# Supplementary material for: New route to amide-functionalized N-donor ligands enables improved selective solvent extraction of trivalent actinides
Source: Royal Society of Chemistry journal article supplement (doi:10.1039/d2cc03876e), 2022-01-01
Supplement: d2cc03876e1.pdf [file d2cc03876e1.pdf]

## ELECTRONIC SUPPLEMENTARY INFORMATION

for the paper entitled

### **New Route to Amide-Functionalized *N*-Donor Ligands Enables Improved Selective Solvent Extraction of Trivalent Actinides**

Rachel Bulmer,<sup>a</sup> Thomas B. Spencer,<sup>a</sup> Andreas Wilden,<sup>b</sup> Giuseppe Modolo,<sup>b</sup> Trong-Hung Vu,<sup>c</sup> Jean-Pierre Simonin<sup>c</sup> and Frank W. Lewis\*<sup>a</sup>

<sup>a</sup> *Department of Applied Sciences, Faculty of Health and Life Sciences, Northumbria University, Newcastle upon Tyne NE1 8ST, UK. E-mail: [frank.lewis@northumbria.ac.uk](mailto:frank.lewis@northumbria.ac.uk)*

<sup>b</sup> *Forschungszentrum Jülich GmbH, Institut für Energie und Klimaforschung - Nukleare Entsorgung und Reaktorsicherheit (IEK-6), 52428 Jülich, Germany. E-mail: [g.modolo@fz-juelich.de](mailto:g.modolo@fz-juelich.de)*

<sup>c</sup> *Laboratoire PHENIX, CNRS, Sorbonne Université (Campus P.M. Curie), 4 Place Jussieu, Case 51, F-75005, Paris, France. E-mail: [jean-pierre.simonin@upmc.fr](mailto:jean-pierre.simonin@upmc.fr)*

| <b>CONTENTS</b>                                         | <b>PAGE</b> |
|---------------------------------------------------------|-------------|
| 1. <b>Experimental Procedures</b>                       | S3          |
| 2. <b>NMR Spectra</b>                                   | S14         |
| 3. <b>Mass Spectra</b>                                  | S33         |
| 4. <b>Solubility Measurements</b>                       | S41         |
| 5. <b>Calculated LogP Values</b>                        | S42         |
| 6. <b>Solvent Extraction Studies</b>                    | S43         |
| 7. <b>NMR Titrations with Metal Salts</b>               | S68         |
| 8. <b>Kinetics and Interfacial Tension Measurements</b> | S91         |
| 9. <b>References</b>                                    | S93         |

# 1: Experimental Procedures

## General Procedures

All solvents and reagents were purchased from Sigma-Aldrich, Acros Organics, Fluorochem or Alfa-Aesar and used without further purification unless otherwise specified. Reactions were monitored by TLC using silica gel with UV<sub>254</sub> fluorescent indicator. Uncorrected melting points were measured in open capillary tubes using an SRS DigiMelt MPA160 instrument with an upper limit of 260 °C. NMR spectra were recorded on a JEOL ECS400FT Delta spectrometer (399.78 MHz for <sup>1</sup>H NMR, 100.53 MHz for <sup>13</sup>C NMR). Chemical shifts are reported in parts per million (ppm) relative to tetramethylsilane as internal standard. Coupling constants (*J*) are measured in hertz. Multiplets are reported as follows: b = broad, s = singlet, d = doublet, dd = double doublet, dt = double triplet, t = triplet, q = quartet, qu = quintet, m = multiplet, app d = apparent doublet, app t = apparent triplet. Low resolution mass spectra were obtained in methanol solutions on a Thermo Finnigan LCQ Advantage MS detector using electrospray ionisation (ESI). High resolution mass spectra were obtained on a Thermo Scientific LTQ Orbitrap XL Mass Spectrometer using electrospray ionization (ESI) at the EPSRC UK National Mass Spectrometry Service (University of Swansea). Column chromatography was conducted using 0.060–0.20 mm silica gel (70–230 mesh), and automated flash column chromatography was performed using a Biotage Isolera One ISO-1SV instrument. Bis-amidrazones **11**<sup>1</sup> and **15**<sup>2</sup> were synthesized following known procedures.

## 1*S*-(+)-Ketopinic acid **6**<sup>3</sup>

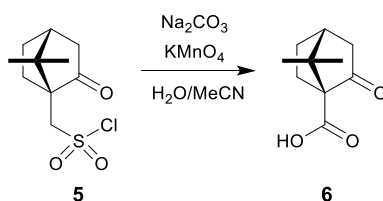

A solution of sodium carbonate (3.804 g, 35.893 mmol, 3 eq) and potassium permanganate (4.159 g, 26.322 mmol, 2.2 eq) in water (45 mL) and acetonitrile (30 mL) was prepared by dissolving both solids in water (45 mL) and then adding acetonitrile (30 mL). To this solution was added a solution of (+)-10-camphorsulfonyl chloride **5** (3.00 g, 11.964 mmol) in acetonitrile (15 mL) dropwise over 5 minutes. The solution was stirred at room temperature for 30 minutes and was then stirred at 70 °C for 3 hours. The solution was allowed to cool to room temperature and separate aqueous solutions of sulfuric acid (2 M, 25 mL) and sodium sulfite

(2 M, 50 mL) were successively added. Further quantities of sulfuric acid were added until the pH was approx. 2–3. The resulting clear colorless solution was extracted with diethyl ether (3 × 50 mL). The combined organic extracts were dried over magnesium sulfate, filtered and evaporated to afford pure 1*S*-(+)-ketopininc acid **6** as a white solid (1.594 g, 73%). <sup>1</sup>H NMR (399.8 MHz, CDCl<sub>3</sub>, Me<sub>4</sub>Si): δ 2.57 (1H, app d, *J* = 18.8 Hz, 3-CH<sub>2</sub><sub>exo</sub>), 2.37–2.43 (1H, m, CH), 2.13 (1H, app s, 4-CH), 2.06–2.10 (1H, m, CH), 2.01 (1H, d, *J* = 18.8 Hz, 3-CH<sub>2</sub><sub>endo</sub>), 1.76–1.82 (1H, m, CH), 1.40–1.46 (1H, m, CH), 1.18 (3H, s, CH<sub>3</sub>), 1.10 (3H, s, CH<sub>3</sub>) ppm.

#### Compound **7**<sup>4</sup>

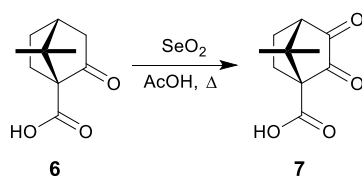

(1*S*)-(+)-Ketopininc acid **6** (4.984 g, 27.351 mmol) was dissolved in acetic acid (50 mL) and SeO<sub>2</sub> (6.68 g, 60.201 mmol, 2.2 eq) was added. The reaction mixture was heated under reflux for 48 hours. The flask was allowed to cool to room temperature and the reaction mixture was filtered through celite and washed with EtOAc (100 mL). The filtrate was evaporated to afford the crude product **7** as a yellow solid. The solid was triturated with chloroform (100 mL) and the insoluble residue was filtered and washed with chloroform (50 mL), and the filtrate was evaporated to afford the product **7** as a yellow solid. The solid was again triturated with chloroform (50 mL) and the insoluble residue was filtered and washed with chloroform (20 mL), and the filtrate was evaporated to afford the pure product **7** as a yellow solid (5.288 g, 98%). <sup>1</sup>H NMR (399.8 MHz, CDCl<sub>3</sub>, Me<sub>4</sub>Si): δ 2.72 (1H, d, *J* = 5.04 Hz, 4-CH), 2.42 (1H, td, *J* = 12.82, 4.58 Hz, CH), 2.28 (1H, tt, *J* = 5.04, 4.58 Hz, CH), 2.03 (1H, tt, *J* = 5.04, 4.58 Hz, CH), 1.71 (1H, ddd, *J* = 5.04, 4.58 Hz, CH), 1.25 (3H, s, CH<sub>3</sub>), 1.25 (3H, s, CH<sub>3</sub>). <sup>13</sup>C NMR (100.5 MHz, CDCl<sub>3</sub>, Me<sub>4</sub>Si): δ 201.0 (C=O), 199.5 (C=O), 172.6 (CO<sub>2</sub>H), 67.3 (quat), 58.0 (4-CH), 44.8 (quat), 26.6 (CH<sub>2</sub>), 22.1 (CH<sub>3</sub>), 21.4 (CH<sub>2</sub>), 18.4 (CH<sub>3</sub>) ppm.

#### Diketones **8–10**: General Procedure

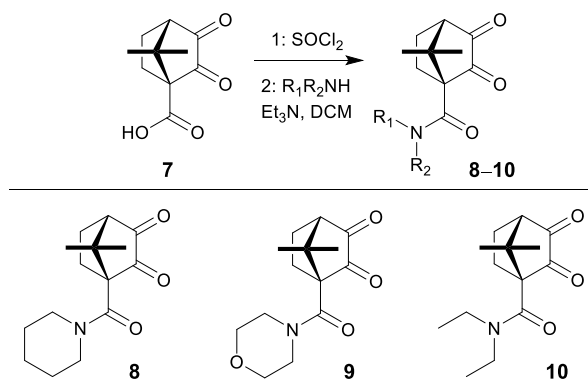

Compound **7** was dissolved in thionyl chloride (10 mL per g of **7**) and the solution was heated under reflux for 2 hours. The excess thionyl chloride was evaporated and the residue was dissolved in DCM (20 mL per g of **7**). The solution was cooled to 0 °C and a solution of the appropriate amine (1.5 eq) and triethylamine (1.6 eq) in DCM (16 mL per g of **7**) was added slowly dropwise. The solution was allowed to warm to room temperature and stirring was continued for 24 hours. Water (100 mL) was added and the phases were mixed and separated. The organic phase was washed with water (100 mL) and aqueous hydrochloric acid solution (0.1 M, 50 mL), and was then dried over magnesium sulfate, filtered and evaporated to afford the pure diketone **8–10** which was used in the next step without further purification.

**Diketone 8:** Obtained from **7** (2.22 g, 11.326 mmol) and piperidine (1.68 mL, 16.989 mmol) as a yellow solid (2.87 g, 96%). Mp 131–133.5 °C (from DCM). Found C, 68.09; H, 8.00; N, 5.27%.  $\text{C}_{15}\text{H}_{21}\text{NO}_3$  requires C, 68.42; H, 8.04; N, 5.32%.  $^1\text{H}$  NMR (399.8 MHz,  $\text{CDCl}_3$ ,  $\text{Me}_4\text{Si}$ ):  $\delta$  3.57–3.37 (4H, m,  $2 \times \text{CH}_2$ ), 2.55 (1H, d,  $J = 5.04$  Hz, 4-CH), 2.46 (1H, ddd,  $J = 4.61, 4.58$  Hz, CH), 2.32–2.13 (2H, m,  $2 \times \text{CH}$ ), 2.05–1.95 (1H, m, CH) 1.76–1.60 (6H, m,  $3 \times \text{CH}_2$ ), 1.34 (3H, s,  $\text{CH}_3$ ), 1.26 (3H, s,  $\text{CH}_3$ ) ppm.  $^{13}\text{C}$  NMR (100.5 MHz,  $\text{CDCl}_3$ ,  $\text{Me}_4\text{Si}$ ):  $\delta$  200.7 (C=O), 198.1 (C=O), 165.0 (CON), 65.9 (quat), 57.8 (4-CH), 45.8 (quat), 27.6 ( $\text{CH}_2$ ), 24.5 ( $\text{CH}_2$ ), 22.4 ( $\text{CH}_3$ ), 19.5 ( $\text{CH}_3$ ) ppm.  $m/z$  (HRMS, ESI) 264.1594 ( $[\text{M} + \text{H}]^+$ );  $\text{C}_{15}\text{H}_{22}\text{NO}_3$  requires 264.1594.

**Diketone 9:** Obtained from **7** (0.56 g, 2.857 mmol) and morpholine (0.37 mL, 4.285 mmol) in 86% yield as a yellow solid. Mp 105–106.5 °C (from DCM). Found C, 62.97; H, 7.24; N, 5.59%.  $\text{C}_{14}\text{H}_{19}\text{NO}_4$  requires C, 63.38; H, 7.22; N, 5.28%.  $^1\text{H}$  NMR (399.8 MHz,  $\text{CDCl}_3$ ,  $\text{Me}_4\text{Si}$ ):  $\delta$  3.81–3.44 (8H, m,  $4 \times \text{CH}_2$ ), 2.59 (1H, d,  $J = 5.04$  Hz, CH), 2.46 (1H, td,  $J = 12.82, 4.58, 4.12$  Hz, CH), 2.30 (1H, tt,  $J = 13.28, 5.04$  Hz, CH), 2.17 (1H, ddd,  $J = 9.16, 4.58, 4.12$  Hz, CH), 1.75 (1H, ddd,  $J = 9.16, 4.58, 4.12$  Hz, CH), 1.37 (3H, s,  $\text{CH}_3$ ), 1.28 (3H, s,  $\text{CH}_3$ )

ppm.  $^{13}\text{C}$  NMR (100.5 MHz,  $\text{CDCl}_3$ ,  $\text{Me}_4\text{Si}$ ):  $\delta$  200.1 (C=O), 198.0 (C=O), 165.3 (CON), 67.0 ( $4 \times \text{CH}_2$ ), 57.7 (CH), 45.8 (quat), 27.3 ( $\text{CH}_2$ ), 22.7 ( $\text{CH}_2$ ), 22.3 ( $\text{CH}_3$ ), 19.3 ( $\text{CH}_3$ ) ppm.  $m/z$  (HRMS, ESI) 266.1389 ( $[\text{M} + \text{H}]^+$ );  $\text{C}_{14}\text{H}_{20}\text{NO}_4$  requires 266.1387.

**Diketone 10:** Obtained from **7** (2.08 g, 10.612 mmol) and diethylamine (1.65 mL, 15.918 mmol, 1.5 eq) as a yellow solid (2.57 g, 96%). Mp 144–145.5 °C (from DCM). Found C, 66.62; H, 8.46; N, 5.62%.  $\text{C}_{14}\text{H}_{21}\text{NO}_3$  requires C, 66.91; H, 8.42; N, 5.57%.  $^1\text{H}$  NMR (399.8 MHz,  $\text{CDCl}_3$ ,  $\text{Me}_4\text{Si}$ ):  $\delta$  3.55 (1H, qu,  $J = 14.65, 7.33, 6.87$  Hz, CH), 3.36 (1H, qu,  $J = 14.65, 7.33, 6.87$  Hz, CH) 3.23 (2H, qu,  $J = 14.20, 7.33, 6.87$  Hz,  $2 \times \text{NCH}$ ), 2.56 (1H, d,  $J = 5.04$  Hz, CH), 2.46 (1H, td,  $J = 13.28, 4.58, 4.12$  Hz, CH), 2.29 (1H, tt,  $J = 13.74, 5.04, 4.58$  Hz, CH), 2.14 (1H, ddd,  $J = 9.16, 4.58$  Hz, CH), 1.74 (1H, ddd,  $J = 5.04, 4.58, 4.12$  Hz, CH), 1.34 (3H, s,  $\text{CH}_3$ ), 1.29 (3H, s,  $\text{CH}_3$ ), 1.18 (6H, sp,  $J = 7.33, 6.87, 6.41$  Hz,  $2 \times \text{CH}_3$ ) ppm.  $^{13}\text{C}$  NMR (100.5 MHz,  $\text{CDCl}_3$ ,  $\text{Me}_4\text{Si}$ ):  $\delta$  200.7 (C=O), 198.2 (C=O), 165.7 (CON), 67.5 (quat), 57.7 (CH), 45.9 (quat), 41.9 ( $\text{CH}_2\text{N}$ ), 40.5 ( $\text{CH}_2\text{N}$ ), 27.8 ( $\text{CH}_2$ ), 22.7 ( $\text{CH}_2$ ), 22.5 ( $\text{CH}_3$ ), 19.2 ( $\text{CH}_3$ ), 14.4 ( $\text{CH}_3$ ), 12.7 ( $\text{CH}_3$ ) ppm.  $m/z$  (HRMS, ESI) 252.1595 ( $[\text{M} + \text{H}]^+$ );  $\text{C}_{14}\text{H}_{22}\text{NO}_3$  requires 252.1594.

### BTPhen Ligands 12–14: General Procedure

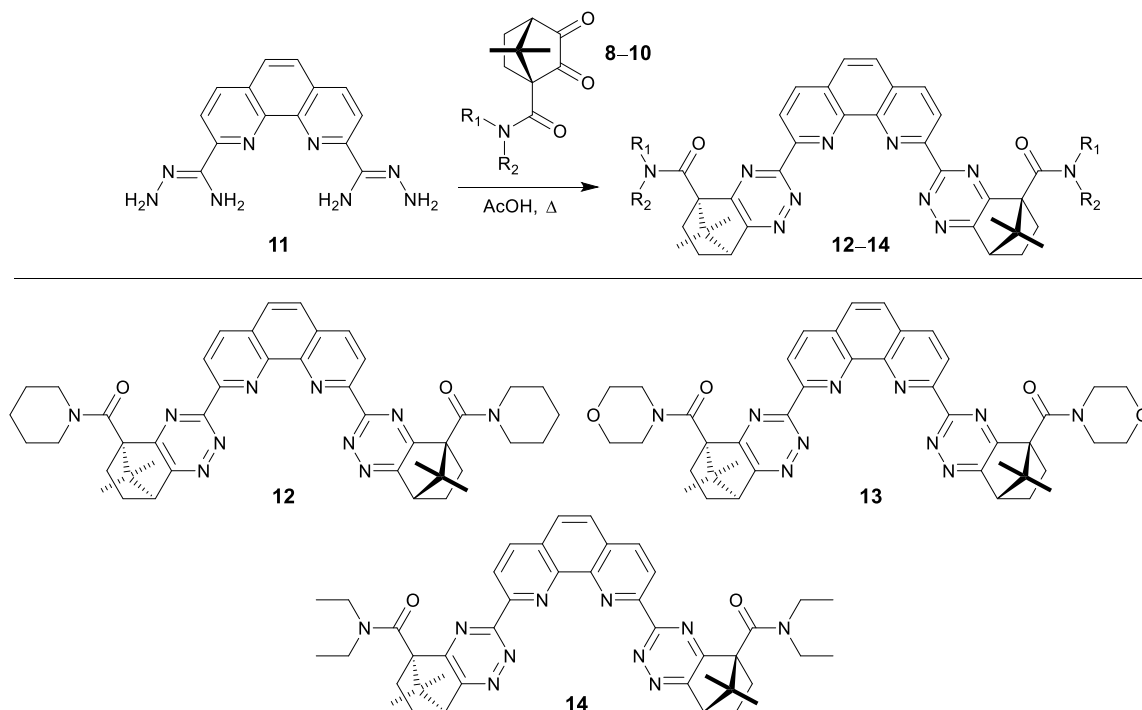

1,10-Phenanthroline-2,9-bis-amidrazones **11** was dissolved in acetic acid (30 mL per g of **11**) and the appropriate diketone **8–10** (2 eq) was added. The solution was heated under reflux for 24 hours. The solution was allowed to cool to room temperature and the solvent was

evaporated. The residue was dissolved in DCM (100 mL per g of **11**) and the solution was washed with saturated aqueous sodium hydrogen carbonate (3 × 100 mL per g of **11**) and water (100 mL per g of **11**), and was then dried over magnesium sulfate, filtered and evaporated to afford the crude BTPhen ligand **12–14** as an orange solid. The crude product was dissolved in DCM (15 mL per g of **11**) and diethyl ether (150 mL per g of **11**) was added. The precipitated solid was filtered and washed with diethyl ether (100 mL per g of **10**), and the filtrate was evaporated to afford the crude BTPhen ligand **12–14**. The crude product was purified by short-path (ca. 20 cm) column chromatography, eluting with MeOH: DCM (1:10 volume ratio + 1% Et<sub>3</sub>N) to afford the pure BTPhen ligand **12–14**.

**BTPhen Ligand 12:** Obtained from 1,10-phenanthroline-2,9-bis-amidrazone **11** (1.604 g, 5.45627 mmol) and diketone **8** (2.87 g, 2 eq) as a yellow solid (1.80 g, 44%). Mp 240.4–241.6 °C (from DCM/diethyl ether). Found C, 70.17; H, 6.51; N, 18.57%. C<sub>44</sub>H<sub>48</sub>N<sub>10</sub>O<sub>2</sub> requires C, 70.56; H, 6.46; N, 18.70%. <sup>1</sup>H NMR (399.8 MHz, CDCl<sub>3</sub>, Me<sub>4</sub>Si): δ 8.68 (2H, d, *J* = 8.24 Hz, 2 × ArCH), 8.48 (2H, d, *J* = 8.70 Hz, 2 × ArCH), 7.97 (2H, s, 2 × ArCH), 3.88–3.55 (8H, m, 4 × CH<sub>2</sub>), 3.24 (2H, d, *J* = 4.12 Hz, 2 × CH), 2.72 (2H, td, *J* = 4.12, 3.66 Hz, 2 × CH<sub>exo</sub>), 2.53–2.46 (2H, m, 2 × CH<sub>exo</sub>), 1.95 (2H, ddd, *J* = 4.12, 3.66 Hz, 2 × CH<sub>endo</sub>), 1.67 (12H, br s, 6 × CH<sub>2</sub>), 1.57–1.50 (2H, m, 2 × CH<sub>endo</sub>), 1.43 (6H, s, 2 × CH<sub>3</sub>), 0.99 (6H, s, 2 × CH<sub>3</sub>) ppm. <sup>13</sup>C NMR (100.5 MHz, CDCl<sub>3</sub>, Me<sub>4</sub>Si): δ 166.9 (2 × CON), 166.2 (2 × quat), 164.9 (2 × quat), 162.1 (2 × quat), 154.1 (2 × quat), 146.7 (2 × quat), 137.0 (2 × ArCH), 129.4 (2 × quat), 127.5 (2 × ArCH), 123.3 (2 × ArCH), 62.7 (2 × quat), 60.1 (2 × quat), 51.5 (2 × CH), 29.3 (2 × CH<sub>2</sub>), 27.2 (2 × CH<sub>2</sub>), 26.0 (2 × CH<sub>2</sub>), 24.5 (2 × CH<sub>2</sub>), 24.4 (2 × CH<sub>2</sub>), 21.7 (2 × CH<sub>3</sub>), 20.7 (2 × CH<sub>3</sub>) ppm. *m/z* (HRMS, ESI) 749.4028 ([M + H]<sup>+</sup>); C<sub>44</sub>H<sub>49</sub>N<sub>10</sub>O<sub>2</sub> requires 749.4034.

**BTPhen Ligand 13:** Obtained from 1,10-phenanthroline-2,9-bis-amidrazone **11** (0.0843 g, 0.2867 mmol) and diketone **9** (0.16 g, 0.6037 mmol) as a yellow solid (0.188 g, 86%). Mp 255–255.6 °C (from DCM/diethyl ether). Found C, 66.81; H, 6.02; N, 18.38%. C<sub>42</sub>H<sub>44</sub>N<sub>10</sub>O<sub>4</sub> requires C, 67.00; H, 5.89; N, 18.60%. <sup>1</sup>H NMR (399.8 MHz, CDCl<sub>3</sub>, Me<sub>4</sub>Si): δ 8.56 (2H, d, *J* = 8.24 Hz, 2 × ArCH), 8.50 (2H, d, *J* = 8.24 Hz, 2 × ArCH), 7.98 (2H, s, 2 × ArCH), 4.1–3.4 (16H, m, 4 × CH<sub>2</sub>O and 4 × CH<sub>2</sub>N), 3.29 (2H, d, *J* = 4.12 Hz, 2 × CH), 2.70 (2H, td, *J* = 4.12, 3.66 Hz, 2 × CH), 2.53–2.46 (2H, m, 2 × CH), 2.05–1.94 (2H, m, 2 × CH), 1.59–1.50 (2H, m, 2 × CH), 1.43 (6H, s, 2 × CH<sub>3</sub>), 1.03 (6H, s, 2 × CH<sub>3</sub>) ppm. <sup>13</sup>C NMR (100.5 MHz, CDCl<sub>3</sub>, Me<sub>4</sub>Si): δ 166.8 (2 × CON), 166.7 (2 × quat), 164.9 (2 × quat), 161.9 (2 × quat), 153.8 (2 × quat), 146.4

(2 × quat), 137.4 (2 × ArCH), 129.6 (2 × quat), 127.6 (2 × ArCH), 123.1 (2 × ArCH), 67.2 (8 × CH<sub>2</sub>), 62.4 (2 × quat), 60.2 (2 × quat), 51.4 (2 × CH), 28.9 (2 × CH<sub>2</sub>), 24.3 (2 × CH<sub>2</sub>), 21.6 (2 × CH<sub>3</sub>), 20.5 (2 × CH<sub>3</sub>) ppm. *m/z* (HRMS, ESI) 753.3614 ([M + H]<sup>+</sup>); C<sub>42</sub>H<sub>45</sub>N<sub>10</sub>O<sub>4</sub> requires 753.3620.

**BTPhen Ligand 14:** Obtained from 1,10-phenanthroline-2,9-bis-amidrazone **11** (1.505 g, 5.11952 mmol) and diketone **10** (2.57 g, 2 eq) as a yellow solid (1.96 g, 53%). Mp 195.2–195.8 °C (from DCM/diethyl ether). Found C, 69.32; H, 6.85; N, 19.21%. C<sub>42</sub>H<sub>48</sub>N<sub>10</sub>O<sub>2</sub> requires C, 69.59; H, 6.67; N, 19.32%. <sup>1</sup>H NMR (399.8 MHz, CDCl<sub>3</sub>, Me<sub>4</sub>Si): δ 8.69 (2H, d, *J* = 8.70 Hz, 2 × ArCH), 8.46 (2H, d, *J* = 8.70 Hz, 2 × ArCH), 7.95 (2H, s, 2 × ArCH), 3.98–3.92 (2H, m, CH<sub>2</sub>N), 3.76–3.70 (2H, m, CH<sub>2</sub>N), 3.66–3.61 (2H, m, CH<sub>2</sub>N), 3.48–3.43 (2H, m, CH<sub>2</sub>N), 3.24 (2H, d, *J* = 4.12 Hz, 2 × CH), 2.70 (2H, ddd, *J* = 9.16, 8.70, 3.66 Hz, 2 × CH), 2.53–2.45 (2H, m, 2 × CH), 1.95–1.88 (2H, m, 2 × CH), 1.56 (2H, ddd, *J* = 9.16, 8.70, 3.66 Hz, 2 × CH), 1.42 (6H, s, 2 × CH<sub>3</sub>), 1.30 (6H, t, *J* = 7.33 Hz, 2 × CH<sub>3</sub>CH<sub>2</sub>N), 1.25 (6H, t, *J* = 7.33 Hz, 2 × CH<sub>3</sub>CH<sub>2</sub>N), 1.01 (6H, s, 2 × CH<sub>3</sub>) ppm. <sup>13</sup>C NMR (100.5 MHz, CDCl<sub>3</sub>, Me<sub>4</sub>Si): δ 167.0 (2 × CON), 165.3 (4 × quat), 161.3 (2 × quat), 153.5 (2 × quat), 146.5 (2 × quat), 137.3 (2 × ArCH), 129.7 (2 × quat), 127.6 (2 × ArCH), 122.9 (2 × ArCH), 62.7 (2 × quat), 60.3 (2 × quat), 51.4 (2 × CH), 43.0 (2 × CH<sub>2</sub>), 40.9 (2 × CH<sub>2</sub>), 29.3 (2 × CH<sub>2</sub>), 24.3 (2 × CH<sub>2</sub>), 21.8 (2 × CH<sub>3</sub>), 20.3 (2 × CH<sub>3</sub>), 15.3 (2 × CH<sub>3</sub>), 13.1 (2 × CH<sub>3</sub>) ppm. *m/z* (HRMS, ESI) 725.4028 ([M + H]<sup>+</sup>); C<sub>42</sub>H<sub>49</sub>N<sub>10</sub>O<sub>2</sub> requires 725.4034.

### CA-BTBP 17 and CA-BTPhen 18: General Procedure

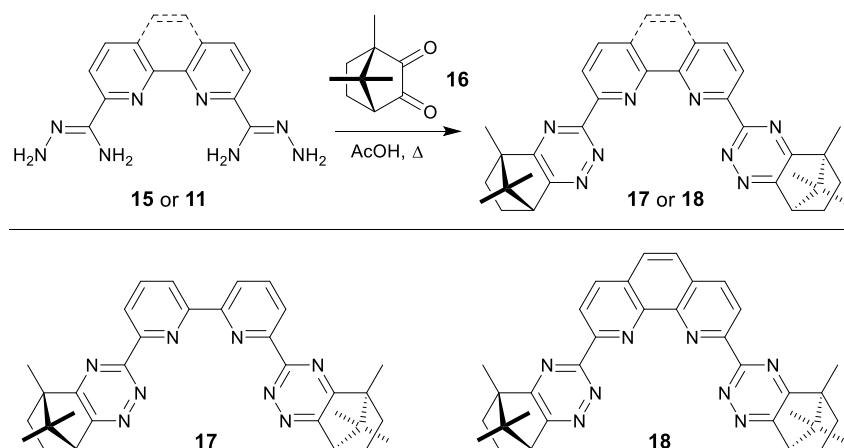

The appropriate bis-amidrazone **15** or **11** was dissolved in acetic acid (60 mL per g of **15** or **11**) and (1S)-(+)-camphorquinone **16** (2.1 eq) was added. The solution was heated under reflux for 24 hours. The solution was allowed to cool to room temperature and the solvent was



evaporated. The residue was dissolved in DCM (100 mL per g of **15** or **11**) and the solution was washed with saturated aqueous sodium hydrogen carbonate ( $3 \times 100$  mL per g of **15** or **11**) and water (100 mL per g of **15** or **11**), and was then dried over magnesium sulfate, filtered and evaporated to afford the crude ligand **17** or **18** as an orange solid. The crude solid was triturated with diethyl ether (100 mL per g of **15** or **11**) and the insoluble solid was filtered and washed with diethyl ether (250 mL per g of **15** or **11**) and hexane (10 mL per g of **15** or **11**) to afford the pure ligand **17** or **18**.

**CA-BTBP 17:** Obtained from 2,2'-bipyridine-6,6'-bis-amidrazone **15** (0.2037 g, 0.7544 mmol) and (1S)-(+)-camphorquinone **16** (0.263 g, 2.1 eq) as a yellow solid (0.203 g, 53%). Mp 176.3–178.0 °C (from diethyl ether). Found C, 72.15; H, 6.43; N, 20.89%.  $C_{32}H_{34}N_8$  requires C, 72.43; H, 6.46; N, 21.12%.  $^1H$  NMR (399.8 MHz,  $CDCl_3$ ,  $Me_4Si$ ):  $\delta$  8.93 (2H, d,  $J = 7.79$  Hz,  $2 \times ArCH$ ), 8.60 (2H, d,  $J = 7.79$  Hz,  $2 \times ArCH$ ), 8.08 (2H, t,  $J = 7.79$  Hz,  $2 \times ArCH$ ), 3.32 (2H, d,  $J = 4.12$  Hz,  $2 \times CH$ ), 2.39–2.32 (2H, m,  $2 \times CH_{exo}$ ), 2.14–2.08 (2H, m,  $2 \times CH_{exo}$ ), 1.52–1.41 (4H, m,  $4 \times CH_{endo}$ ), 1.49 (6H, s,  $2 \times CH_3$ ), 1.15 (6H, s,  $2 \times CH_3$ ), 0.69 (6H, s,  $2 \times CH_3$ ) ppm.  $^{13}C$  NMR (100.5 MHz,  $CDCl_3$ ,  $Me_4Si$ ):  $\delta$  171.1 ( $2 \times$  quat), 165.3 ( $2 \times$  quat), 161.7 ( $2 \times$  quat), 156.1 ( $2 \times$  quat), 153.0 ( $2 \times$  quat), 138.0 ( $2 \times ArCH$ ), 124.3 ( $2 \times ArCH$ ), 123.1 ( $2 \times ArCH$ ), 55.6 ( $2 \times$  quat), 54.5 ( $2 \times$  quat), 51.2 ( $2 \times CH$ ), 31.1 ( $2 \times CH_2$ ), 24.3 ( $2 \times CH_2$ ), 20.2 ( $2 \times CH_3$ ), 18.4 ( $2 \times CH_3$ ), 9.3 ( $2 \times CH_3$ ) ppm.  $m/z$  (HRMS, ESI) 531.2972 ( $[M + H]^+$ );  $C_{32}H_{35}N_8$  requires 531.2979.

**CA-BTPhen 18:**<sup>5</sup> Obtained from 1,10-phenanthroline-2,9-bis-amidrazone **11** (0.63 g, 2.142857 mmol) and (1S)-(+)-camphorquinone **16** (0.747 g, 2.1 eq) as a yellow solid (0.76 g, 64%).  $^1H$  NMR (399.8 MHz,  $CDCl_3$ ,  $Me_4Si$ ):  $\delta$  8.87 (2H, d,  $J = 8.24$  Hz,  $2 \times ArCH$ ), 8.45 (2H, d,  $J = 8.24$  Hz,  $2 \times ArCH$ ), 7.94 (2H, s,  $2 \times ArCH$ ), 3.31 (2H, d,  $J = 4.12$  Hz,  $2 \times CH$ ), 2.12 (2H, m,  $2 \times CH_{exo}$ ), 2.12 (2H, td,  $J = 9.62, 3.66$  Hz,  $2 \times CH_{exo}$ ), 1.60 (6H, s,  $2 \times CH_3$ ), 1.54 (2H, m,  $2 \times CH_{endo}$ ), 1.45 (2H, m,  $2 \times CH_{endo}$ ), 1.15 (6H, s,  $2 \times CH_3$ ), 0.70 (6H, s,  $2 \times CH_3$ ) ppm.  $^{13}C$  NMR (100.5 MHz,  $CDCl_3$ ,  $Me_4Si$ ):  $\delta$  171.4 ( $2 \times$  quat), 165.5 ( $2 \times$  quat), 161.8 ( $2 \times$  quat), 153.7 ( $2 \times$  quat), 146.2 ( $2 \times$  quat), 137.3 ( $2 \times ArCH$ ), 129.7 ( $2 \times$  quat), 127.6 ( $2 \times ArCH$ ), 123.3 ( $2 \times ArCH$ ), 55.6 ( $2 \times$  quat), 54.7 ( $2 \times$  quat), 51.2 ( $2 \times CH$ ), 31.1 ( $2 \times CH_2$ ), 24.3 ( $2 \times CH_2$ ), 20.3 ( $2 \times CH_3$ ), 18.4 ( $2 \times CH_3$ ), 9.6 ( $2 \times CH_3$ ) ppm.  $m/z$  (HRMS, ESI) 555.2971 ( $[M + H]^+$ );  $C_{34}H_{35}N_8$  requires 555.2979.

### Solubility Measurements

A small sample of each ligand **12–14**, **17** or **18** was accurately weighed in a sample tube to 4 decimal places by subtracting the mass of the sample tube from the mass of the sample tube + ligand. A few drops of 1-octanol were added and the sample was sonicated. This procedure was continued until complete dissolution of the ligand. At this point the mass of the sample tube was again taken to determine the mass of 1-octanol added, which was then converted to volume. The solubility was expressed as mol/L by calculating the mass (g) of each ligand dissolved in 1 L of 1-octanol and dividing by the molecular weight of each ligand. The sample was then left overnight to ensure the ligand remained in solution and did not crystallize.

### Solvent Extraction Measurements

Aqueous solutions representing the composition of a typical DIAMEX feed solution were prepared for the solvent extraction experiments. The DIAMEX feed solution is obtained when spent nuclear fuel solutions have been processed through the PUREX and DIAMEX processes, and is then processed further in the SANEX process,<sup>6</sup> in which the trivalent minor actinides Am(III) and Cm(III) are separated from the trivalent lanthanides. The DIAMEX feed solution does not contain U or Pu as these have already been removed in the preceding PUREX and DIAMEX processes. The aqueous solutions were prepared by spiking nitric acid solutions (0.01–3 M) containing  $1 \times 10^{-5}$  M of each lanthanide (except Pm) and Y with stock solutions of <sup>241</sup>Am, <sup>152</sup>Eu and <sup>244</sup>Cm tracers (10  $\mu$ L) in nitric acid. All the lanthanides were included even though the heavy lanthanides (Tb–Lu) are not fission products. We have chosen to include data for all the lanthanides as data on the extraction of all lanthanides by *N*-donor ligands could be relevant in other fields besides the field of nuclear reprocessing (eg: the field of lanthanide separation and purification). Ultrapure water (18.2 M $\Omega$ cm) was used for all dilutions. The radiotracers <sup>241</sup>Am, <sup>244</sup>Cm and <sup>152</sup>Eu were supplied by Isotopendienst M. Blaseg GmbH, Waldburg (Germany), Oak Ridge National Laboratory, Oak Ridge (USA), and Eckert & Ziegler Nuclitec GmbH, Braunschweig (Germany), respectively. Solutions of the ligands **12–14**, **17** and **18** (0.01 M) were prepared by dissolving **12–14**, **17** or **18** in 1-octanol. 1-octanol was chosen as the diluent to minimize precipitate formation previously found with ligand **4** when using other diluents, and to allow direct comparison with previous results for ligands **1–3**. Each organic phase (500  $\mu$ L) was shaken separately with each of the aqueous phases (500  $\mu$ L) for one hour at 22 °C using a thermostatted aluminum block installed on an IKA Vibrax Orbital Shaker Model VXR (2,200 rpm). The contact time of one hour was sufficient to attain

the distribution equilibrium. After phase separation by centrifugation, 200  $\mu\text{L}$  aliquots of each phase were withdrawn for radio analysis. Activity measurements of the  $\gamma$ -ray emitters  $^{241}\text{Am}$  and  $^{152}\text{Eu}$  were performed with a HPGe  $\gamma$ -ray spectrometer, EG & G Ortec, Munich (Germany). The  $\gamma$ -lines at 59.5 keV, and 121.8 keV were examined for  $^{241}\text{Am}$ , and  $^{152}\text{Eu}$ , respectively. The nuclides  $^{241}\text{Am}$  and  $^{244}\text{Cm}$  were measured by means of alpha spectrometry with an Alpha Spectrometer Octète™ PC obtained from EG & G Ortec, Munich (Germany). Stable elements were determined by ICP-MS on a NexION 2000 obtained from Perkin Elmer Sciex, Rodgau-Jügesheim (Germany). The concentration of inactive elements in organic phases was measured via ICP-MS using Triton-X 100 as surfactant. The distribution ratio  $D$  was calculated as the ratio between the radioactivity/concentration in the organic and the aqueous phase. The separation factor  $SF$  is calculated as the ratio between the distribution ratios of the corresponding metals. Distribution ratios between 0.01 and 100 exhibit a maximum error of  $\pm 5\%$ . The error may be up to  $\pm 20\%$  for smaller and larger values.

### **NMR Titrations**

Stock solutions (0.01 M) of each of the ligands **12**, **14** and **18**, and of the metal nitrate salts  $\text{La}(\text{NO}_3)_3 \cdot 6\text{H}_2\text{O}$ ,  $\text{Lu}(\text{NO}_3)_3 \cdot \text{H}_2\text{O}$  and  $\text{Y}(\text{NO}_3)_3 \cdot 6\text{H}_2\text{O}$  (Aldrich) were prepared in  $\text{CD}_3\text{CN}$  (Fluorochem). A 0.5 mL aliquot of the appropriate ligand solution was placed in an NMR tube and the  $^1\text{H}$  NMR spectrum was recorded at 399.8 MHz on a JEOL ECS400FT Delta spectrometer. The appropriate lanthanide salt solution was added to the NMR tube in 50  $\mu\text{L}$  aliquots (ie: 0.1 equivalents each time) using a calibrated Gilson 100  $\mu\text{L}$  micropipette. The tube was inverted several times to ensure full mixing and the  $^1\text{H}$  NMR spectrum was recorded after each successive addition until the resonances of the free ligand had completely disappeared and/or until no further spectral changes were observed. Homogeneous solutions were obtained after each addition. The relative ratios of the different species present were calculated from the relative integrals of a suitable one-proton resonance of the ligand **12**, **14** or **18**. These values were normalized such that, for a given one-proton resonance, the total integration for all species present equalled unity. The species distributions at different metal:ligand ratios were calculated from these normalized relative ratios.

### **Kinetics and Interfacial Tension Measurements**

The extraction kinetics of Am(III) and Eu(III) by BTPhen **12** in 1-octanol were studied using the rotating membrane cell (RMC) technique (Figure 1). The cell consists of a thin membrane that is glued on the base of a cylinder made of perspex. Membranes purchased from Millipore™

were used. Two types of Millipore membranes were used depending on the type of solution impregnating the membrane: a hydrophilic Omnipore JHWP (PTFE) membrane (thickness: 58  $\mu\text{m}$ , porosity 0.8, tortuosity 2.51) for the 3M  $\text{HNO}_3$  aqueous solution; a hydrophobic HVHP membrane (thickness: 102  $\mu\text{m}$ , porosity 0.75, tortuosity 1.94) for the organic BTPPhen **12** solution in 1-octanol.

The thickness of the membrane is in the range 50-120  $\mu\text{m}$  and its diameter is ca. 8 mm. Depending on its type, it is impregnated with the aqueous or the organic phase. This phase, denoted by A, is spiked with the radioactive tracer to be extracted. The cell is mounted on a rotating-electrode spindle that can be rotated at a definite speed. Initially, it is set into rotation at 600 rpm and it is immersed into the outer phase B.

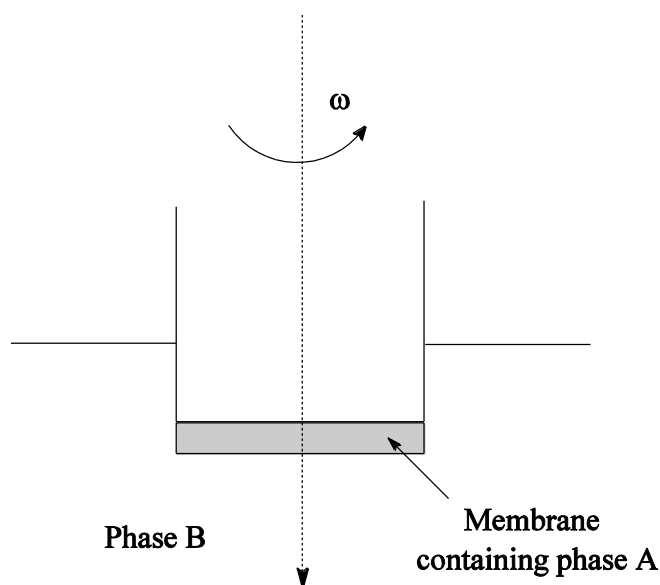

**Figure 1.** Sketch of the rotating membrane cell (RMC) technique.

In phase A, transport in the pores of the membrane is purely diffusive and is governed by Fick's law. In phase B, rotating-disc hydrodynamics is promoted, which leads to a convective transport process which can be described following the theory of Levich.<sup>7</sup> The contributions of the transport processes in phases A and B can be assessed by measuring independently the diffusion coefficients of solute in the two phases. These quantities were determined using the closed capillary technique.<sup>8</sup> Formally, the contributions from the diffusive transport processes can be subtracted from the overall process, so yielding the contribution from interfacial transfer alone.  $^{152}\text{Eu(III)}$  was purchased from LEA-CERCA (France). Two types of hydrophilic membranes were purchased from Millipore™: Durapore HVLP membranes (thickness  $\approx$  120  $\mu\text{m}$ , measured porosity  $\approx$  71.0 %) and Omnipore JHWP membranes (thickness  $\approx$  50  $\mu\text{m}$ , measured porosity  $\approx$  80.5 %). Both types have a pore size of ca. 0.45  $\mu\text{m}$ . For reasons of

compatibility, the Durapore membrane was used with 1-octanol as the organic solvent. These membranes were glued on the plastic cylinder with polyvinyl chloride (PVC) and with a polyimide resin, respectively. It was verified that these compounds did not penetrate significantly into the membranes by measuring their free volume after gluing the membrane. The polyimide was Pyre-M.L.<sup>®</sup> RC-5019 (purchased from Aldrich, CAS no. 25038-81-7). An extraction experiment is conducted as follows. First, the membrane is impregnated with the radiolabelled phase A. In the case that A is an aqueous phase, a small drop of pure organic solvent is rapidly placed on top of the membrane in order to prevent evaporation of the aqueous phase. Then the cell is turned over, it is set into rotation at a known speed and, at  $t = 0$ , it is immersed into phase B. It is removed after a certain lapse of time and a sample of phase B is taken. The activity of this sample is counted in a radioactivity counter together with the activity of the cell bearing the membrane. The amount of extracted solute is deduced from these two results. In most cases, the kinetic experiments were carried out with radiolabelled organic phase placed in the membrane. This stripping configuration is much less extractant consuming than in the case of extraction because the free volume of the membrane is of the order of one thousand times smaller than that of the outer solution. Some experiments in the reverse configuration (by placing the radiolabeled aqueous phase in the membrane) were carried out to check that the same results for the rate constants were obtained.

Interfacial tensions were measured using a K10 Krüss tensiometer and a platinum ring. The measurement was based on the du Noüy ring method in which the ring is detached from the interface at which it is placed initially. The interfacial tension is deduced from the maximum value of the force exerted to detach the ring. The measurements were made for solutions of BTPhen ligand **12** in 1-octanol as the organic phase and for 1 M nitric acid as the aqueous phase. The phases were pre-equilibrated by contacting them for one day. The absence of surface activity is shown by a flat profile in the plot of the interfacial tension as a function of the extractant concentration. On the contrary, the interfacial tension decreases when the extractant is surface active.

## 2: NMR Spectra

### (+)-Ketopinic acid 6

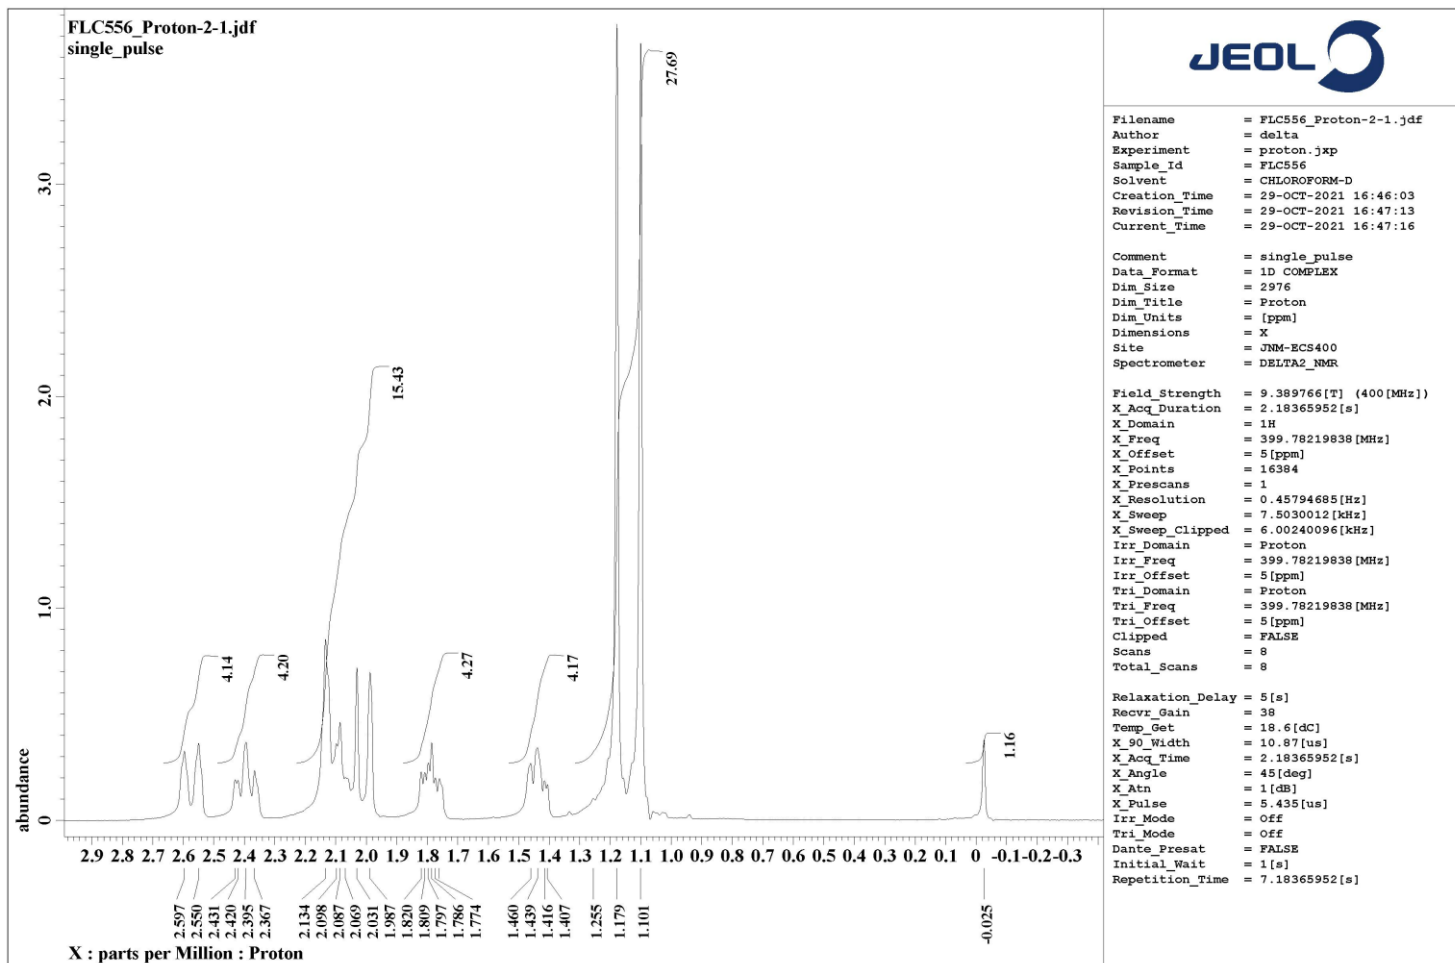

# Compound 7

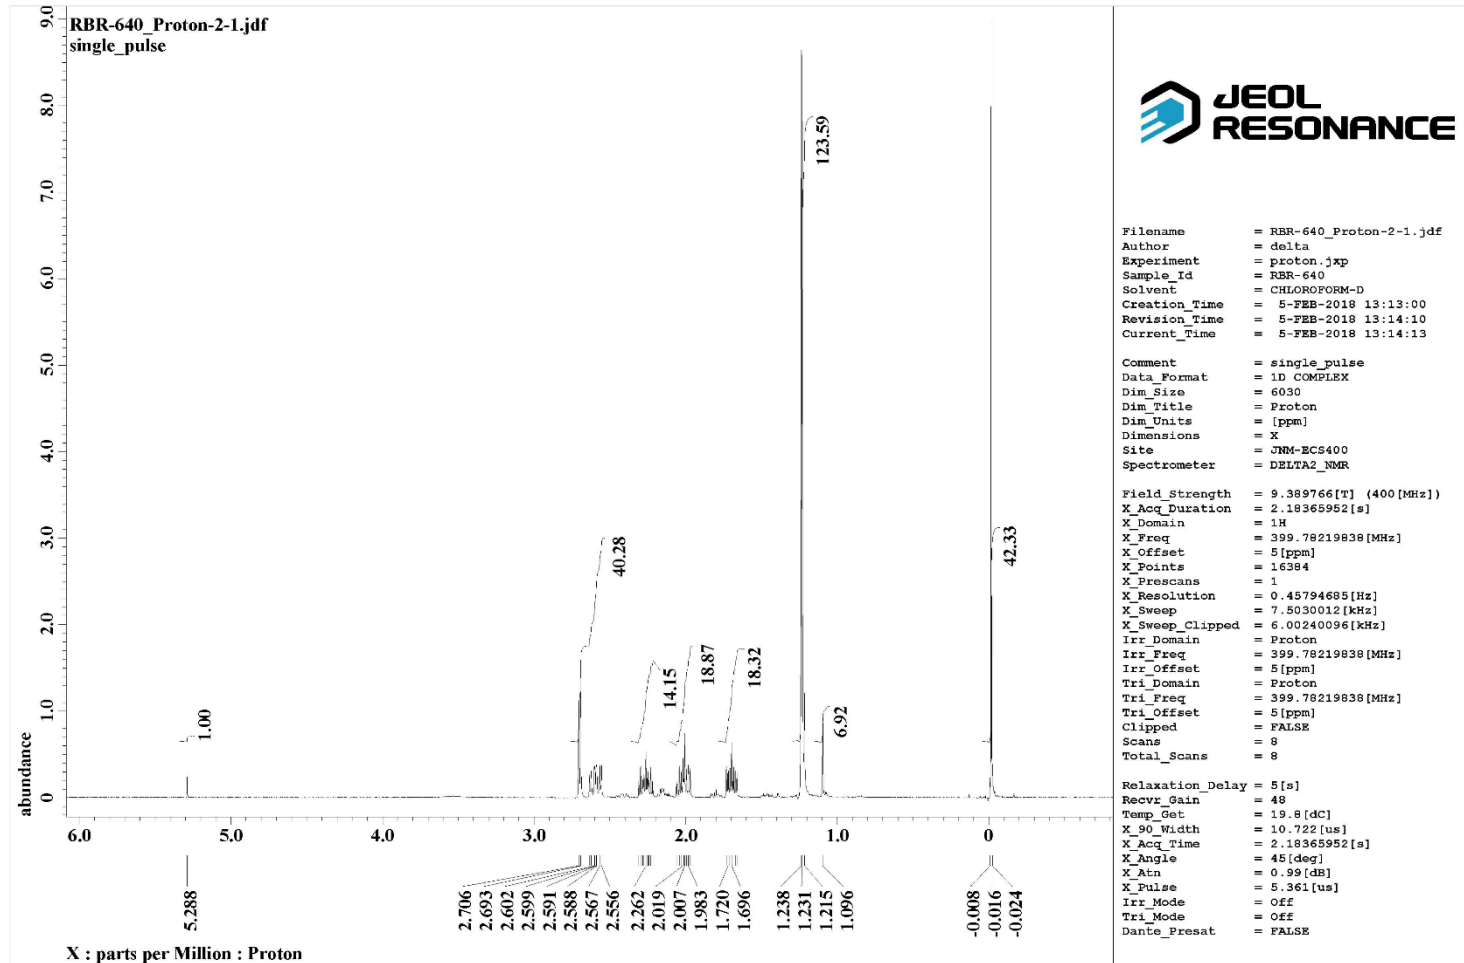

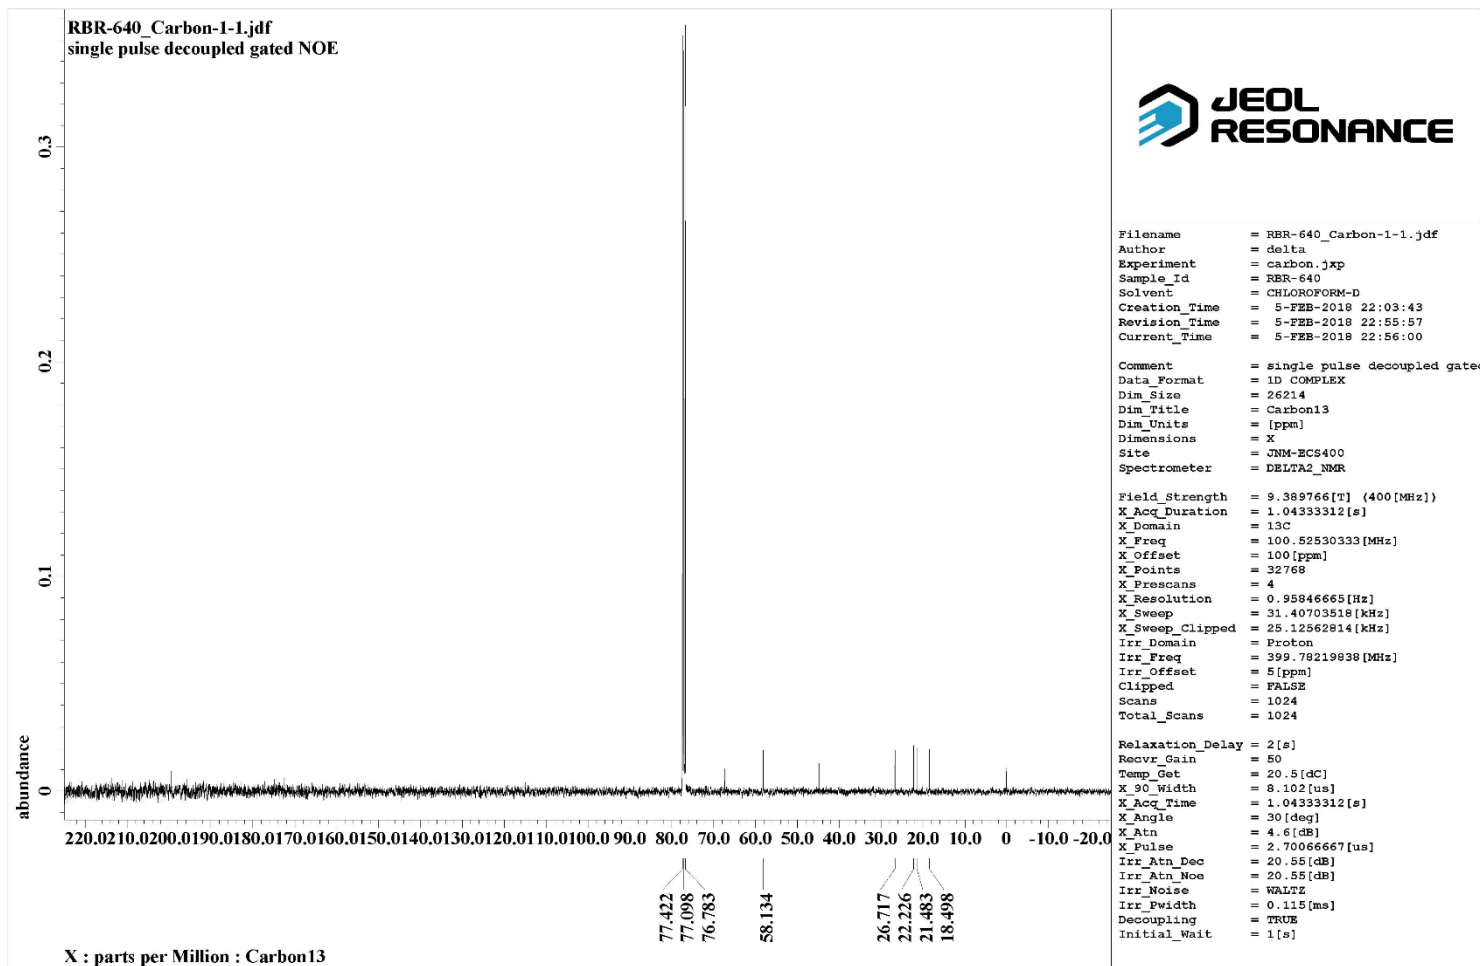



# Compound 8

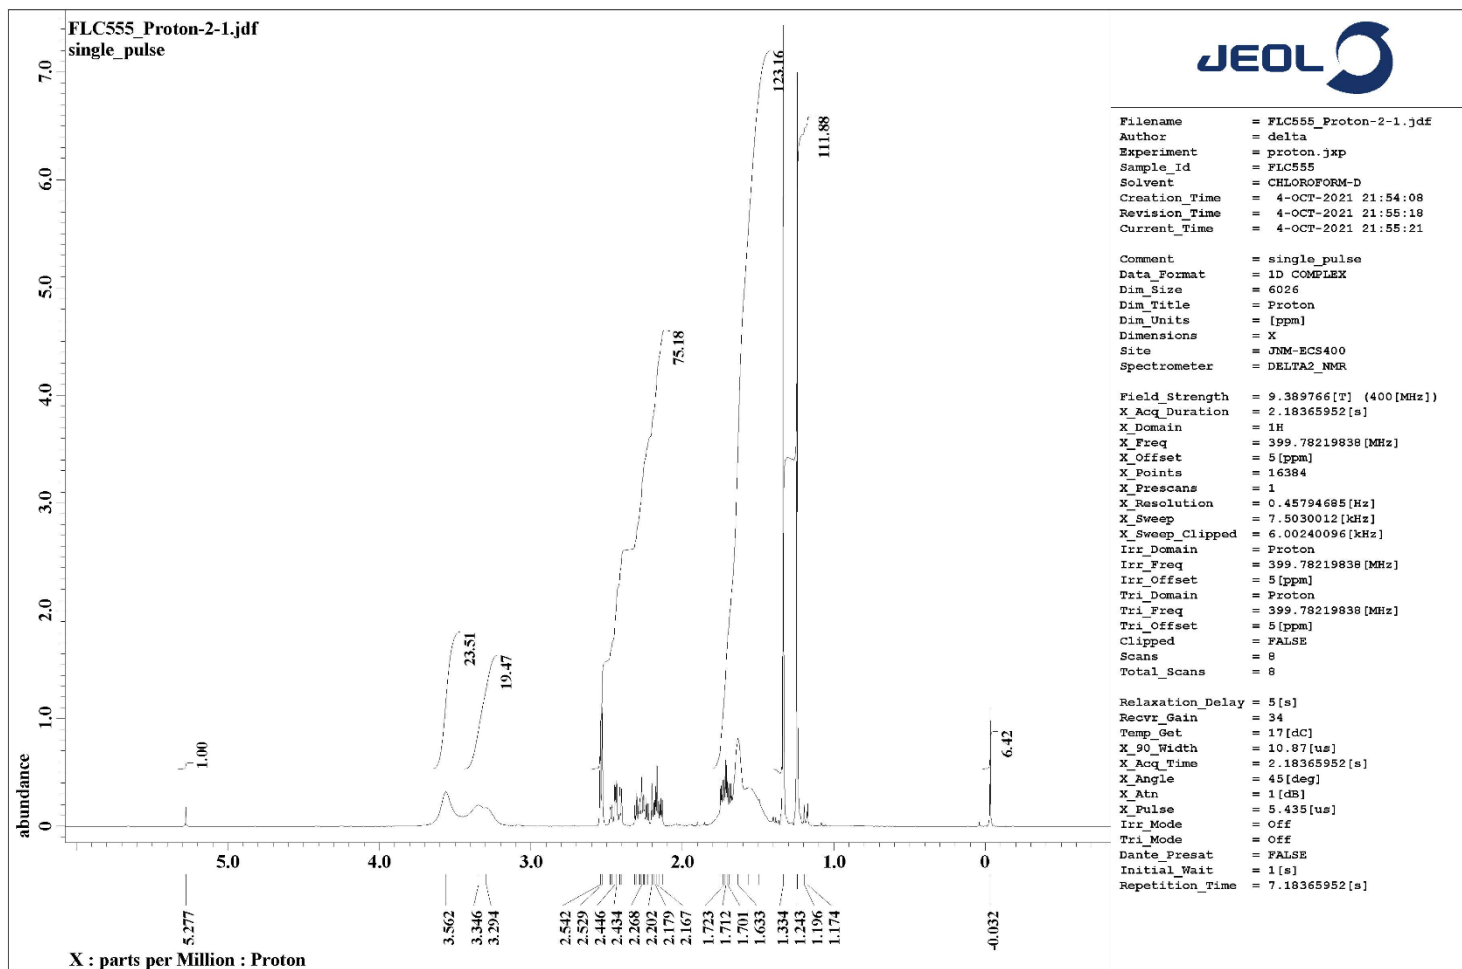

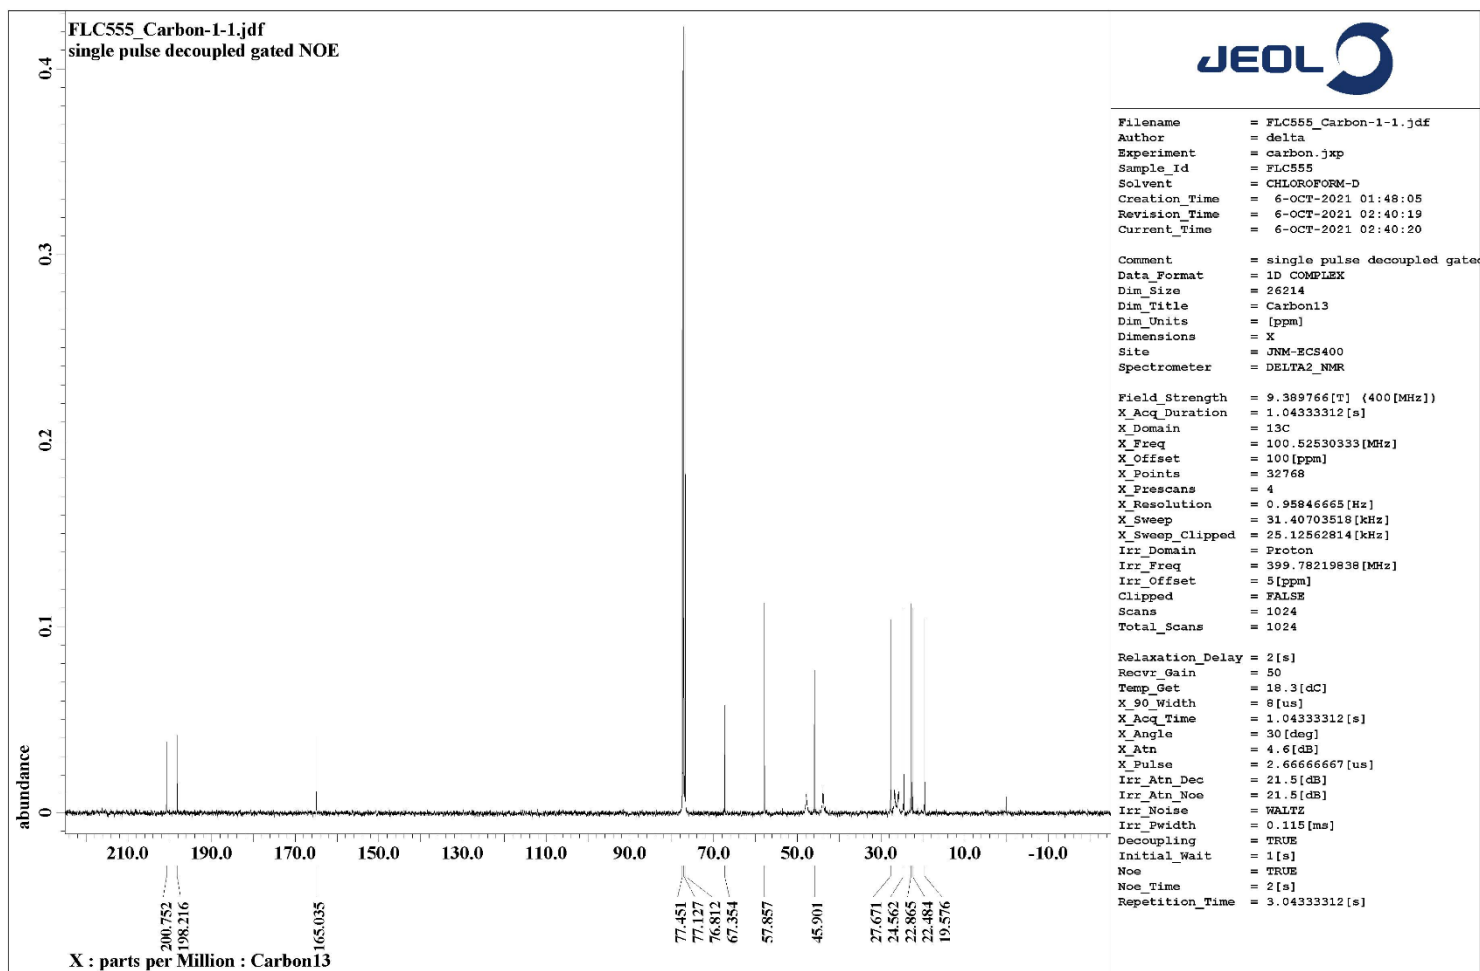

# Compound 9

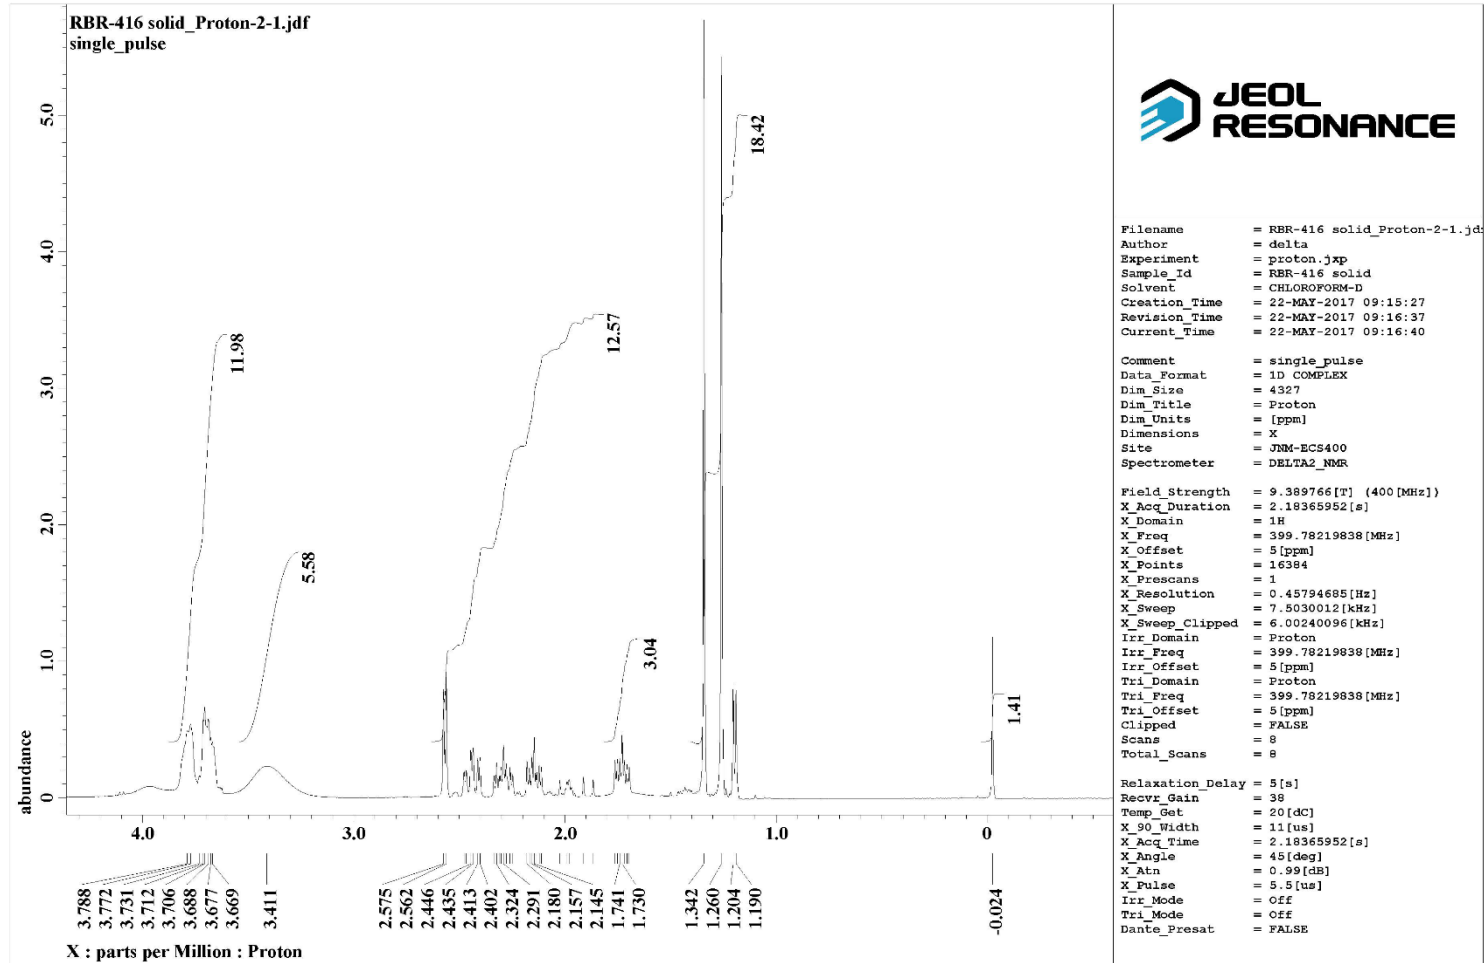

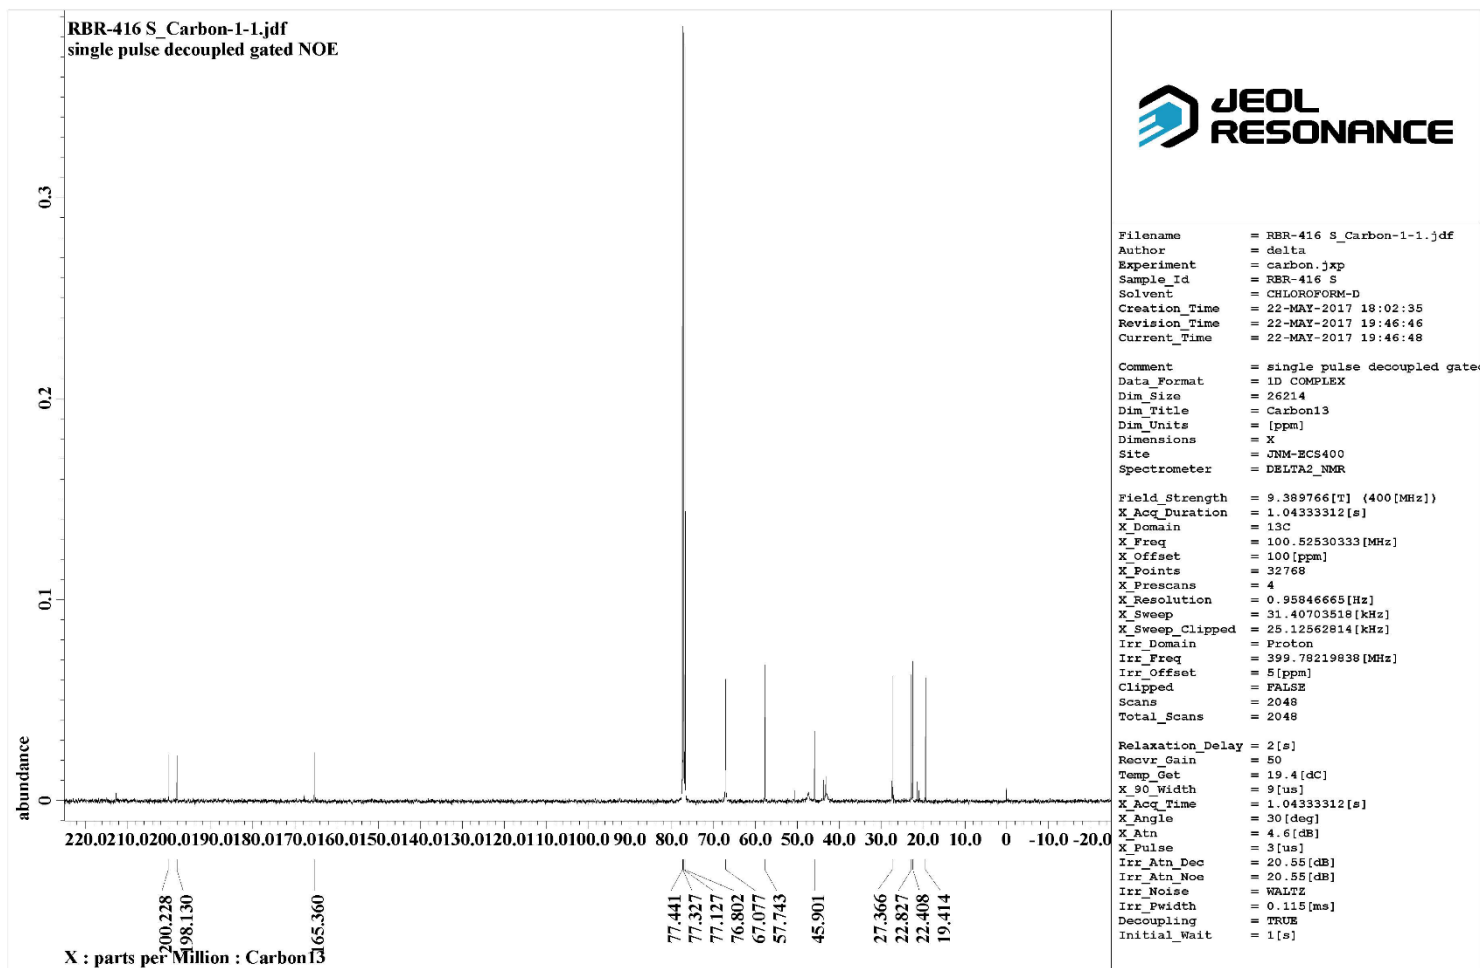

# Compound 10

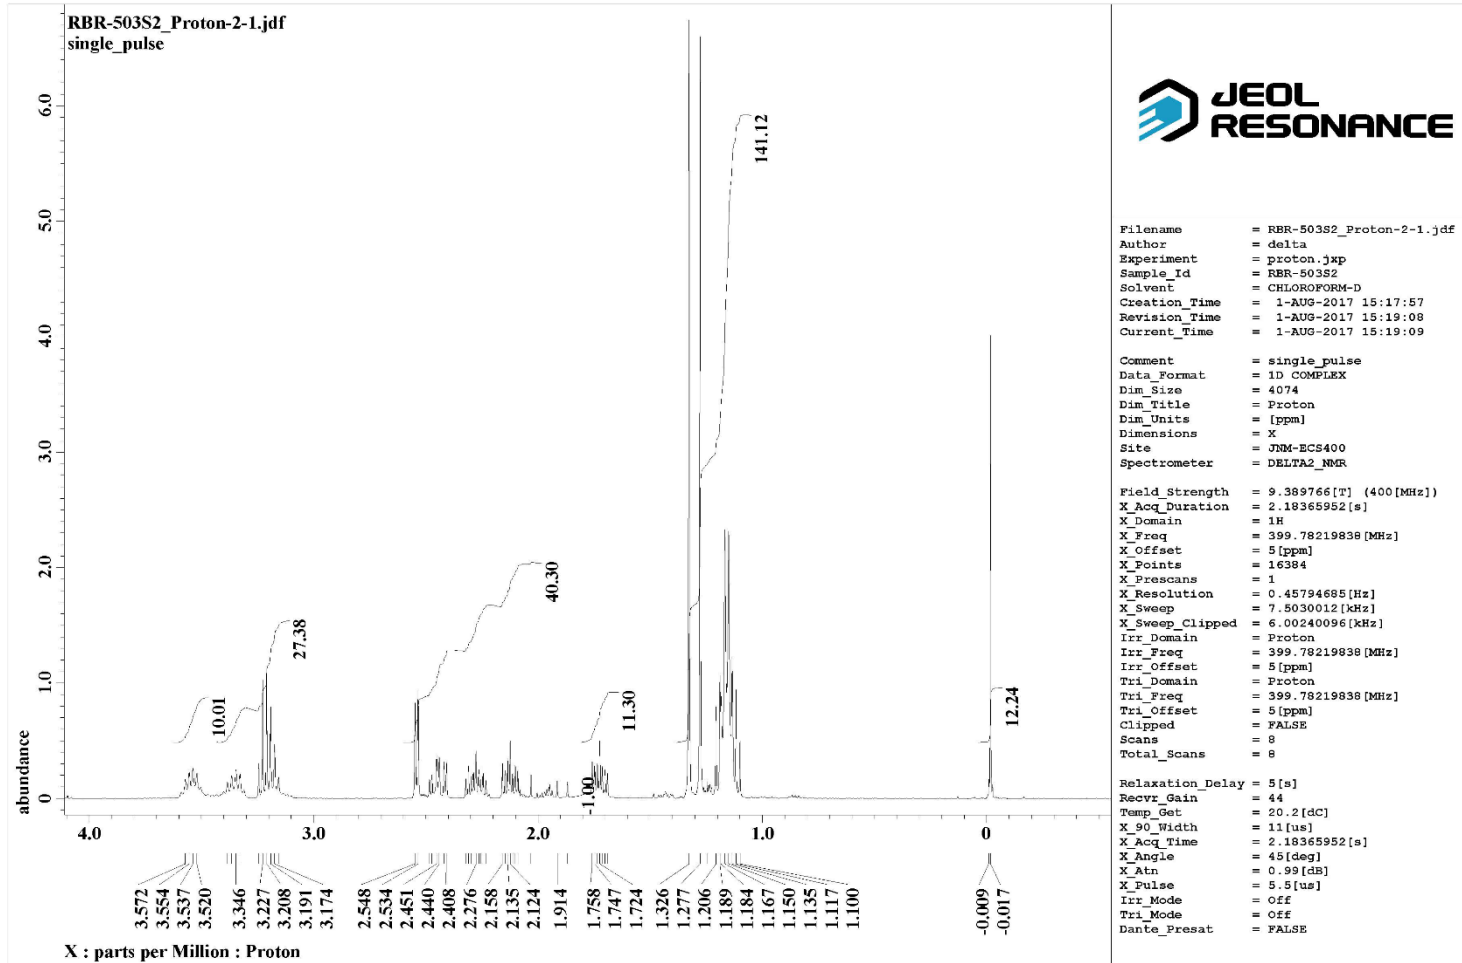

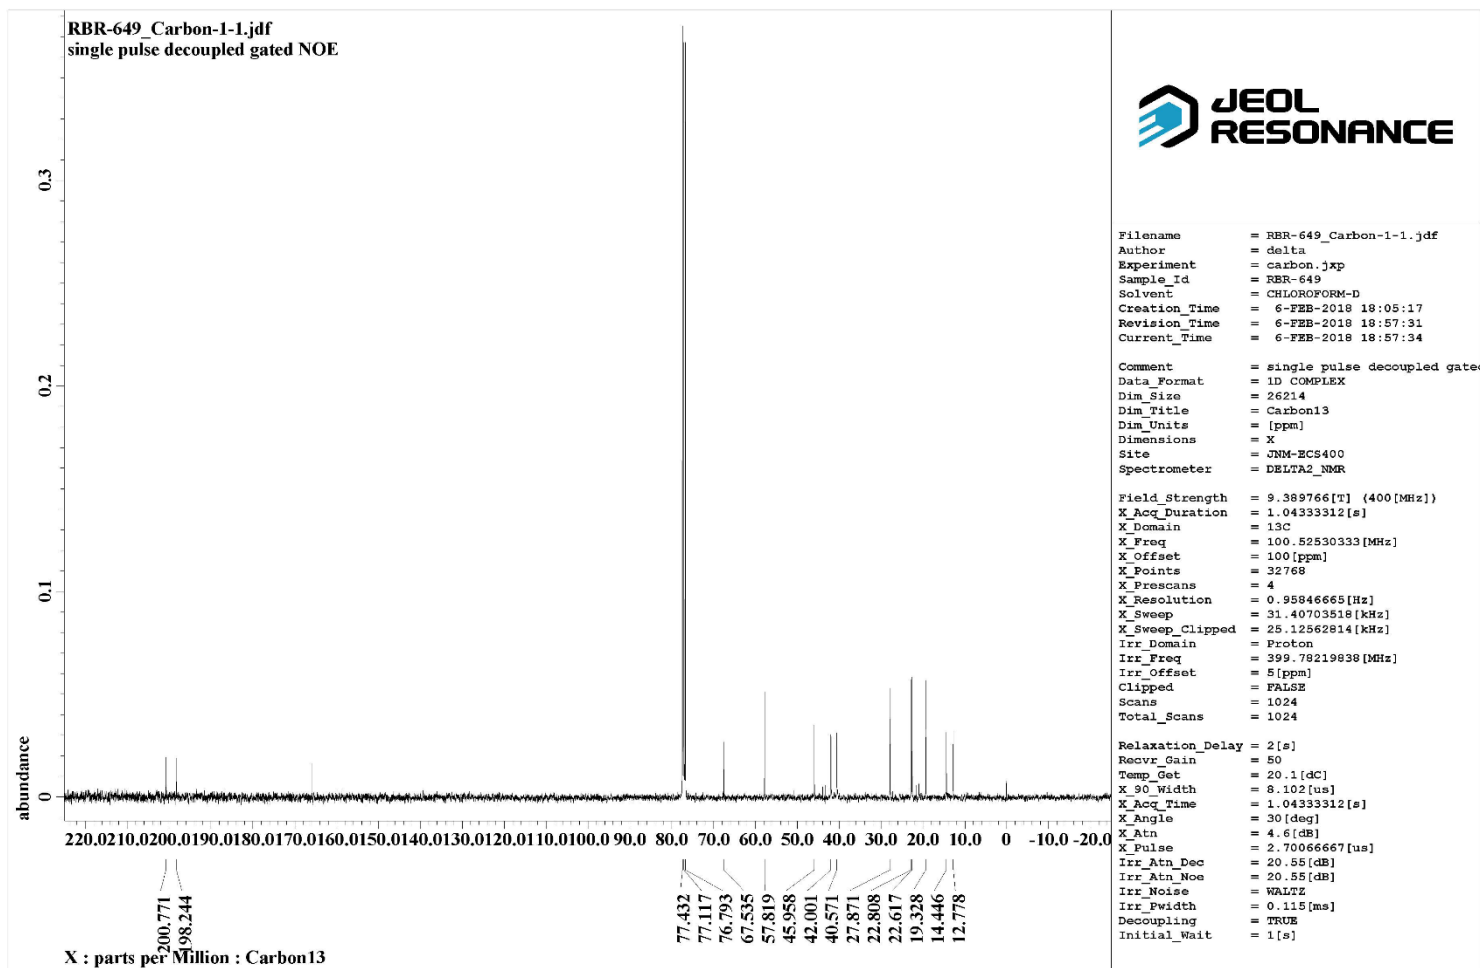

BTPPhen ligand 12

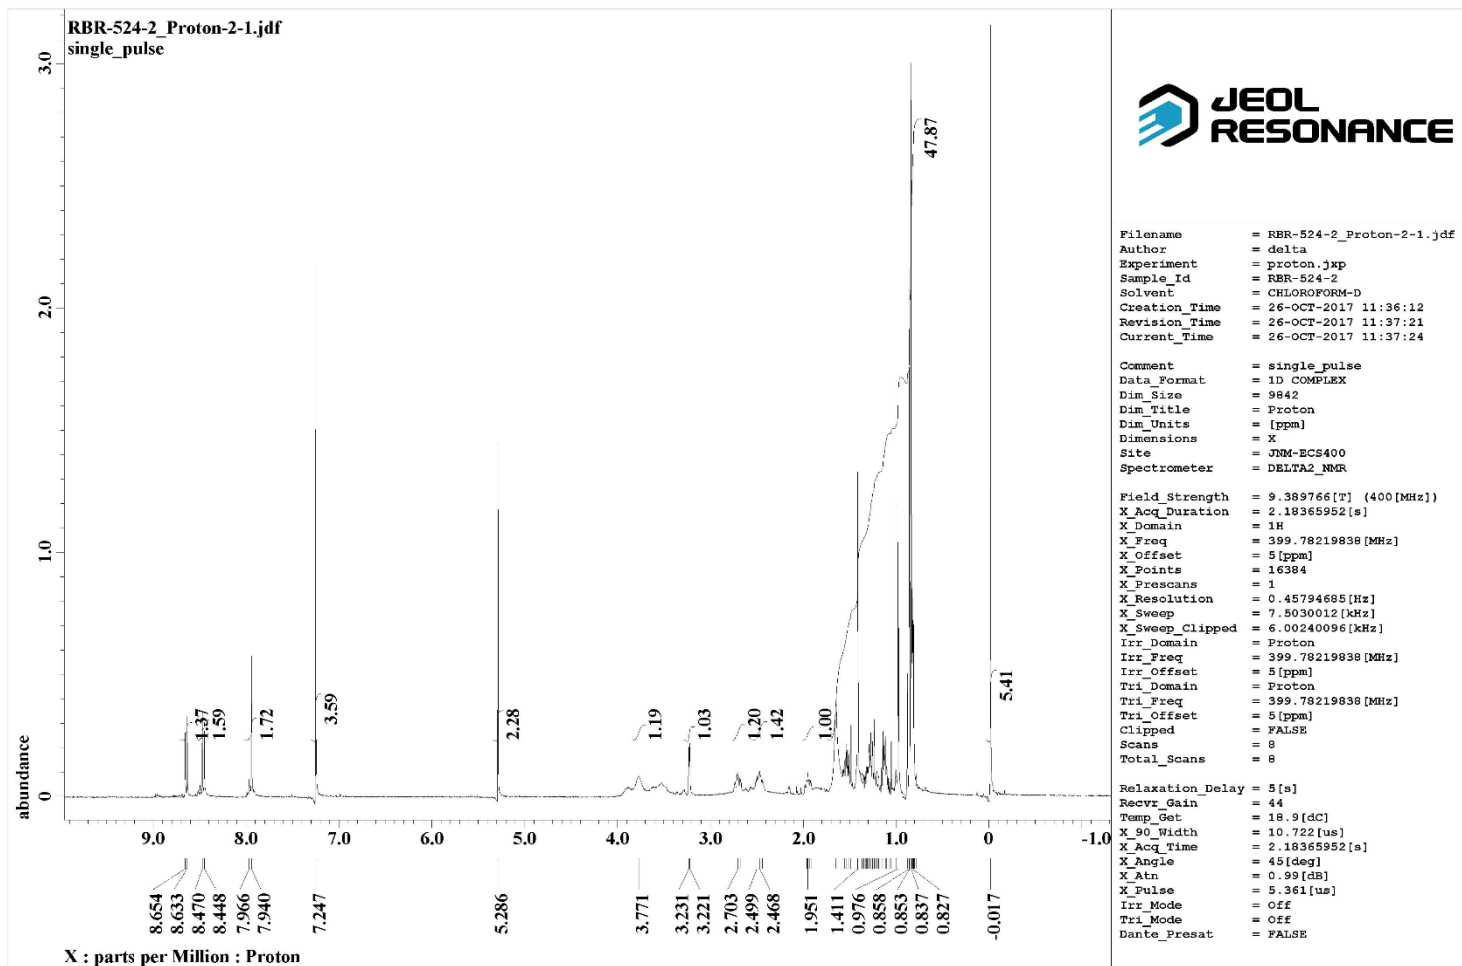

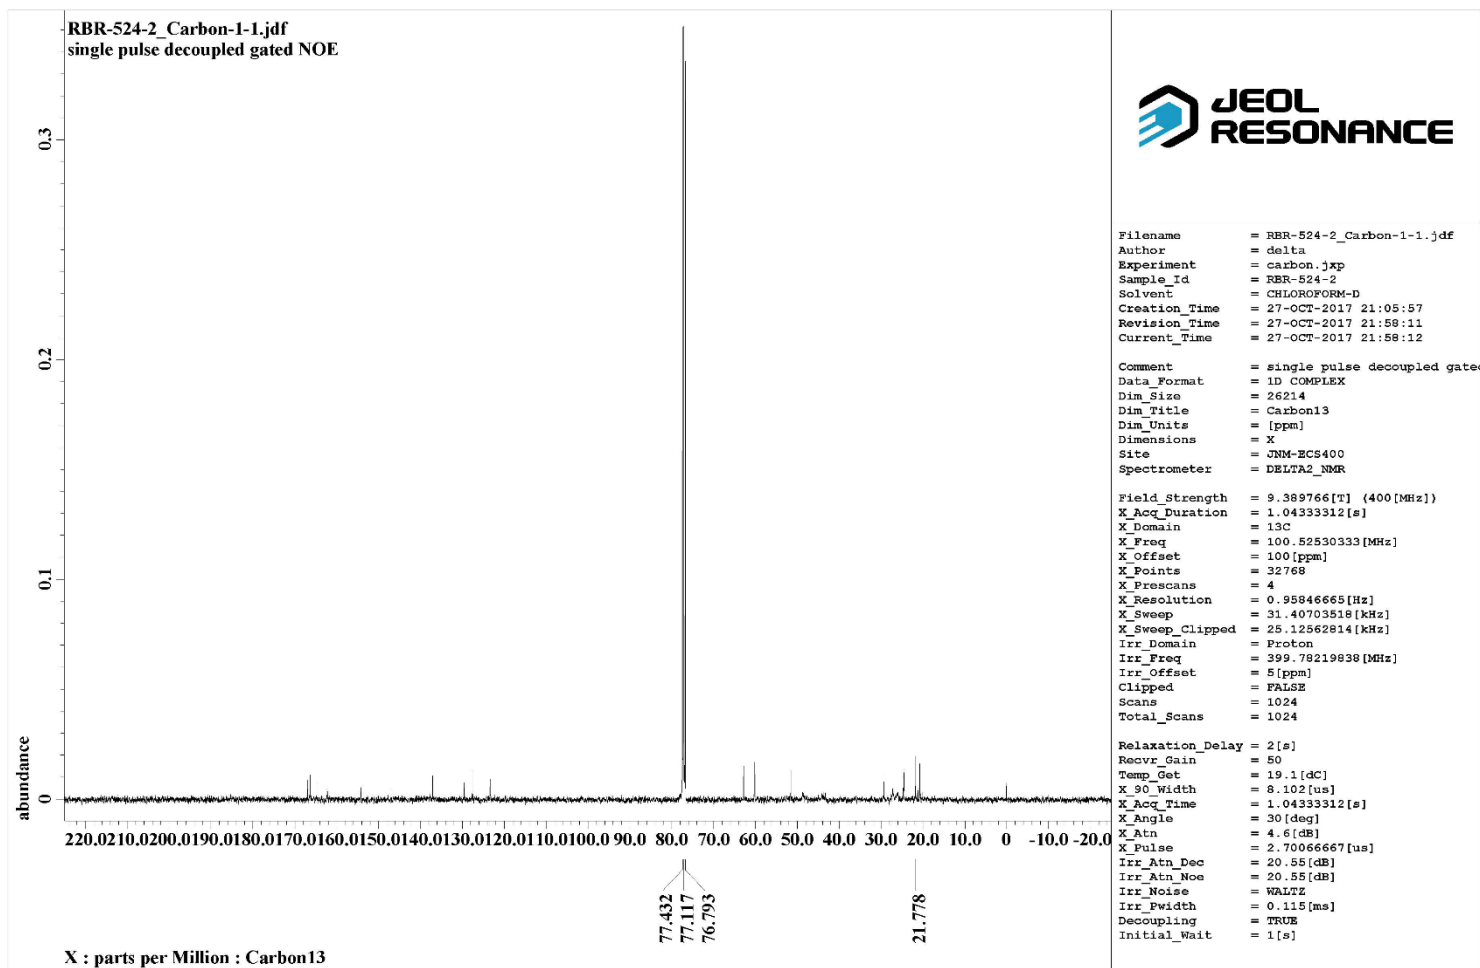



# BTPPhen ligand 13

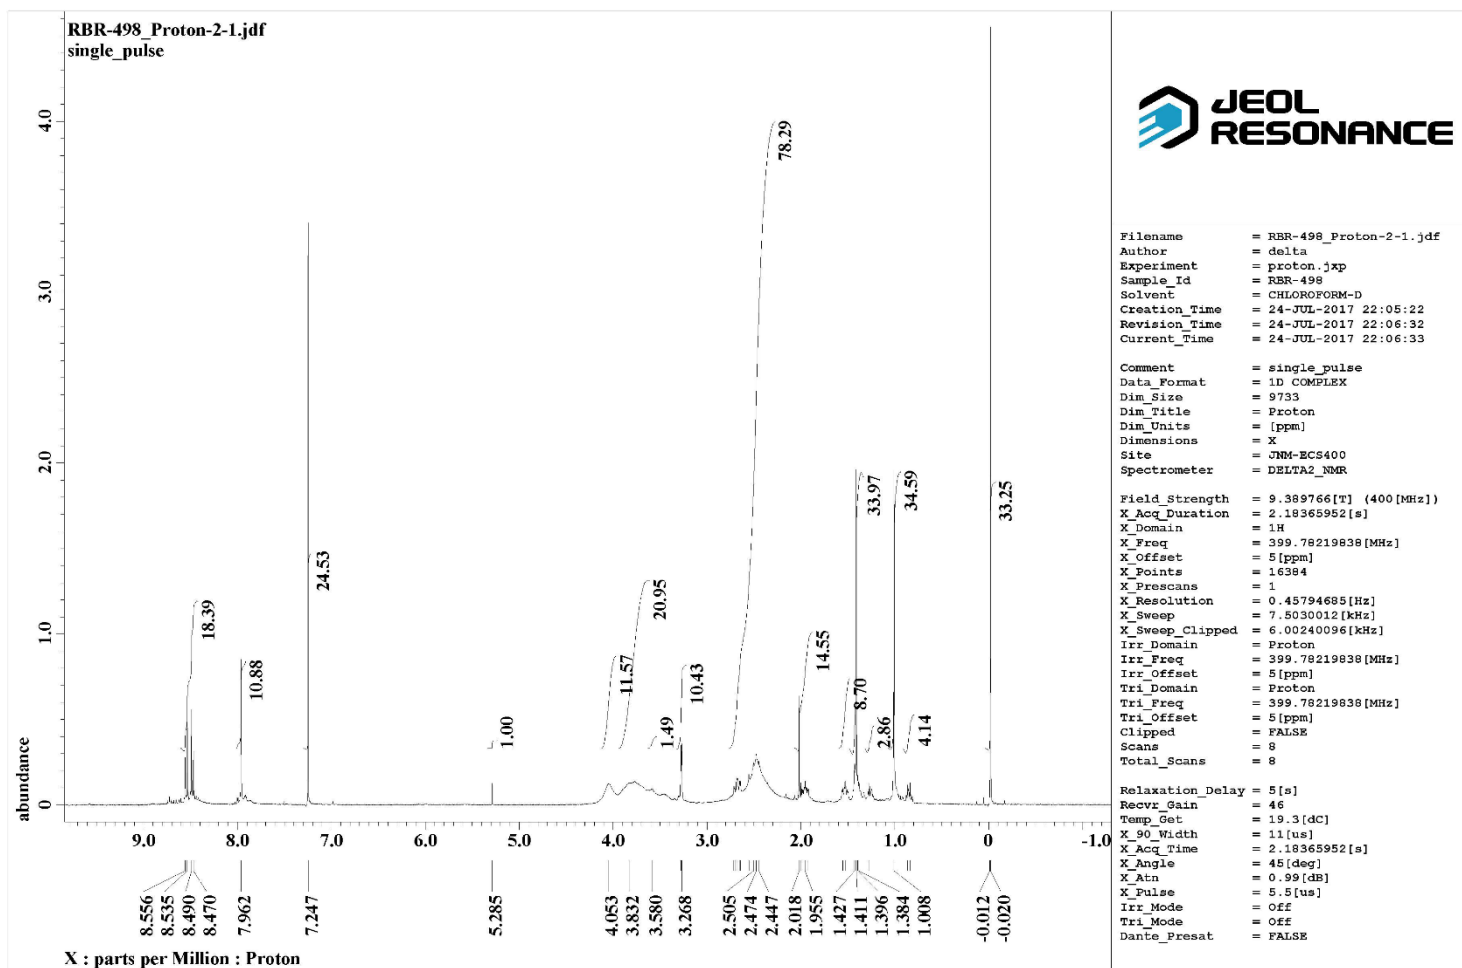

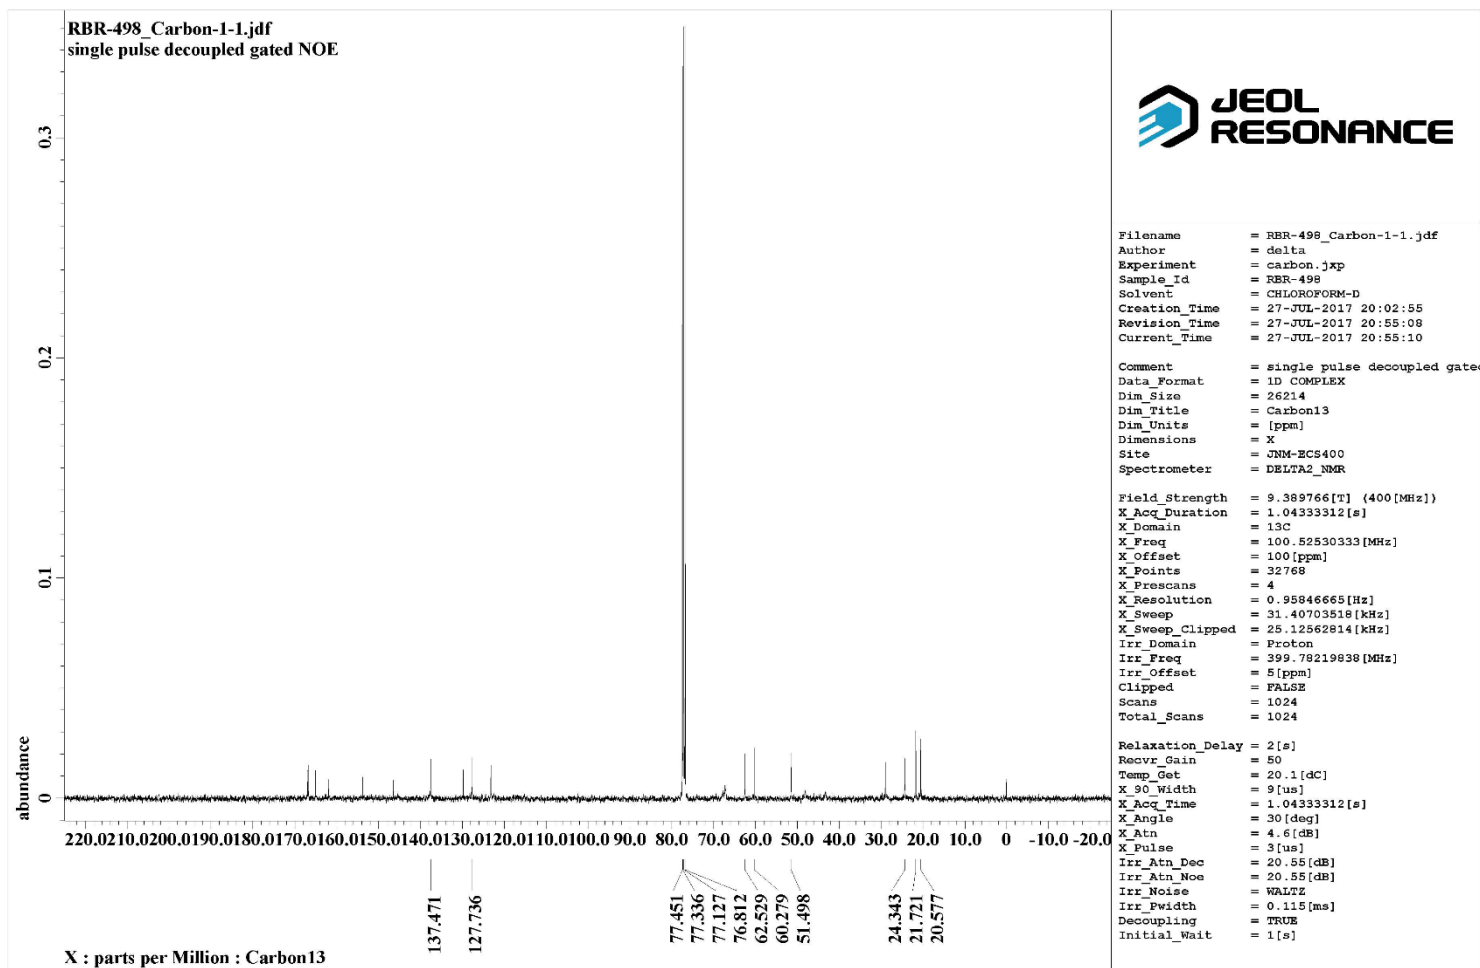

# BTPPhen ligand 14

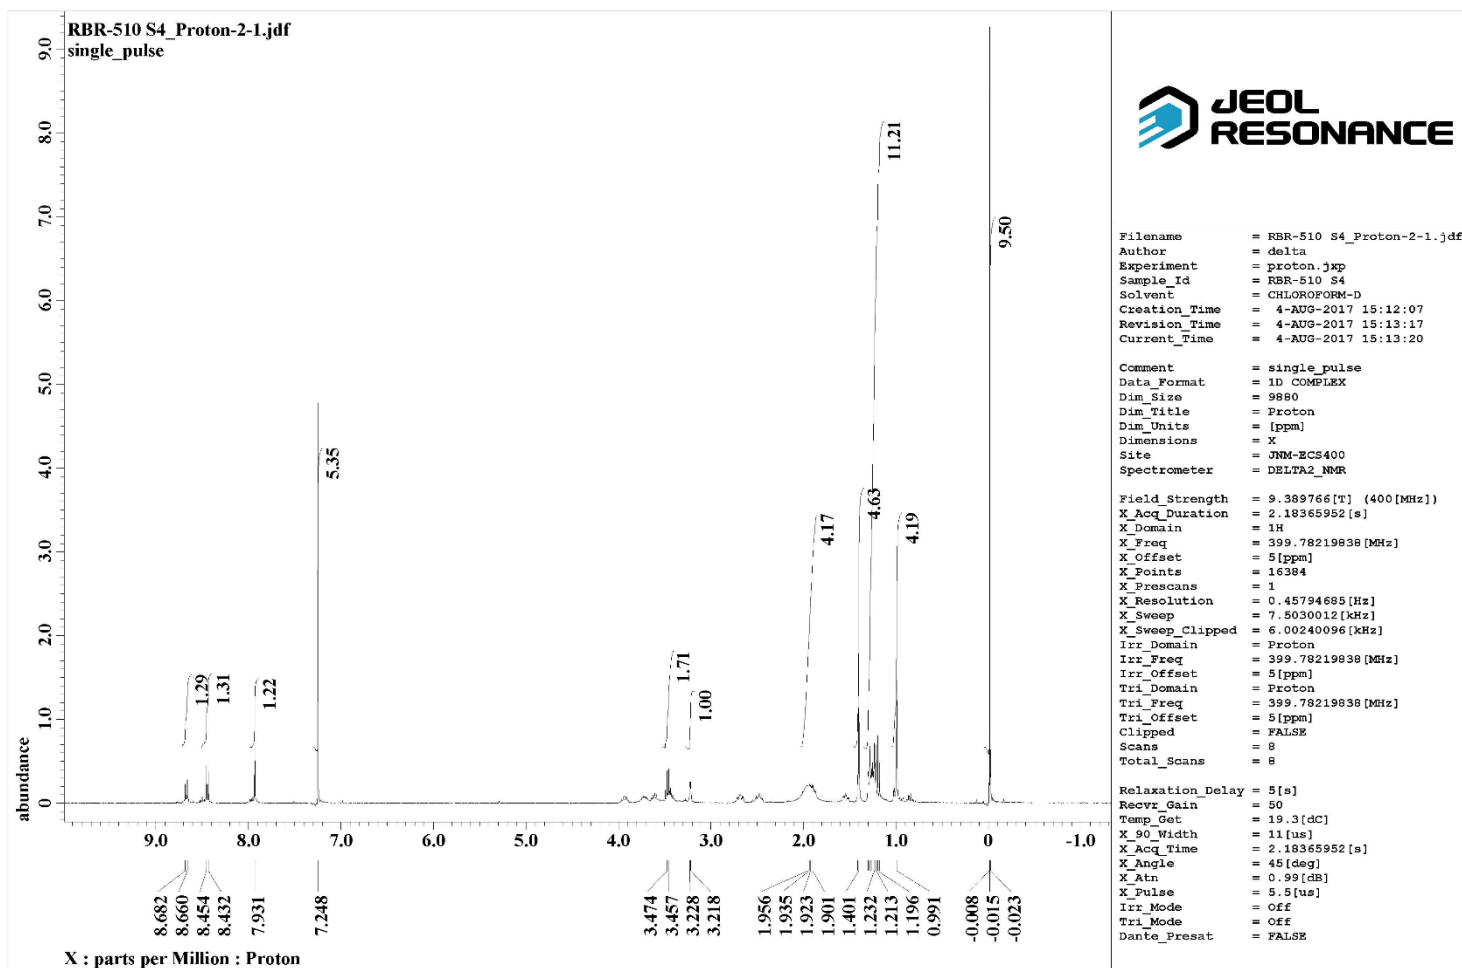

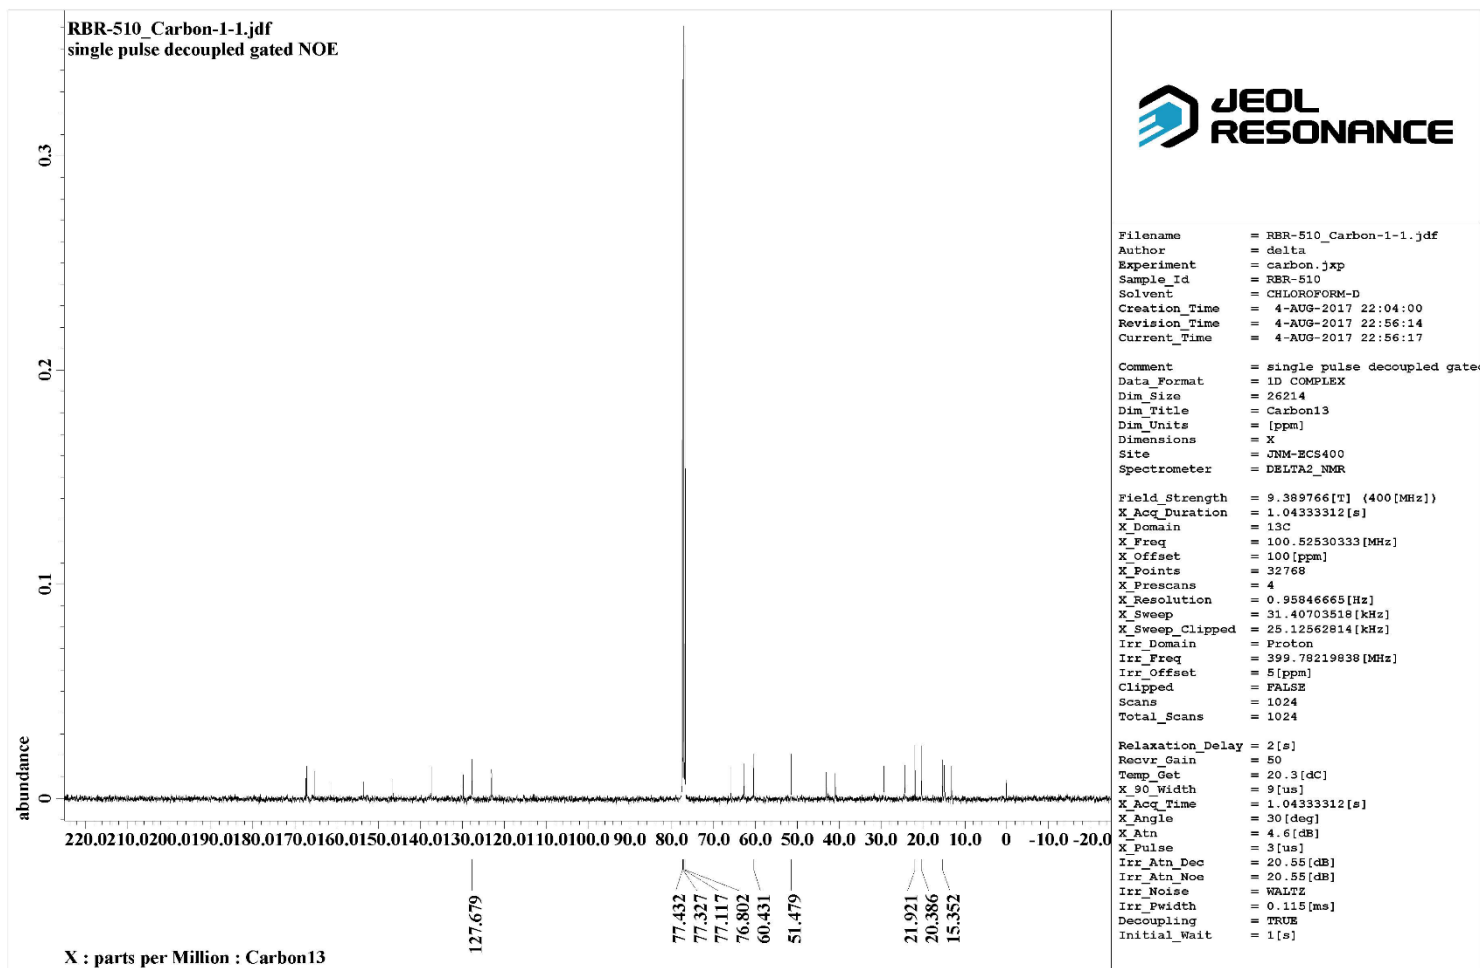

CA-BTBP ligand 17

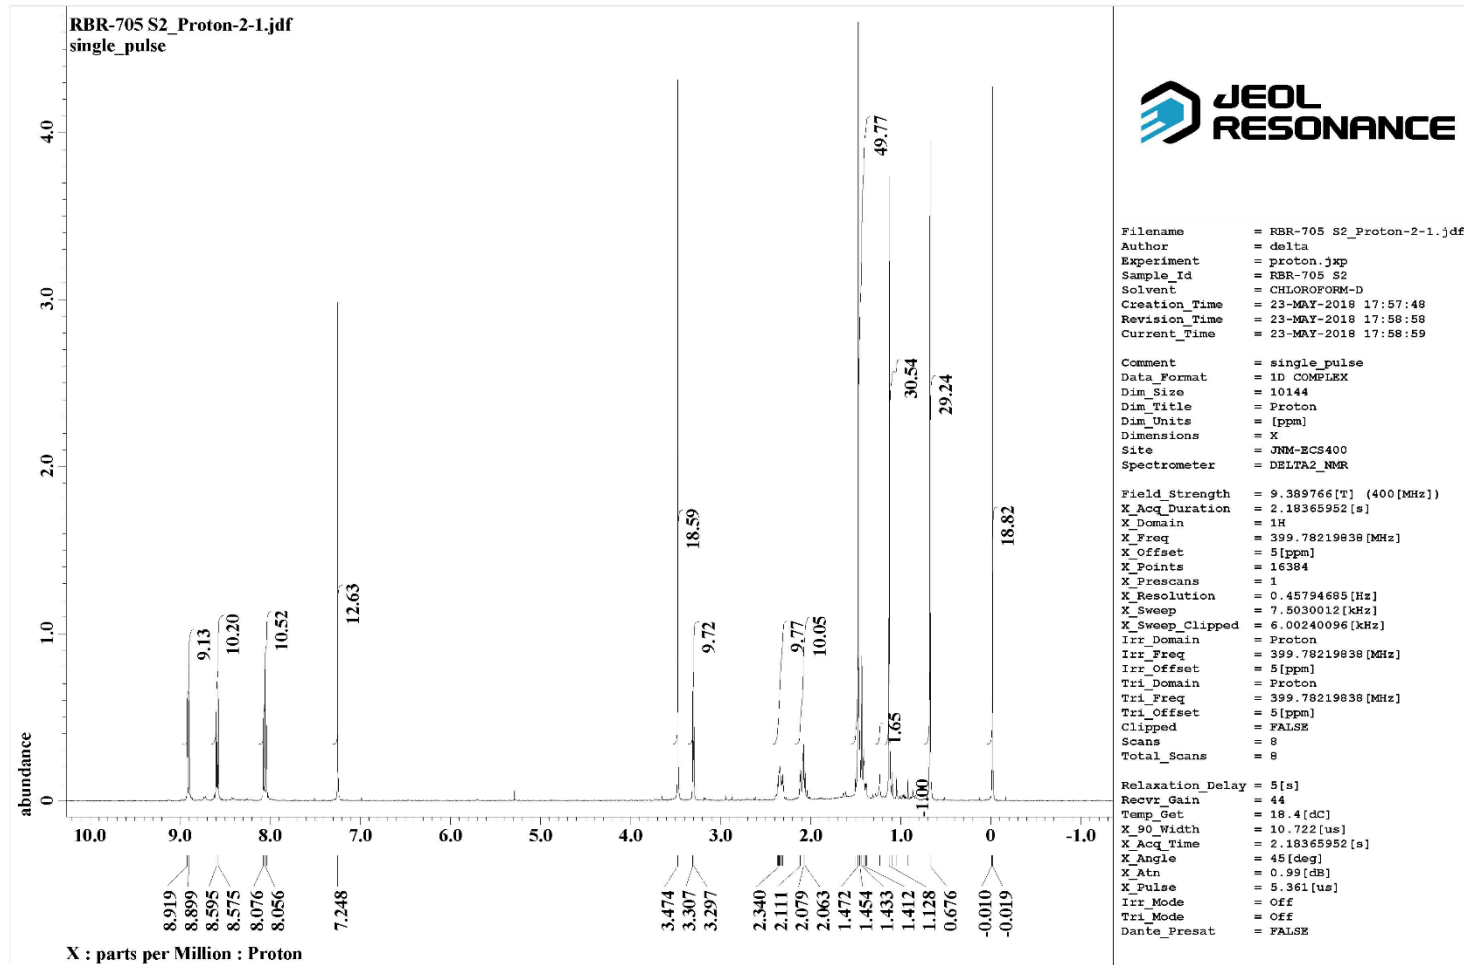

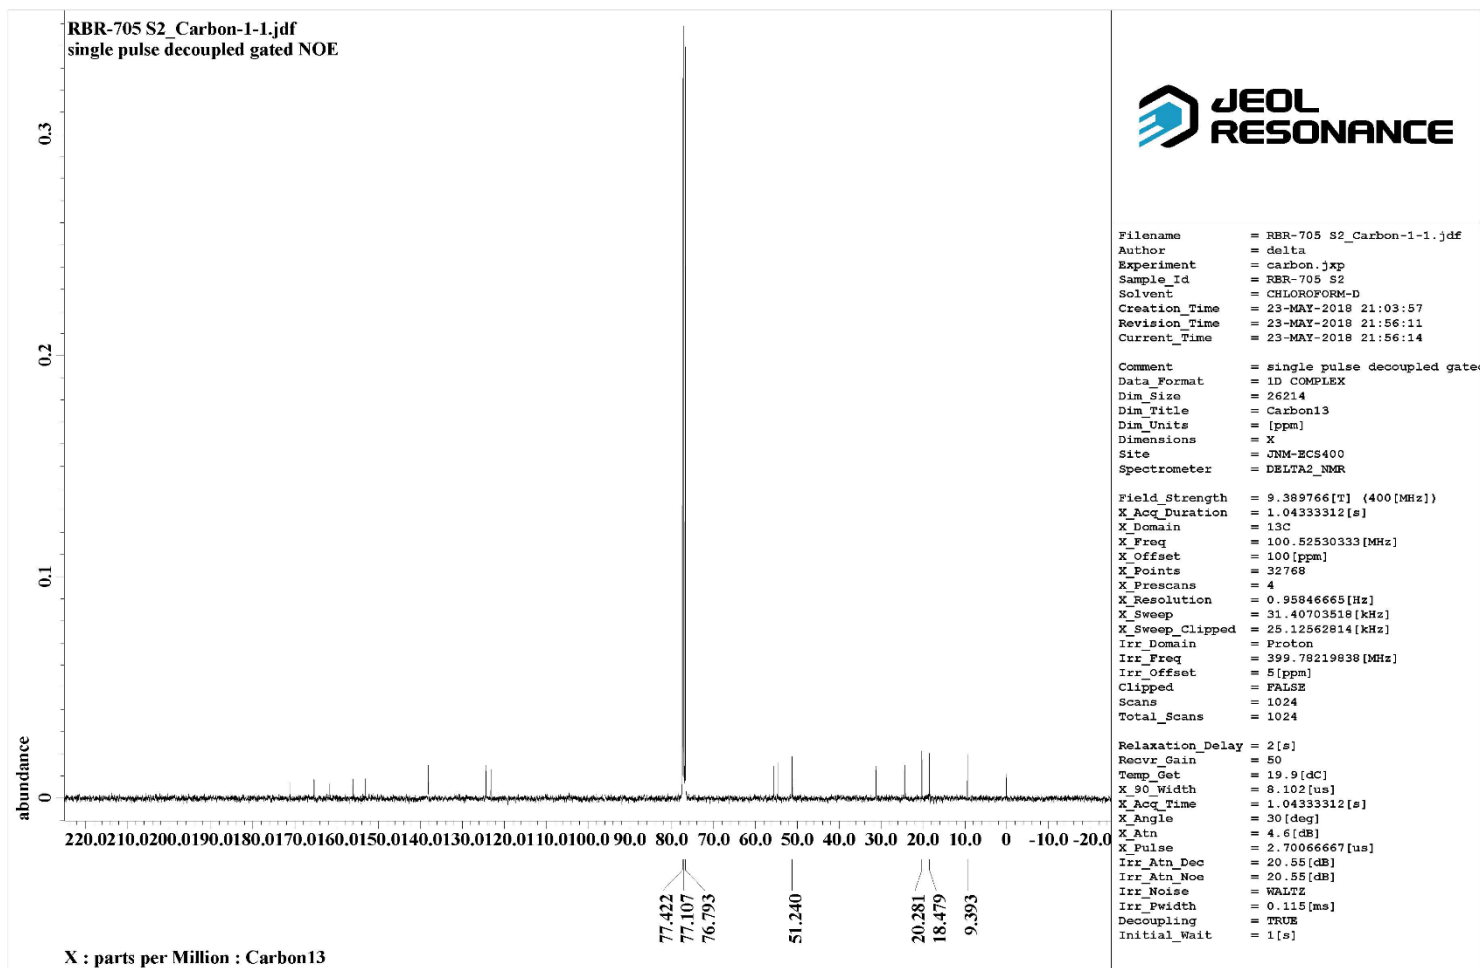

# CA-BTPhen ligand 18

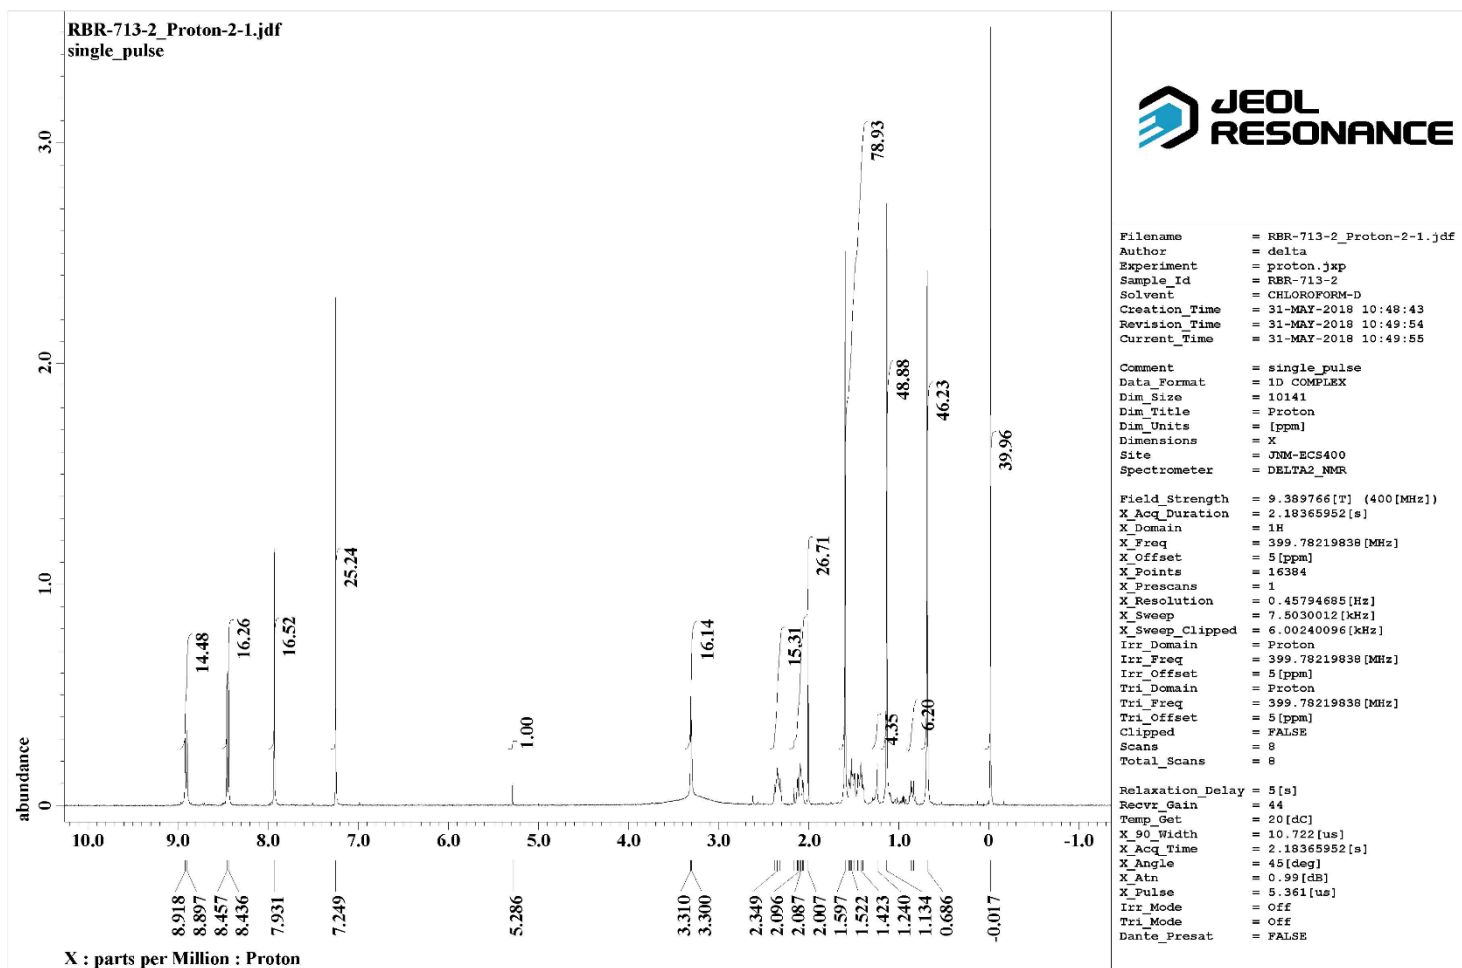

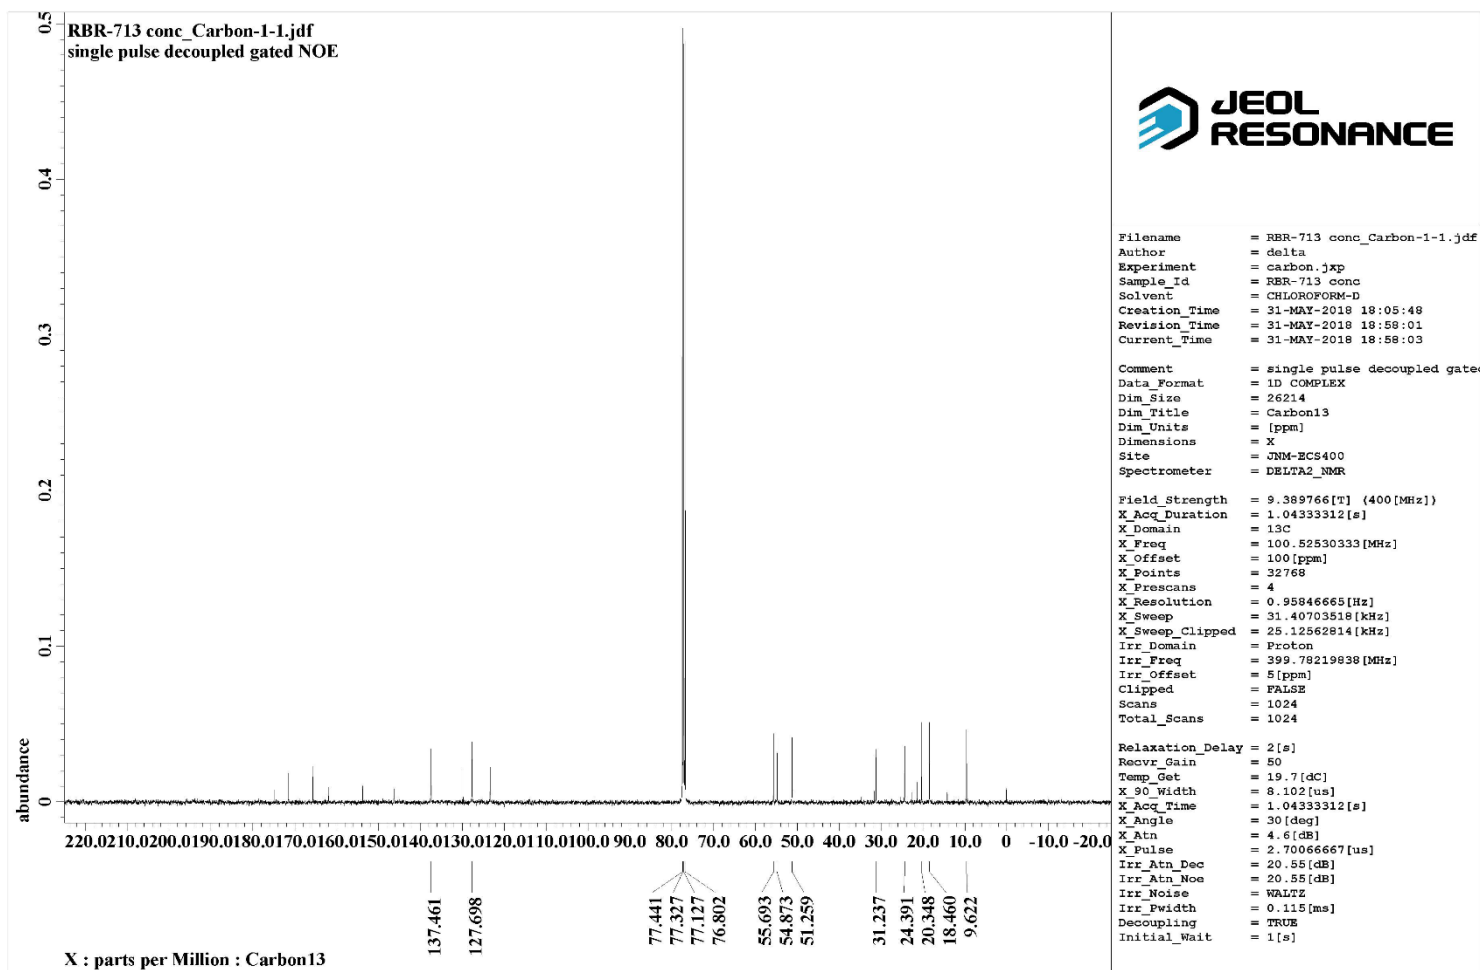



### 3: Mass Spectra

### Compound 8

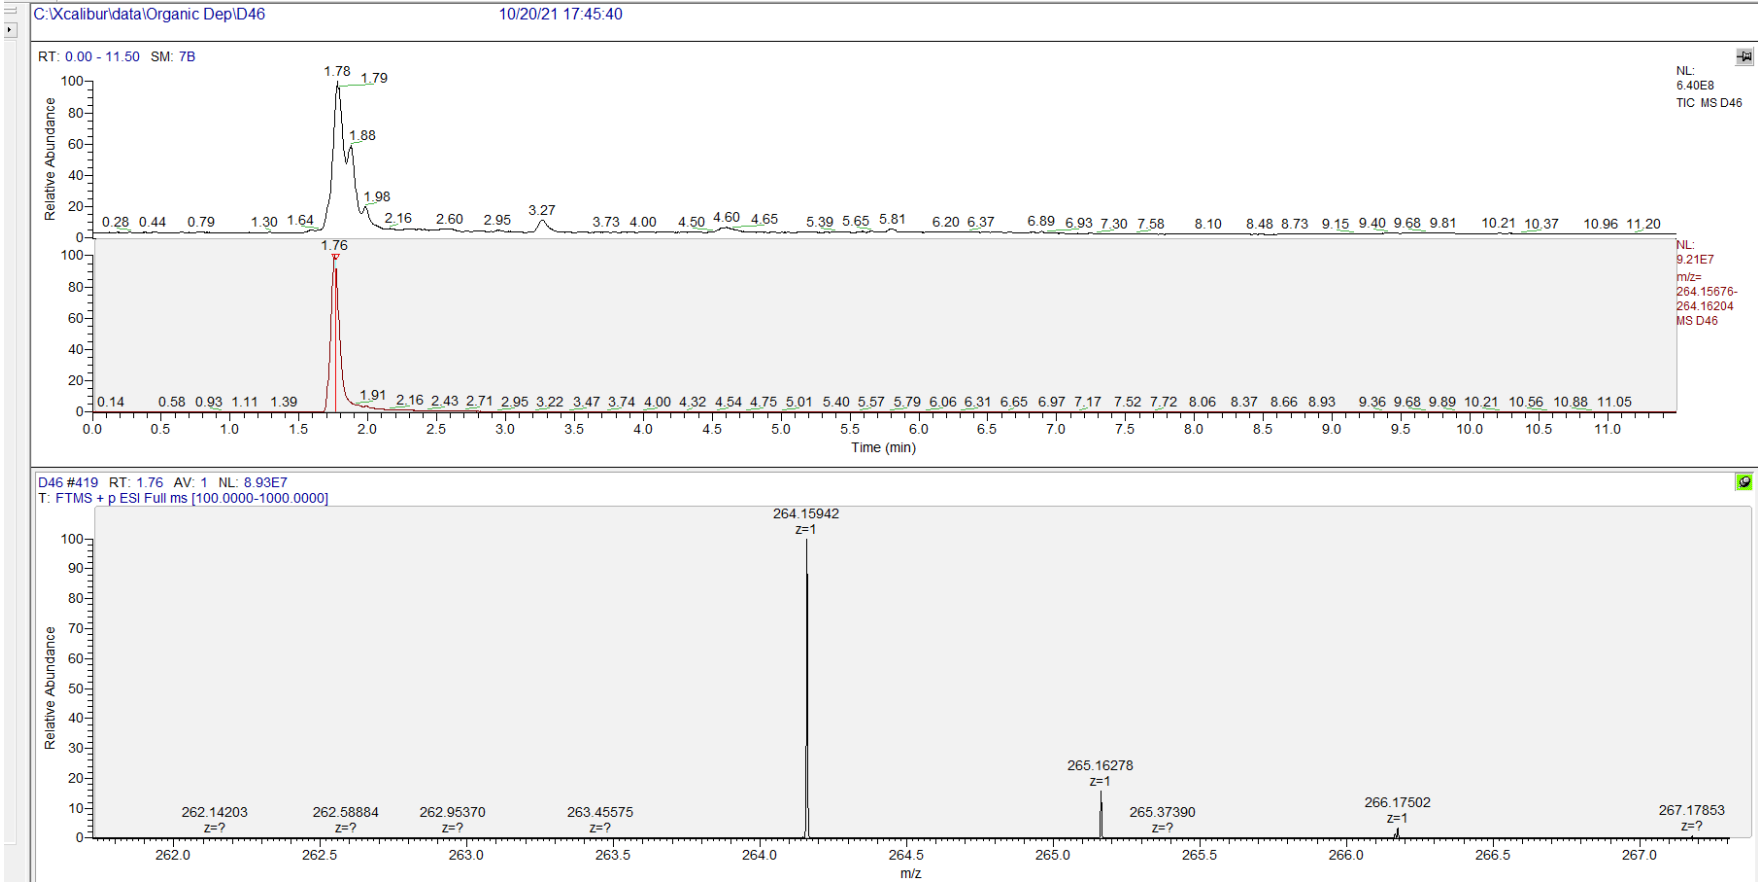

Compound 9

RBR459  
(MeOH)/MeOH+NH4OAc  
C14H19NO4

EPSRC National Facility Swansea  
LTQ Orbitrap XL

NORLEW  
26/07/2017 17:02:00

NORLEW\_3VNMV\_34510 #44-58 RT: 0.74-1.04 AV: 12 SM: 7G NL: 3.24E7  
T: FTMS + p NSI Full ms [120.00-1935.00]

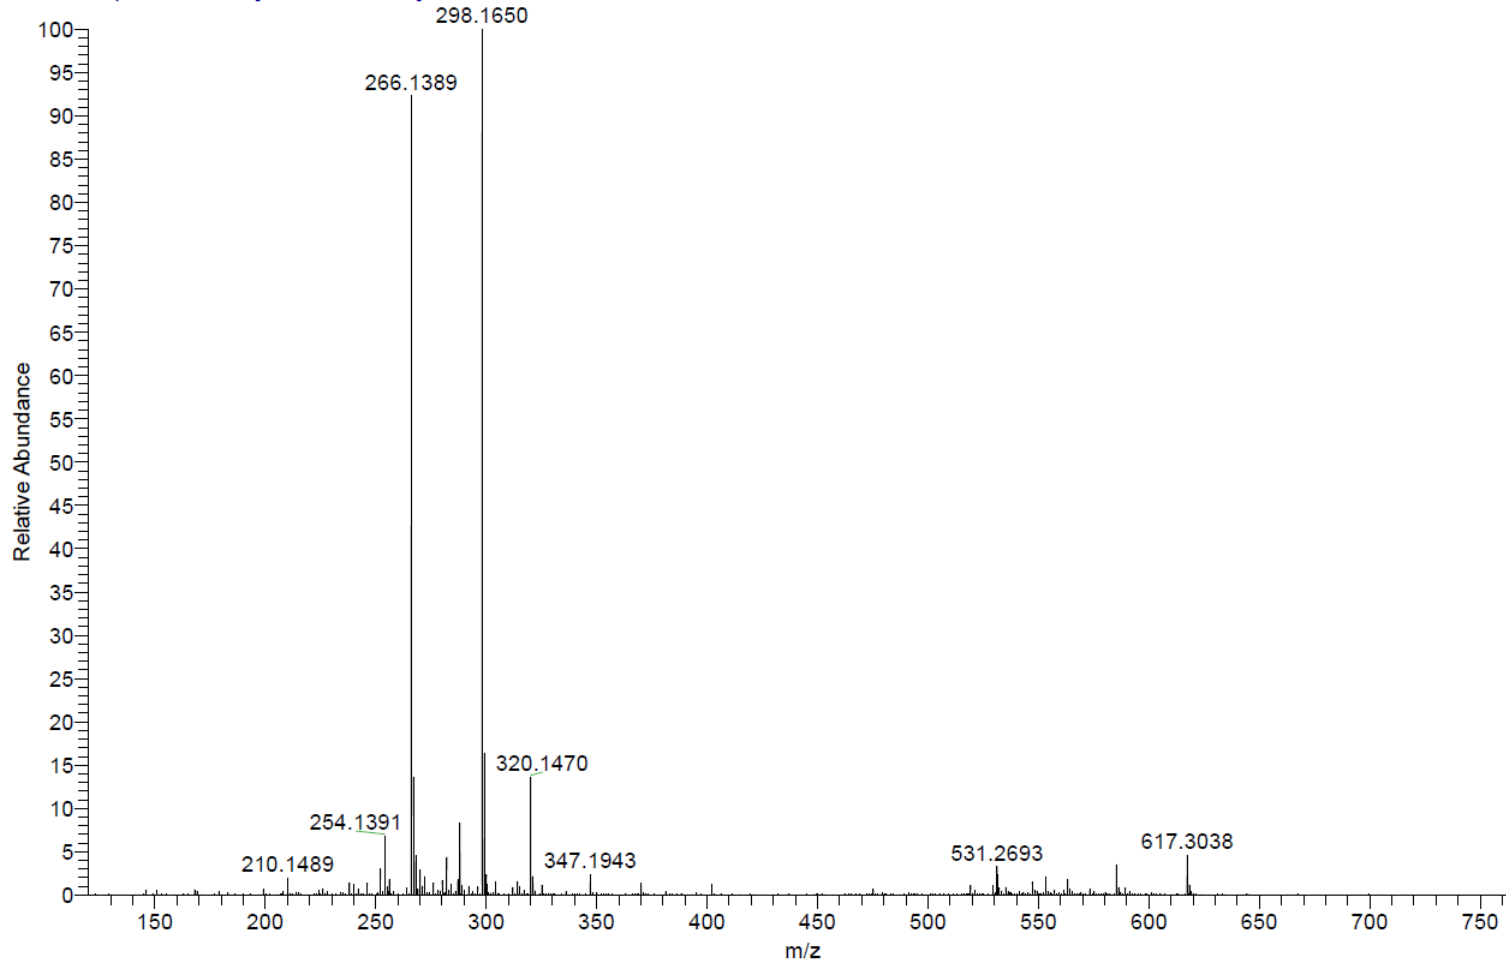

# Compound 10

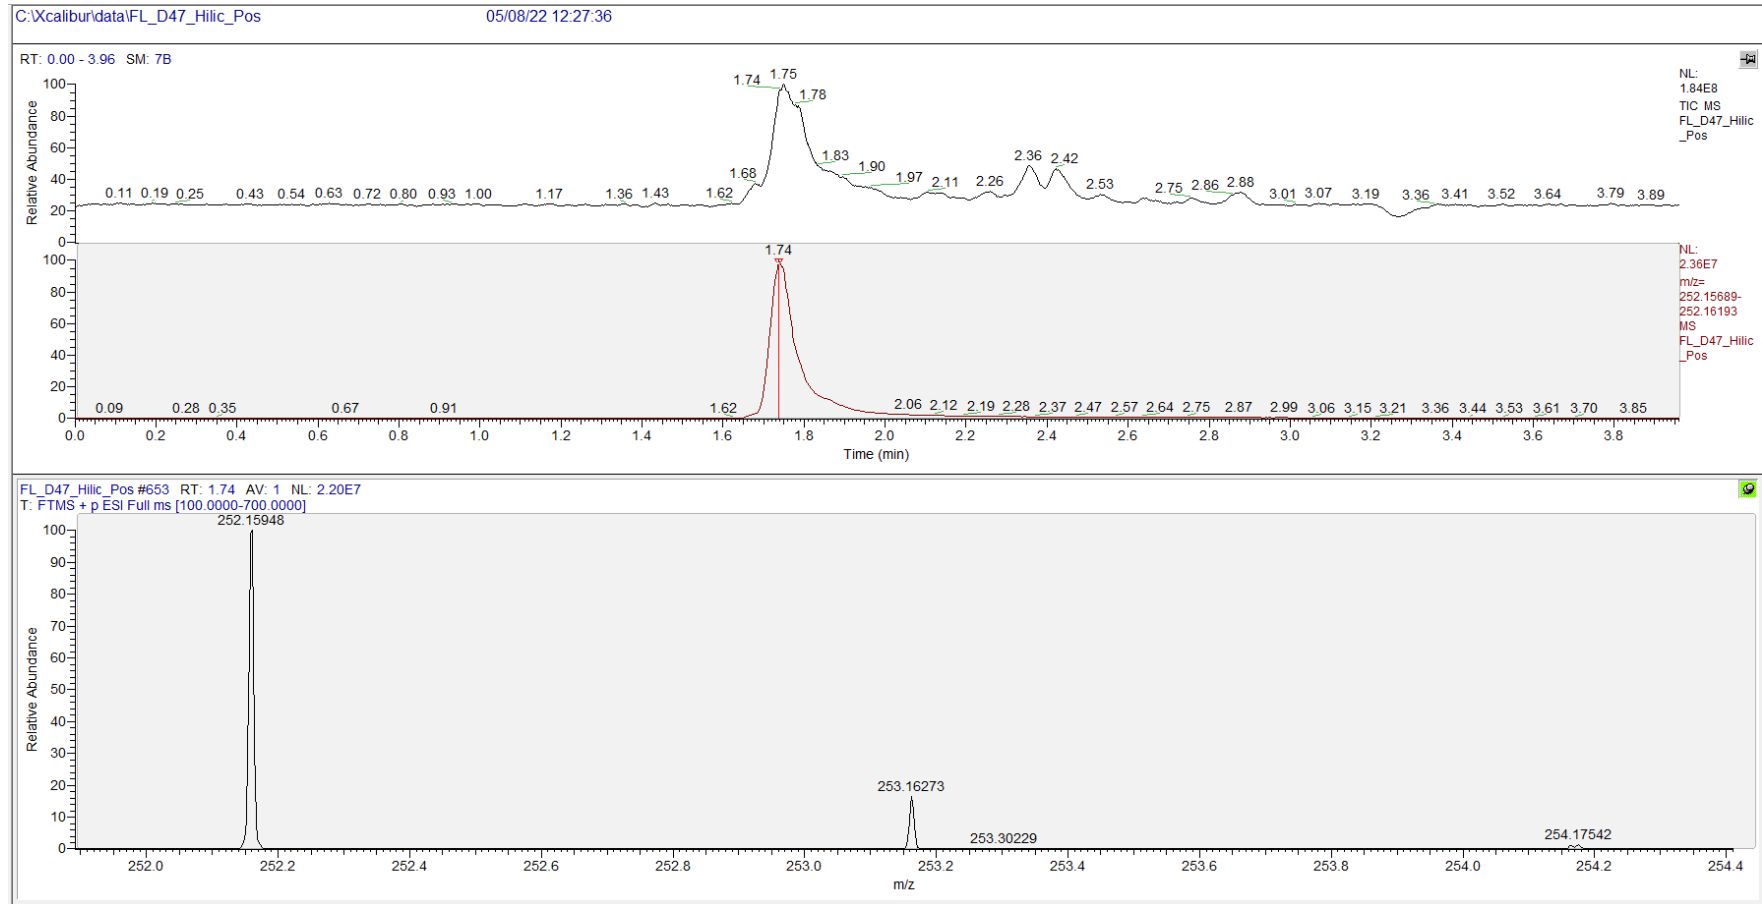

# BTPhen ligand 12

RBR524-2  
(DCM)/MeOH + NH4OAc  
C44H48N10O2

EPSRC National Facility Swansea  
LTQ Orbitrap XL

NORLEW  
08/12/2017 11:01:16

NORLEW\_3WHMK\_39675 #42-55 RT: 0.74-1.04 AV: 12 SM: 7G NL: 1.99E7  
T: FTMS + p NSI Full ms [120.00-1935.00]

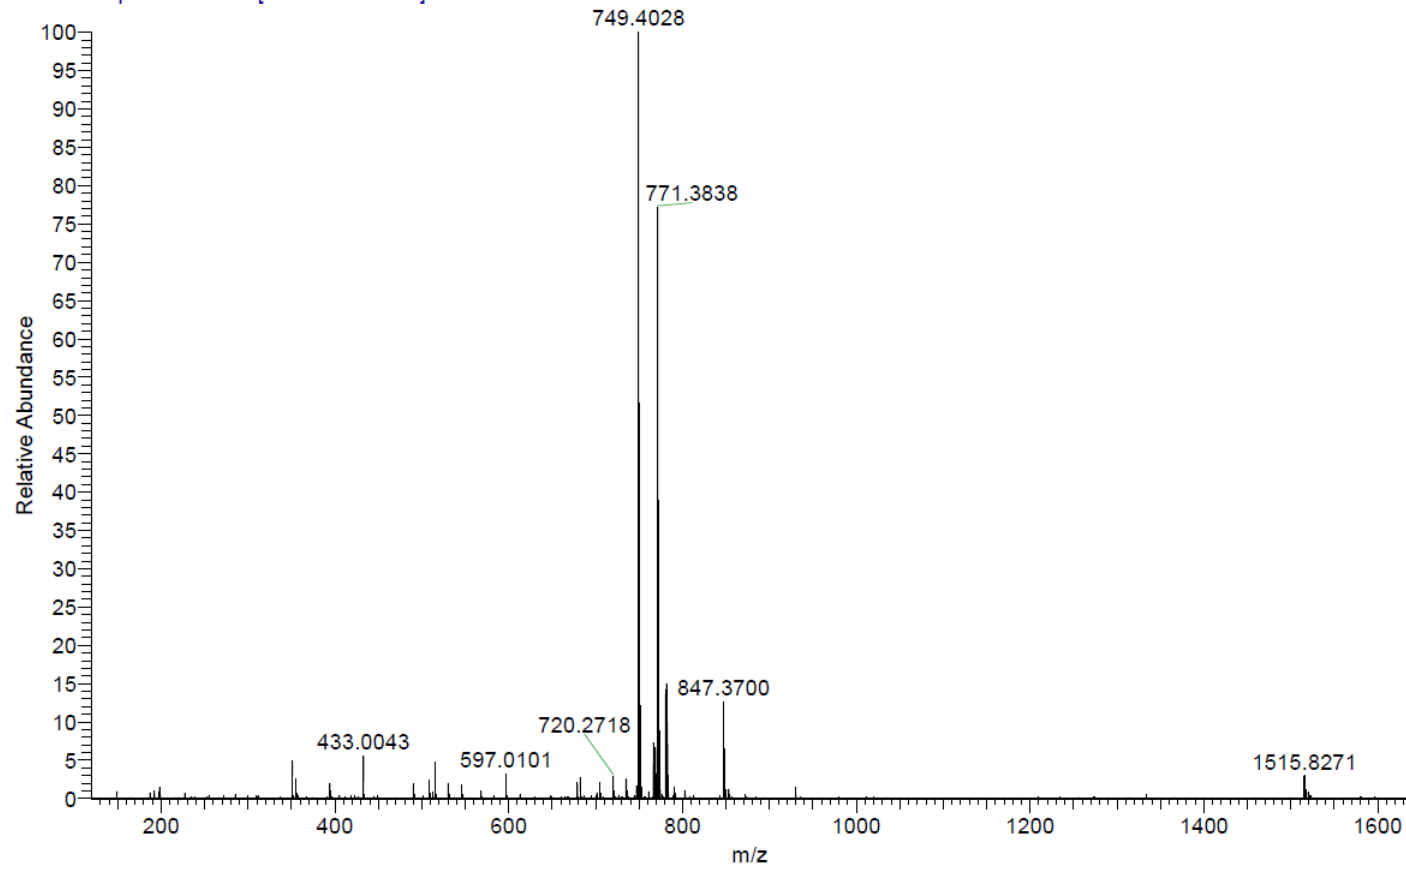

# BTPPhen ligand 13

RBR498  
(MeOH)/MeOH+NH4OAc  
C42H44N10O4

EPSRC National Facility Swansea  
LTQ Orbitrap XL

NORLEW  
16/08/2017 11:01:04

NORLEW\_3WNN9\_35286 #41-54 RT: 0.74-1.04 AV: 12 SM: 7G NL: 1.53E7  
T: FTMS + p NSI Full ms [120.00-1935.00]

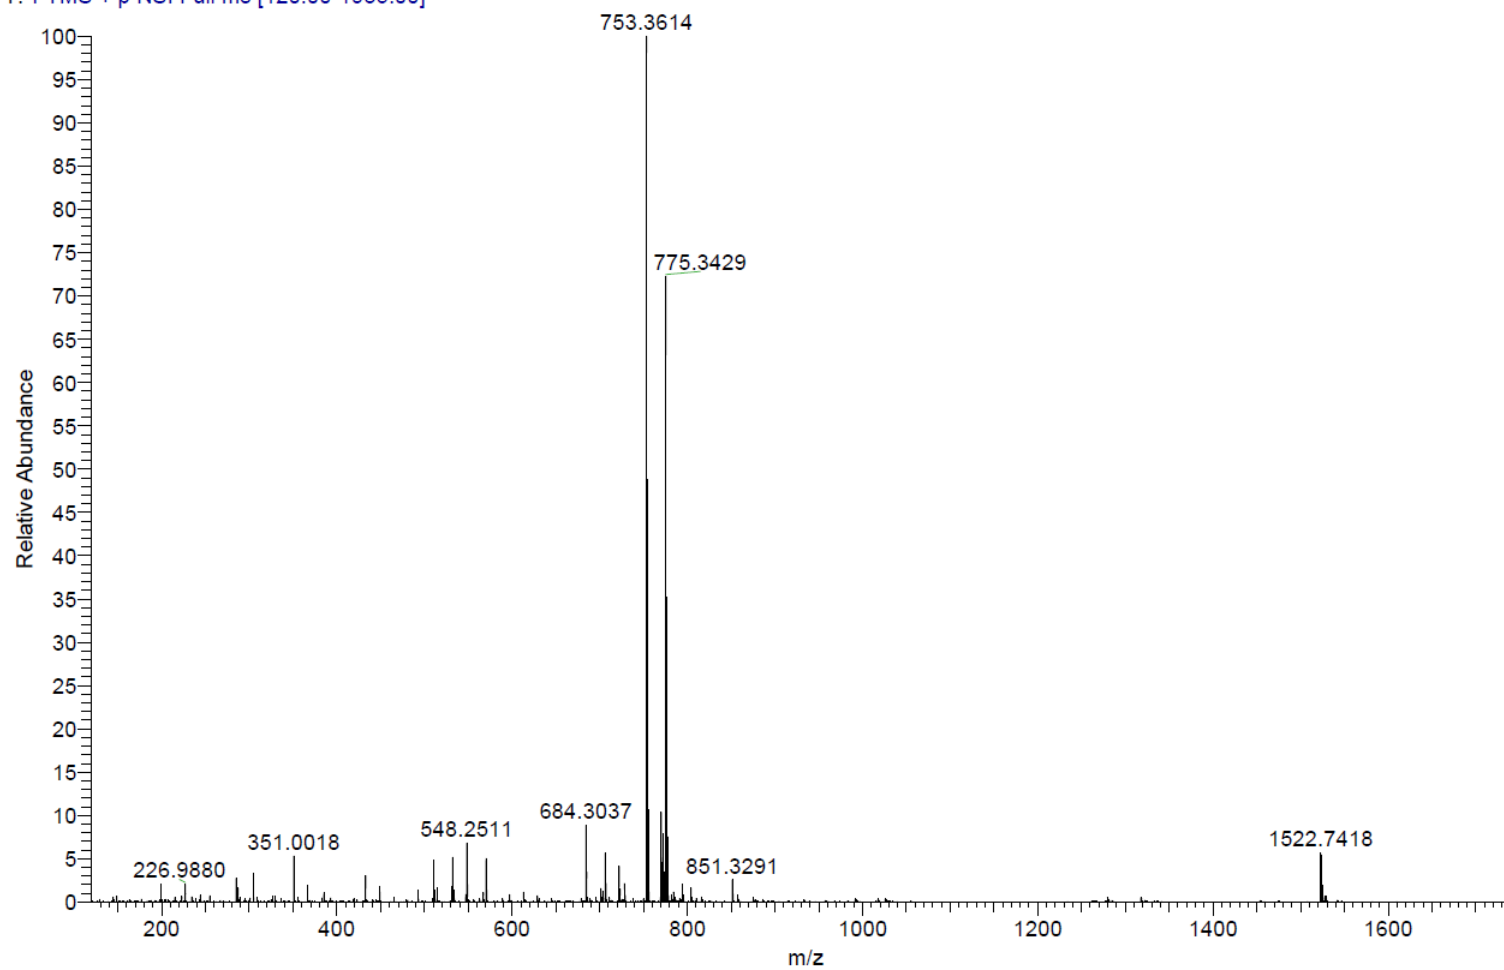

# BTPPhen ligand 14

RBR510  
(MeOH)/MeOH+NH4OAc  
C42H48N10O2

EPSRC National Facility Swansea  
LTQ Orbitrap XL

NORLEW  
16/08/2017 10:55:14

NORLEW\_3WWPE\_35288 #41-54 RT: 0.74-1.04 AV: 12 SM: 7G NL: 1.35E7  
T: FTMS + p NSI Full ms [120.00-1935.00]

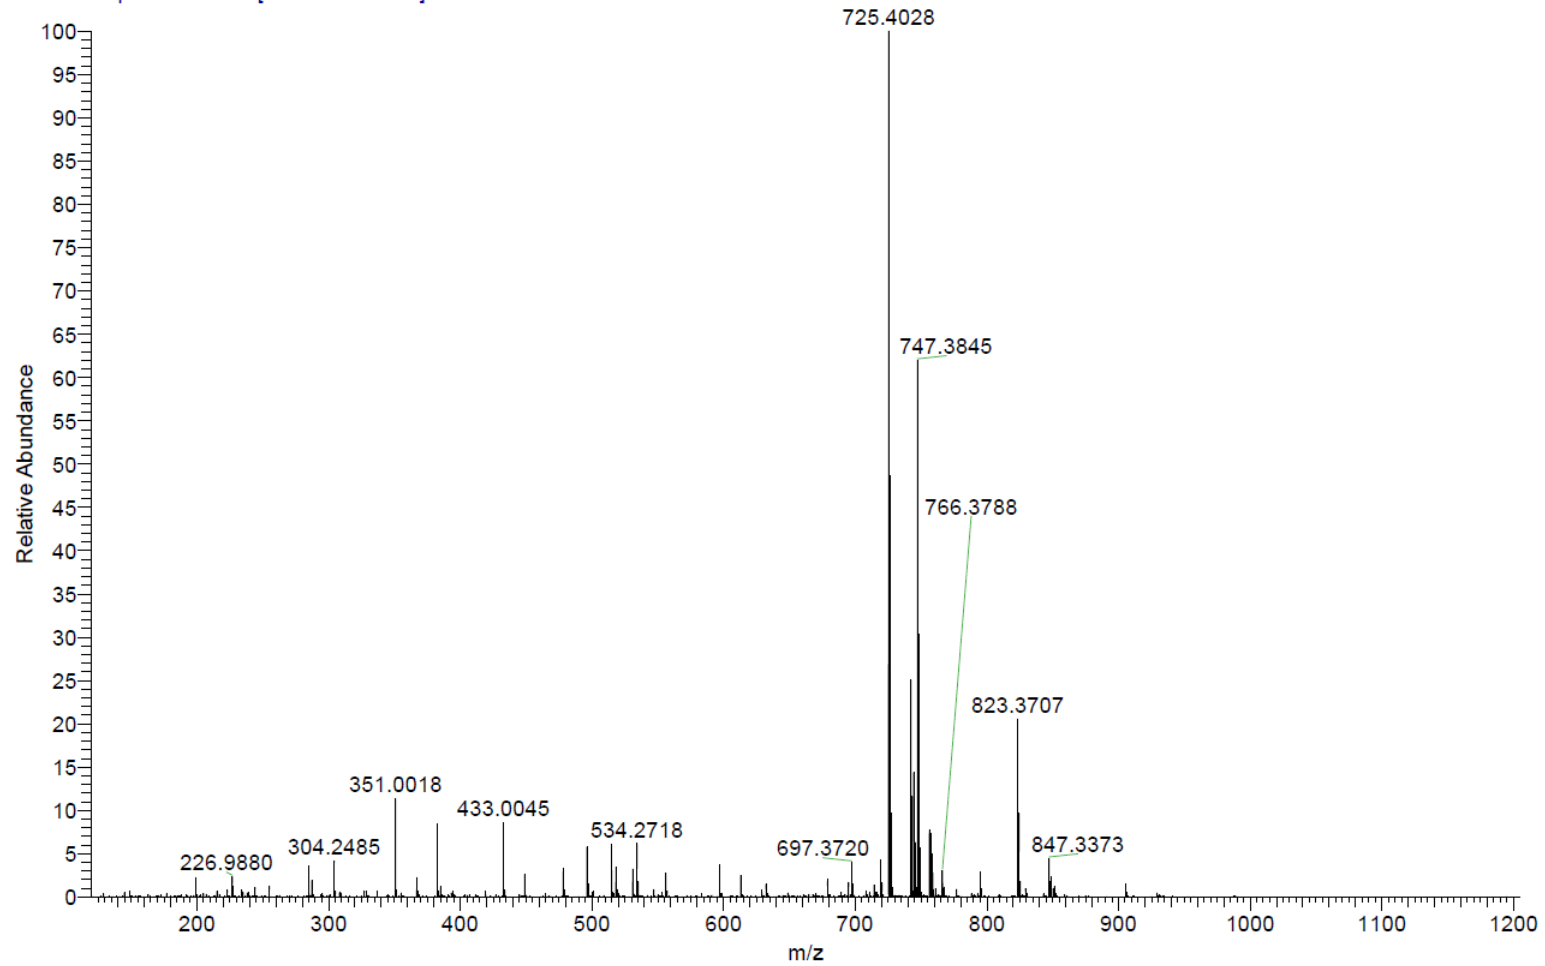

# CA-BTBP ligand 17

O:\NORLEW\_3VM3R\_46024  
(DCM)/MeOH + NH4OAc  
RBR705

EPSRC UK National MS Facility  
LTQ Orbitrap XL

C32H34N8  
11/06/2018 17:23:40

NORLEW\_3VM3R\_46024 #38-48 RT: 0.70-1.02 AV: 10 SM: 7G NL: 1.54E5  
T: FTMS + p NSI Full ms [120.00-1935.00]

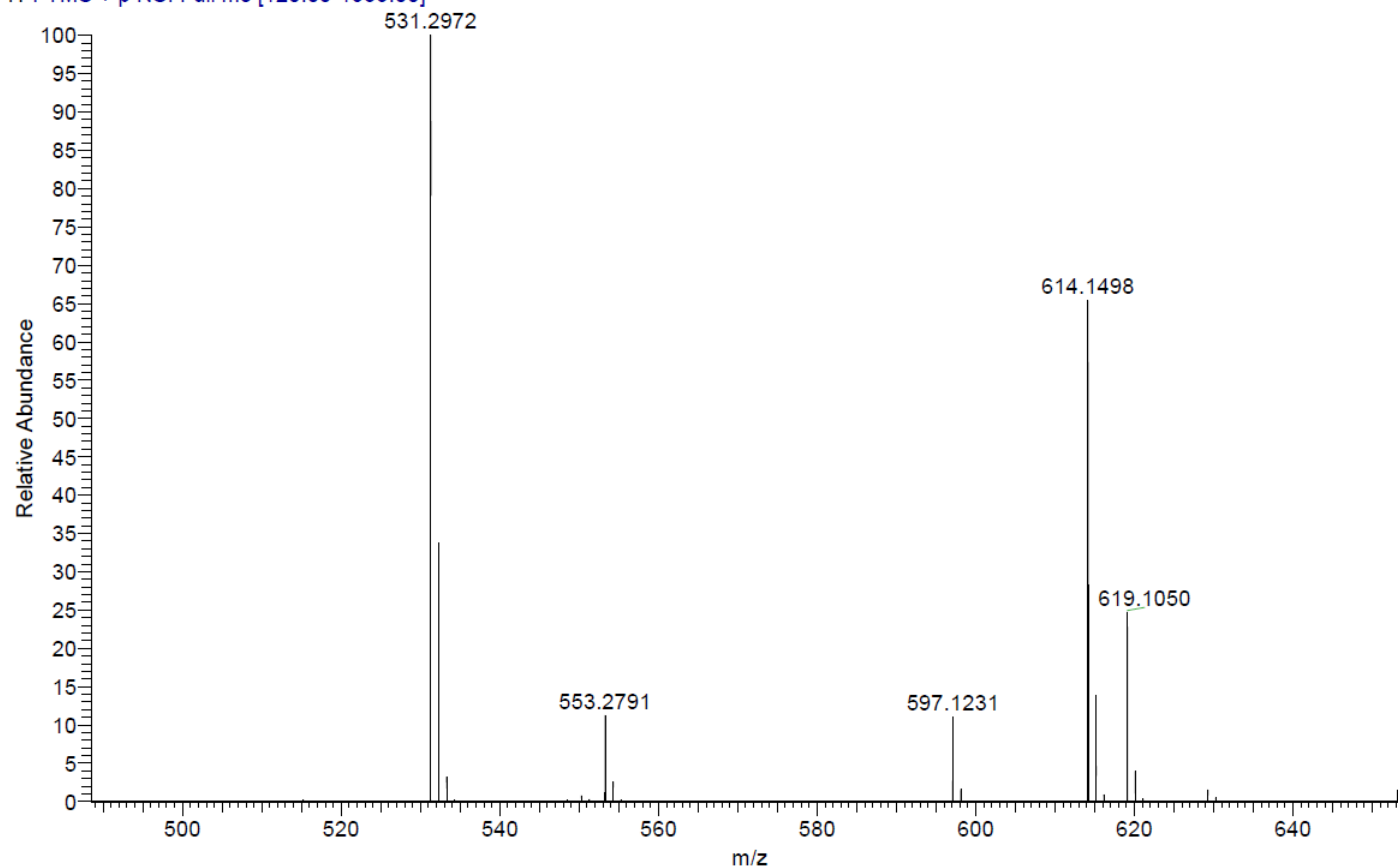

# CA-BTPhen ligand 18

RBR713  
(MeOH)/MeOH+NH4OAc  
C34H34N8

EPSRC National Facility Swansea  
LTQ Orbitrap XL

NORLEW  
06/08/2018 16:55:13

NORLEW\_3WKTT\_47726 #42-54 RT: 0.74-1.05 AV: 12 SM: 7G NL: 8.37E6  
T: FTMS + p NSI Full ms [120.00-1935.00]

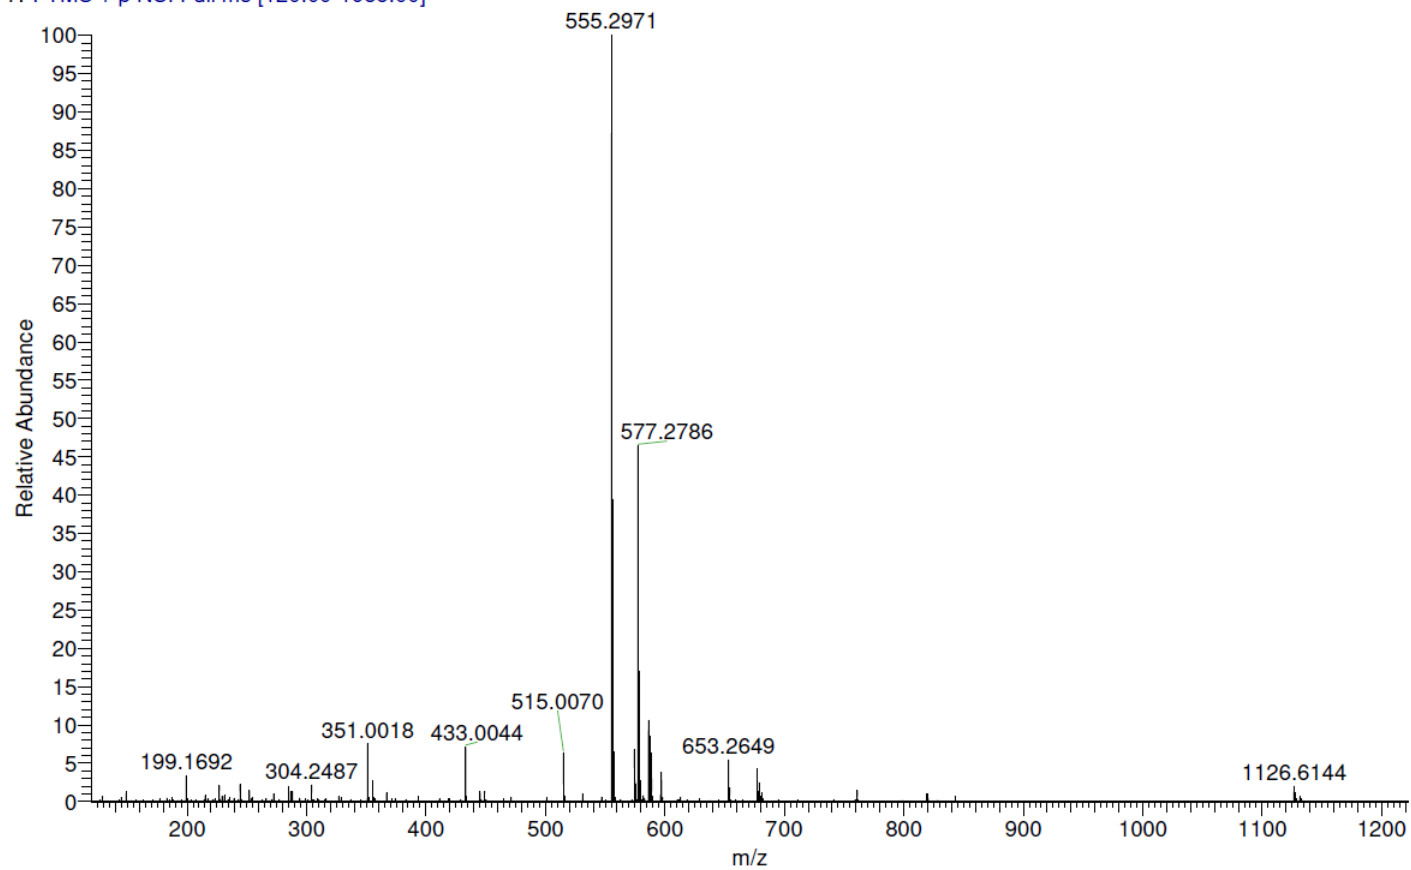



## 4: Solubility Measurements

**Table 1.** Measured solubilities of ligands **12–14**, **17** and **18** in 1-octanol.

| <b>Ligand</b>       | <b>Solubility (mM)</b> |
|---------------------|------------------------|
| <b>12</b>           | 40.9                   |
| <b>13</b>           | 41.8                   |
| <b>14</b>           | 50.4                   |
| CA-BTP <b>4</b>     | 200 <sup>a</sup>       |
| CA-BTBP <b>17</b>   | 58.1                   |
| CA-BTPhen <b>18</b> | 18.6 <sup>b</sup>      |

<sup>a</sup> Taken from ref. 9. <sup>b</sup> Taken from ref. 5.

## 5: Calculated LogP Values

**Table 2.** Calculated LogP (cLogP) values of ligands **12–14**, CA-BTP **4**, CA-BTBP **17** and CA-BTPhen **18** in the 2-phase system water/1-octanol.

| <b>Ligand</b>                      | cLogP <sup>a</sup> | cLogP <sup>b</sup> |
|------------------------------------|--------------------|--------------------|
| <b>12</b>                          | 5.95 ± 1.43        | 5.15               |
| <b>13</b>                          | 3.84 ± 1.47        | 3.45               |
| <b>14</b>                          | 5.12 ± 1.42        | 5.12               |
| CA-BTP <b>4</b>                    | 6.91 ± 0.62        | 4.35               |
| CA-BTBP <b>17</b>                  | 7.19 ± 0.63        | 4.89               |
| CA-BTPhen <b>18</b>                | 7.69 ± 1.40        | 5.50               |
| CyMe <sub>4</sub> -BTBP <b>2</b>   | 8.59 ± 0.63        | 5.56               |
| CyMe <sub>4</sub> -BTPhen <b>3</b> | 9.09 ± 1.40        | 6.03               |

<sup>a</sup> Calculated using ACD-Labs ChemSketch software ([www.acdlabs.com](http://www.acdlabs.com)).

<sup>b</sup> Calculated using SwissADME ([www.swissadme.ch](http://www.swissadme.ch)).

## 6: Solvent Extraction Studies

### 6.1 Extraction Studies for BTPPhen Ligand 12

**Table 3.** Extraction of Am(III) and Eu(III) by 10 mM BTPPhen ligand **12** into 1-octanol as a function of the initial nitric acid concentration of the aqueous phase. Results are from gamma spectrometry ( $D$  = distribution ratio, SF = separation factor, contact time: 60 min, temperature:  $22\text{ }^{\circ}\text{C} \pm 1\text{ }^{\circ}\text{C}$ ).

| [HNO <sub>3</sub> ] initial (mol/L) | $D_{\text{Am}}$ | $D_{\text{Eu}}$ | SF <sub>Am/Eu</sub> |
|-------------------------------------|-----------------|-----------------|---------------------|
| 0.01                                | 2.0             | 0.18            | 11.4                |
| 0.11                                | 18.9            | 0.45            | 42.1                |
| 0.30                                | 44.2            | 0.87            | 51.1                |
| 0.70                                | 54.9            | 0.75            | 73.6                |
| 1.03                                | 55.2            | 0.59            | 94.1                |
| 3.11                                | 43.0            | 0.19            | 230.9               |

**Table 4.** Extraction of Am(III) and Cm(III) by 10 mM BTPPhen ligand **12** into 1-octanol as a function of the initial nitric acid concentration of the aqueous phase. Results are from alpha spectrometry ( $D$  = distribution ratio, SF = separation factor, contact time: 60 min, temperature:  $22\text{ }^{\circ}\text{C} \pm 1\text{ }^{\circ}\text{C}$ ).

| [HNO <sub>3</sub> ] initial (mol/L) | $D_{\text{Am}}$ | $D_{\text{Cm}}$ | SF <sub>Am/Cm</sub> |
|-------------------------------------|-----------------|-----------------|---------------------|
| 0.01                                | 1.6             | 1.2             | 1.4                 |
| 0.11                                | 9.5             | 9.1             | 1.1                 |
| 0.30                                | 28.1            | 24.4            | 1.2                 |
| 0.70                                | 16.4            | 14.8            | 1.1                 |
| 1.03                                | 19.3            | 16.8            | 1.2                 |
| 3.11                                | 31.6            | 16.6            | 1.9                 |

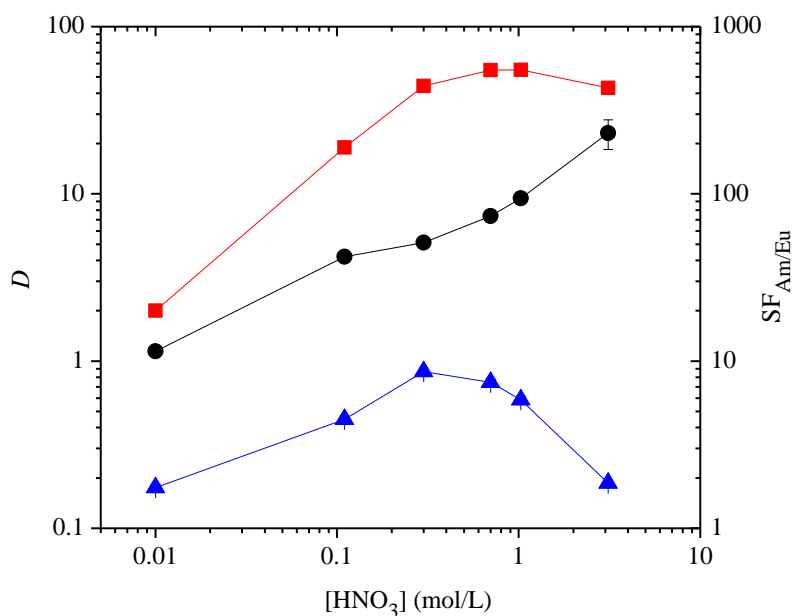

**Figure 2.** Extraction of Am(III) and Eu(III) by BTPPhen ligand **12** (0.01 M) into 1-octanol as a function of the initial nitric acid concentration of the aqueous phase ( $D$  = distribution ratio, SF = separation factor,  $\blacksquare$  =  $D_{Am}$ ,  $\blacktriangle$  =  $D_{Eu}$ ,  $\bullet$  =  $SF_{Am/Eu}$ , contact time: 60 min, temperature:  $22\text{ }^{\circ}\text{C} \pm 1\text{ }^{\circ}\text{C}$ ).

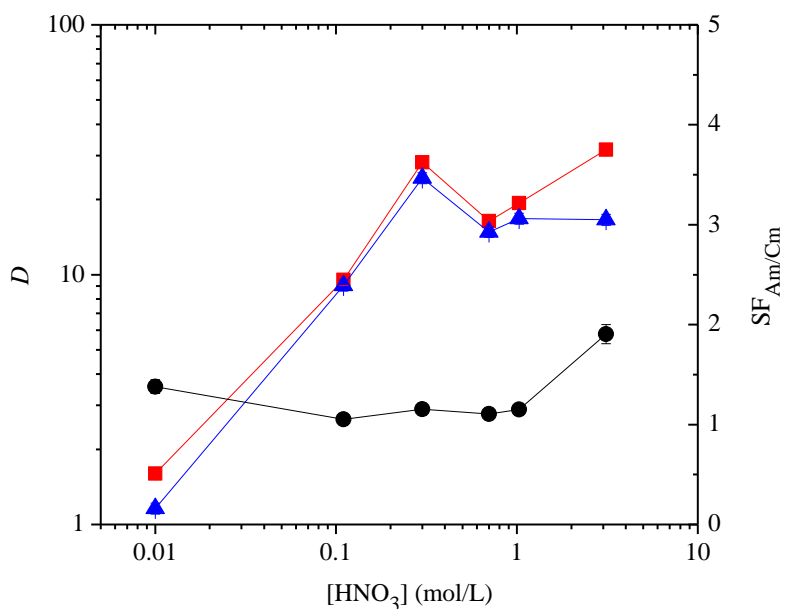

**Figure 3.** Extraction of Am(III) and Cm(III) by BTPPhen ligand **12** (0.01 M) into 1-octanol as a function of the initial nitric acid concentration of the aqueous phase ( $D$  = distribution ratio, SF = separation factor,  $\blacksquare$  =  $D_{Am}$ ,  $\blacktriangle$  =  $D_{Cm}$ ,  $\bullet$  =  $SF_{Am/Cm}$ , contact time: 60 min, temperature:  $22\text{ }^{\circ}\text{C} \pm 1\text{ }^{\circ}\text{C}$ ).

**Table 5.** Extraction of Am(III) and Eu(III) from 1.03 M nitric acid by 10 mM BTPPhen ligand **12** into 1-octanol as a function of contact time. Results are from gamma spectrometry ( $D$  = distribution ratio, SF = separation factor, temperature: 22 °C ± 1 °C).

| Contact time (min) | $D_{Am}$ | $D_{Eu}$ | SF <sub>Am/Eu</sub> |
|--------------------|----------|----------|---------------------|
| 5                  | 59.8     | 0.89     | 67.4                |
| 10                 | 59.9     | 0.87     | 69.1                |
| 15                 | 66.9     | 0.91     | 73.5                |
| 30                 | 67.8     | 0.87     | 78.1                |
| 60                 | 121.7    | 1.72     | 70.8                |
| 120                | 74.1     | 0.89     | 82.9                |

**Table 6.** Extraction of Am(III) and Cm(III) from 1.03 M nitric acid by 10 mM BTPPhen ligand **12** into 1-octanol as a function of contact time. Results are from alpha spectrometry ( $D$  = distribution ratio, SF = separation factor, temperature: 22 °C ± 1 °C).

| Contact time (min) | $D_{Am}$ | $D_{Cm}$ | SF <sub>Am/Cm</sub> |
|--------------------|----------|----------|---------------------|
| 5                  | 39.8     | 33.7     | 1.2                 |
| 10                 | 17.1     | 15.9     | 1.1                 |
| 15                 | 36.7     | 31.6     | 1.2                 |
| 30                 | 59.6     | 45.7     | 1.3                 |
| 60                 | 21.0     | 18.1     | 1.2                 |
| 120                | 32.2     | 28.1     | 1.2                 |

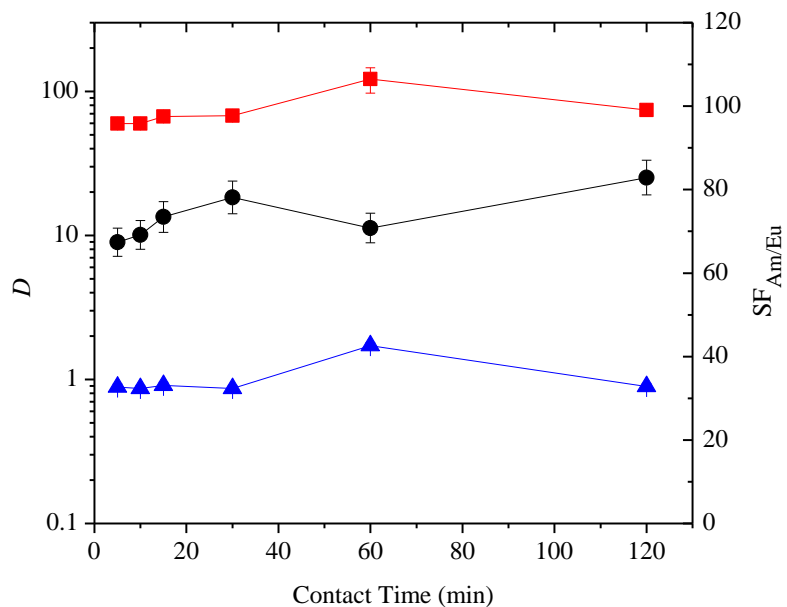

**Figure 4.** Extraction of Am(III) and Eu(III) from 1.03 M nitric acid by BTPhen ligand **12** (0.01 M) into 1-octanol as a function of contact time ( $D$  = distribution ratio, SF = separation factor,  $\blacksquare$  =  $D_{Am}$ ,  $\blacktriangle$  =  $D_{Eu}$ ,  $\bullet$  =  $SF_{Am/Eu}$ , temperature:  $22\text{ }^{\circ}\text{C} \pm 1\text{ }^{\circ}\text{C}$ ).

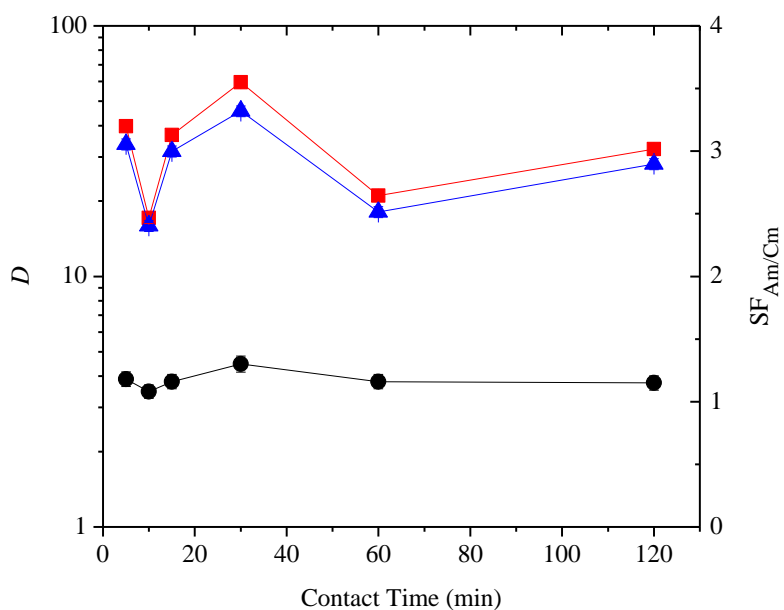

**Figure 5.** Extraction of Am(III) and Cm(III) from 1.03 M nitric acid by BTPhen ligand **12** (0.01 M) into 1-octanol as a function of contact time ( $D$  = distribution ratio, SF = separation factor,  $\blacksquare$  =  $D_{Am}$ ,  $\blacktriangle$  =  $D_{Cm}$ ,  $\bullet$  =  $SF_{Am/Cm}$ , temperature:  $22\text{ }^{\circ}\text{C} \pm 1\text{ }^{\circ}\text{C}$ ).

**Table 7.** Extraction of Y(III) and all the trivalent lanthanides (except Pm) by 10 mM BTPPhen ligand **12** into 1-octanol as a function of the initial nitric acid concentration of the aqueous phase. Results are from ICP-MS ( $D$  = distribution ratio, SF = separation factor, contact time: 60 min, temperature:  $22\text{ }^{\circ}\text{C} \pm 1\text{ }^{\circ}\text{C}$ ).

| [HNO <sub>3</sub> ] (mol/L) |               | 0.01 | 0.11 | 0.30 | 0.70 | 1.03 | 3.11 |
|-----------------------------|---------------|------|------|------|------|------|------|
| Element                     | Atomic Number | $D$  | $D$  | $D$  | $D$  | $D$  | $D$  |
| Y                           | 39            | 0.01 | 0.02 | 0.03 | 0.03 | 0.03 | 0.03 |
| La                          | 57            | 0.01 | 0.04 | 0.08 | 0.06 | 0.06 | 0.03 |
| Ce                          | 58            | 0.06 | 0.22 | 0.42 | 0.31 | 0.32 | 0.09 |
| Pr                          | 59            | 0.13 | 0.42 | 0.82 | 0.59 | 0.62 | 0.17 |
| Nd                          | 60            | 0.18 | 0.57 | 1.09 | 0.78 | 0.83 | 0.22 |
| Sm                          | 62            | 0.27 | 0.67 | 1.29 | 0.90 | 0.93 | 0.26 |
| Eu                          | 63            | 0.24 | 0.57 | 1.09 | 0.78 | 0.80 | 0.22 |
| Gd                          | 64            | 0.16 | 0.32 | 0.63 | 0.47 | 0.49 | 0.15 |
| Tb                          | 65            | 0.17 | 0.42 | 0.89 | 0.69 | 0.74 | 0.25 |
| Dy                          | 66            | 0.14 | 0.43 | 0.92 | 0.75 | 0.84 | 0.31 |
| Ho                          | 67            | 0.11 | 0.43 | 0.91 | 0.77 | 0.88 | 0.35 |
| Er                          | 68            | 0.10 | 0.46 | 0.98 | 0.81 | 0.93 | 0.40 |
| Tm                          | 69            | 0.09 | 0.51 | 0.97 | 0.73 | 0.80 | 0.36 |
| Yb                          | 70            | 0.09 | 0.68 | 1.06 | 0.62 | 0.62 | 0.26 |
| Lu                          | 71            | 0.11 | 0.70 | 0.99 | 0.47 | 0.43 | 0.16 |

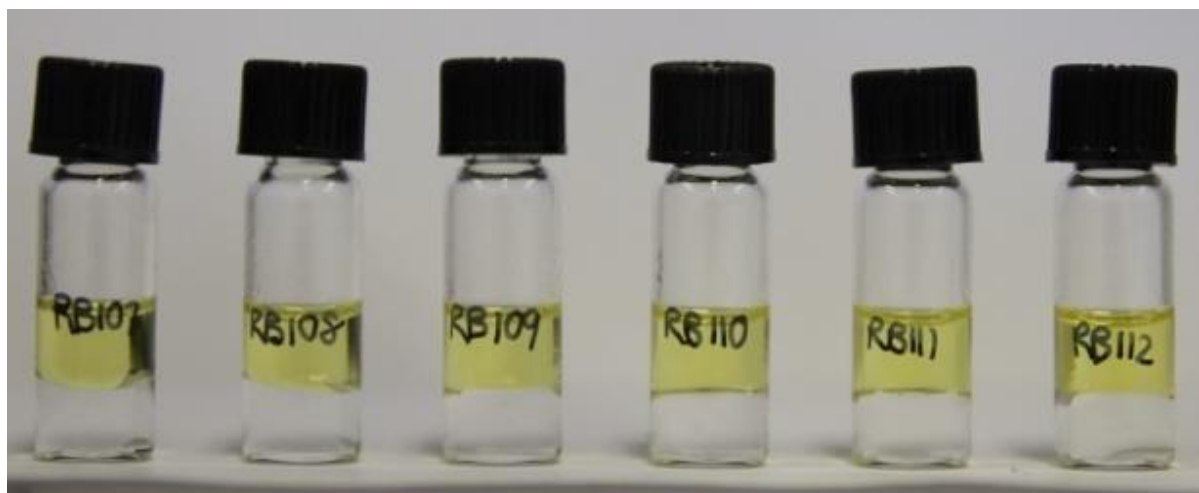

**Figure 6.** Photograph of the sample tubes from the extraction of Am(III), Cm(III) and Eu(III) by 10 mM BTPhen ligand **12** into 1-octanol as a function of the initial nitric acid concentration of the aqueous phase, with increasing  $[\text{HNO}_3]$  going from left to right.



## 6.2 Extraction Studies for BTPPhen Ligand 13

**Table 8.** Extraction of Am(III) and Eu(III) by 10 mM BTPPhen ligand **13** into 1-octanol as a function of the initial nitric acid concentration of the aqueous phase. Results are from gamma spectrometry ( $D$  = distribution ratio,  $SF$  = separation factor, contact time: 60 min, temperature:  $22\text{ }^{\circ}\text{C} \pm 1\text{ }^{\circ}\text{C}$ ). Results from alpha spectrometry for ligand **13** were not obtained due to the precipitation observed during the extraction experiments.

| [HNO <sub>3</sub> ] initial (mol/L) | $D_{\text{Am}}$ | $D_{\text{Eu}}$ | $SF_{\text{Am/Eu}}$ |
|-------------------------------------|-----------------|-----------------|---------------------|
| 0.01                                | 0.01            | 0.11            | 0.1                 |
| 0.11                                | 0.03            | 0.05            | 0.7                 |
| 0.30                                | 0.06            | 0.09            | 0.7                 |
| 0.70                                | 0.08            | 0.10            | 0.8                 |
| 1.03                                | 0.08            | 0.09            | 0.9                 |
| 3.11                                | 0.19            | 0.04            | 5.1                 |

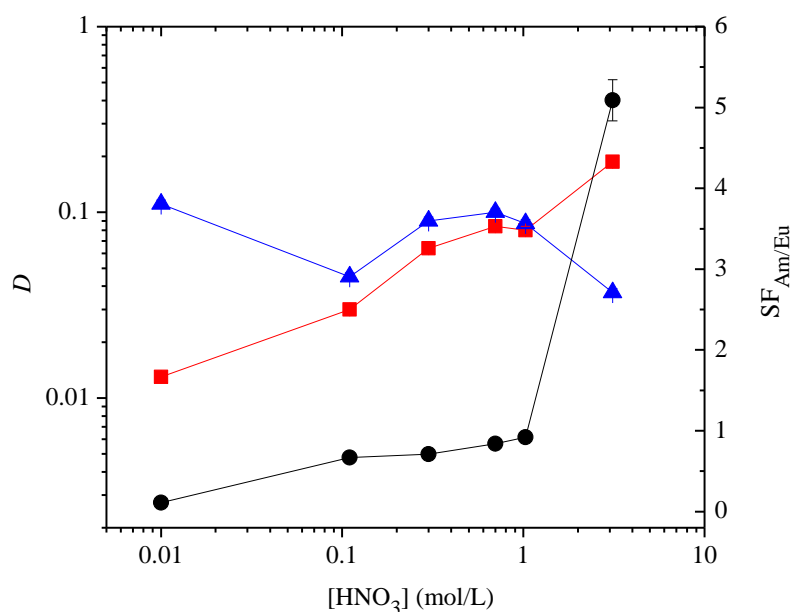

**Figure 7.** Extraction of Am(III) and Eu(III) by BTPPhen ligand **13** (0.01 M) into 1-octanol as a function of the initial nitric acid concentration of the aqueous phase ( $D$  = distribution ratio,  $SF$  = separation factor,  $\blacksquare$  =  $D_{\text{Am}}$ ,  $\blacktriangle$  =  $D_{\text{Eu}}$ ,  $\bullet$  =  $SF_{\text{Am/Eu}}$ , contact time: 60 min, temperature:  $22\text{ }^{\circ}\text{C} \pm 1\text{ }^{\circ}\text{C}$ ). Results from alpha spectrometry for ligand **13** were not obtained due to the precipitation observed during the extraction experiments.

**Table 9.** Extraction of Y(III) and all the trivalent lanthanides (except Pm) by 10 mM BTPPhen ligand **13** into 1-octanol as a function of the initial nitric acid concentration of the aqueous phase. Results are from ICP-MS ( $D$  = distribution ratio, SF = separation factor, contact time: 60 min, temperature: 22 °C  $\pm$  1 °C).

| [HNO <sub>3</sub> ] (mol/L) |               | 0.01 | 0.11 | 0.30 | 0.70 | 1.03 | 3.11 |
|-----------------------------|---------------|------|------|------|------|------|------|
| Element                     | Atomic Number | $D$  | $D$  | $D$  | $D$  | $D$  | $D$  |
| Y                           | 39            | 0.05 | 0.01 | 0.03 | 0.02 | 0.02 | 0.01 |
| La                          | 57            | 0.04 | 0.02 | 0.02 | 0.02 | 0.02 | 0.01 |
| Ce                          | 58            | 0.05 | 0.02 | 0.03 | 0.03 | 0.03 | 0.02 |
| Pr                          | 59            | 0.05 | 0.02 | 0.03 | 0.03 | 0.03 | 0.03 |
| Nd                          | 60            | 0.05 | 0.02 | 0.04 | 0.04 | 0.05 | 0.03 |
| Sm                          | 62            | 0.11 | 0.04 | 0.09 | 0.09 | 0.09 | 0.05 |
| Eu                          | 63            | 0.15 | 0.06 | 0.12 | 0.13 | 0.11 | 0.05 |
| Gd                          | 64            | 0.16 | 0.06 | 0.14 | 0.13 | 0.11 | 0.04 |
| Tb                          | 65            | 0.16 | 0.07 | 0.17 | 0.17 | 0.15 | 0.06 |
| Dy                          | 66            | 0.13 | 0.07 | 0.16 | 0.16 | 0.14 | 0.07 |
| Ho                          | 67            | 0.09 | 0.06 | 0.14 | 0.14 | 0.13 | 0.06 |
| Er                          | 68            | 0.07 | 0.06 | 0.13 | 0.14 | 0.13 | 0.08 |
| Tm                          | 69            | 0.07 | 0.06 | 0.13 | 0.13 | 0.13 | 0.08 |
| Yb                          | 70            | 0.07 | 0.06 | 0.13 | 0.13 | 0.12 | 0.07 |
| Lu                          | 71            | 0.08 | 0.06 | 0.13 | 0.12 | 0.11 | 0.06 |

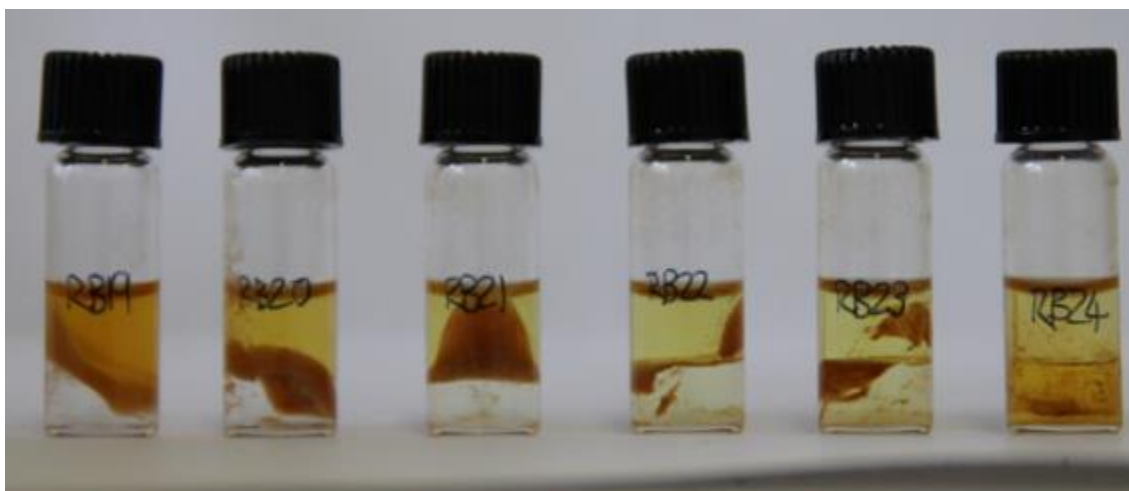

**Figure 8.** Photograph of the sample tubes from the extraction of Am(III), Cm(III) and Eu(III) by 10 mM BTPPhen ligand **13** into 1-octanol as a function of the initial nitric acid concentration of the aqueous phase, with increasing  $[\text{HNO}_3]$  going from left to right.

### 6.3 Extraction Studies for BTPPhen Ligand 14

**Table 10.** Extraction of Am(III) and Eu(III) by 10 mM BTPPhen ligand **14** into 1-octanol as a function of the initial nitric acid concentration of the aqueous phase. Results are from gamma spectrometry ( $D$  = distribution ratio, SF = separation factor, contact time: 60 min, temperature:  $22\text{ }^{\circ}\text{C} \pm 1\text{ }^{\circ}\text{C}$ ).

| [HNO <sub>3</sub> ] initial (mol/L) | $D_{\text{Am}}$ | $D_{\text{Eu}}$ | SF <sub>Am/Eu</sub> |
|-------------------------------------|-----------------|-----------------|---------------------|
| 0.01                                | 0.96            | 0.12            | 8.3                 |
| 0.11                                | 11.4            | 1.42            | 8.0                 |
| 0.30                                | 28.4            | 2.76            | 10.3                |
| 0.70                                | 35.6            | 2.21            | 16.1                |
| 1.03                                | 41.8            | 1.74            | 24.1                |
| 3.11                                | 70.0            | 0.63            | 111.8               |

**Table 11.** Extraction of Am(III) and Cm(III) by 10 mM BTPPhen ligand **14** into 1-octanol as a function of the initial nitric acid concentration of the aqueous phase. Results are from alpha spectrometry ( $D$  = distribution ratio, SF = separation factor, contact time: 60 min, temperature:  $22\text{ }^{\circ}\text{C} \pm 1\text{ }^{\circ}\text{C}$ ).

| [HNO <sub>3</sub> ] initial (mol/L) | $D_{\text{Am}}$ | $D_{\text{Cm}}$ | SF <sub>Am/Cm</sub> |
|-------------------------------------|-----------------|-----------------|---------------------|
| 0.01                                | 0.94            | 0.92            | 1.0                 |
| 0.11                                | 9.2             | 12.7            | 0.8                 |
| 0.30                                | 18.0            | 19.0            | 0.9                 |
| 0.70                                | 30.3            | 29.6            | 1.0                 |
| 1.03                                | 33.0            | 31.1            | 1.1                 |
| 3.11                                | 49.6            | 44.4            | 1.1                 |

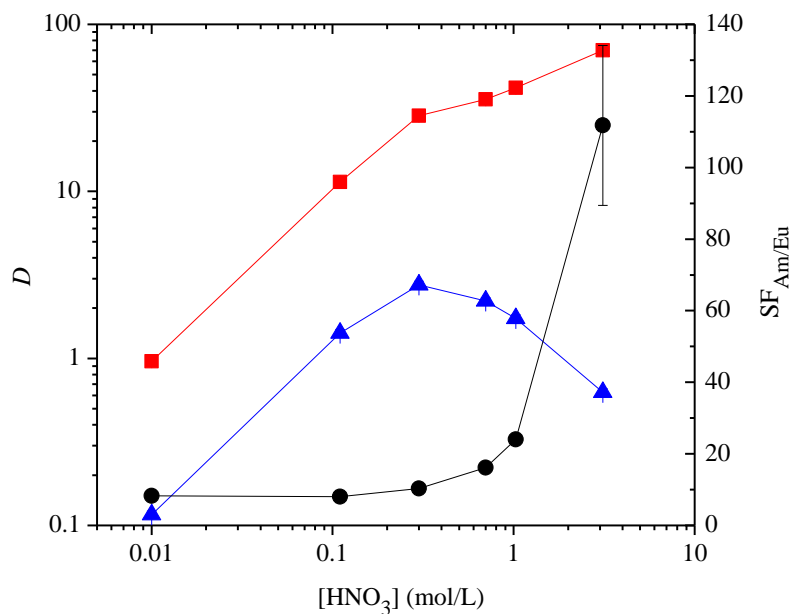

**Figure 9.** Extraction of Am(III) and Eu(III) by BTPPhen ligand **14** (0.01 M) into 1-octanol as a function of the initial nitric acid concentration of the aqueous phase ( $D$  = distribution ratio, SF = separation factor, ■ =  $D_{Am}$ , ▲ =  $D_{Eu}$ , ● =  $SF_{Am/Eu}$ , contact time: 60 min, temperature:  $22 \text{ }^{\circ}\text{C} \pm 1 \text{ }^{\circ}\text{C}$ ).

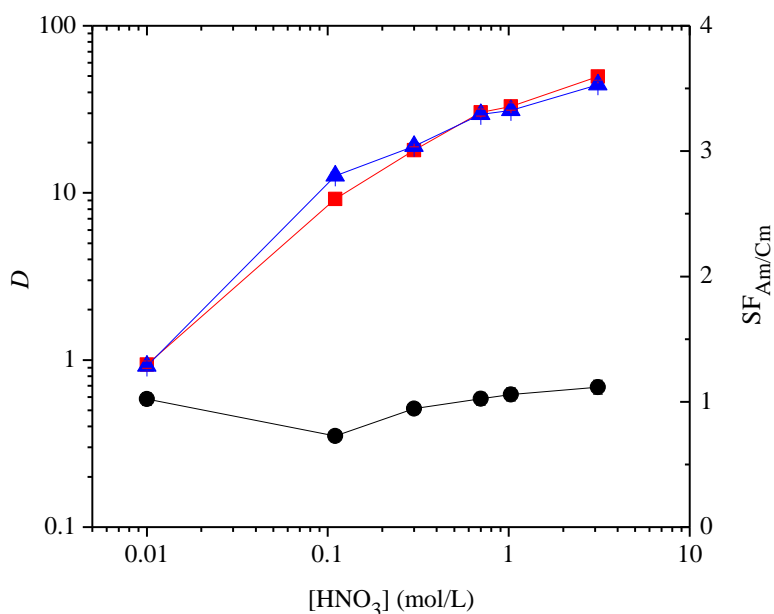

**Figure 10.** Extraction of Am(III) and Cm(III) by BTPPhen ligand **14** (0.01 M) into 1-octanol as a function of the initial nitric acid concentration of the aqueous phase ( $D$  = distribution ratio, SF = separation factor, ■ =  $D_{Am}$ , ▲ =  $D_{Cm}$ , ● =  $SF_{Am/Cm}$ , contact time: 60 min, temperature:  $22 \text{ }^{\circ}\text{C} \pm 1 \text{ }^{\circ}\text{C}$ ).

**Table 12.** Extraction of Am(III) and Eu(III) from 1.03 M nitric acid by 10 mM BTPPhen ligand **14** into 1-octanol as a function of contact time. Results are from gamma spectrometry ( $D$  = distribution ratio, SF = separation factor, temperature: 22 °C ± 1 °C).

| Contact time (min) | $D_{Am}$ | $D_{Eu}$ | SF <sub>Am/Eu</sub> |
|--------------------|----------|----------|---------------------|
| 5                  | 38.0     | 1.70     | 22.5                |
| 10                 | 34.2     | 1.63     | 21.0                |
| 30                 | 31.8     | 1.61     | 19.7                |
| 60                 | 33.1     | 1.58     | 21.0                |
| 120                | 37.4     | 1.55     | 24.1                |

**Table 13.** Extraction of Am(III) and Cm(III) from 1.03 M nitric acid by 10 mM BTPPhen ligand **14** into 1-octanol as a function of contact time. Results are from alpha spectrometry ( $D$  = distribution ratio, SF = separation factor, temperature: 22 °C ± 1 °C).

| Contact time (min) | $D_{Am}$ | $D_{Cm}$ | SF <sub>Am/Cm</sub> |
|--------------------|----------|----------|---------------------|
| 5                  | 33.2     | 30.5     | 1.1                 |
| 10                 | 32.0     | 29.1     | 1.1                 |
| 30                 | 33.0     | 32.6     | 1.0                 |
| 60                 | 38.0     | 33.7     | 1.1                 |
| 120                | 37.0     | 31.8     | 1.2                 |

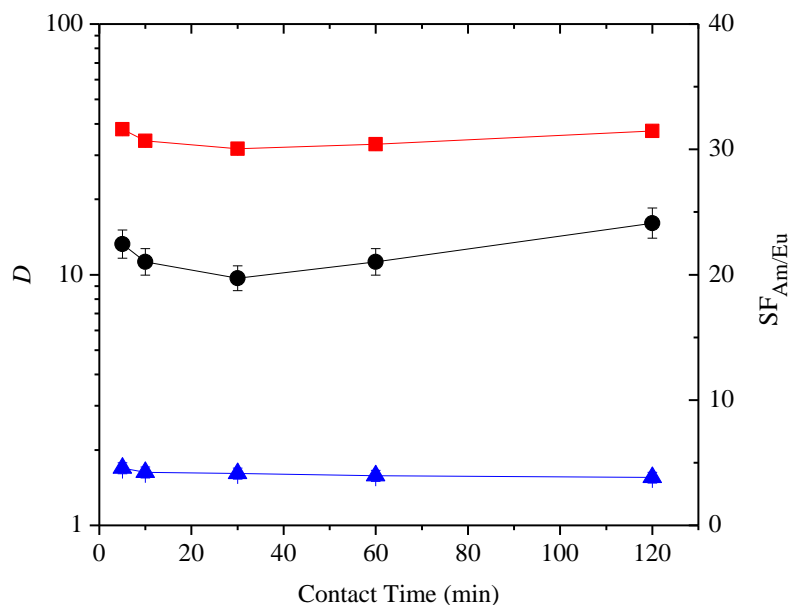

**Figure 11.** Extraction of Am(III) and Eu(III) from 1.03 M nitric acid by BTPPhen ligand **14** (0.01 M) into 1-octanol as a function of contact time ( $D$  = distribution ratio, SF = separation factor,  $\blacksquare$  =  $D_{Am}$ ,  $\blacktriangle$  =  $D_{Eu}$ ,  $\bullet$  =  $SF_{Am/Eu}$ , temperature:  $22\text{ }^{\circ}\text{C} \pm 1\text{ }^{\circ}\text{C}$ ).

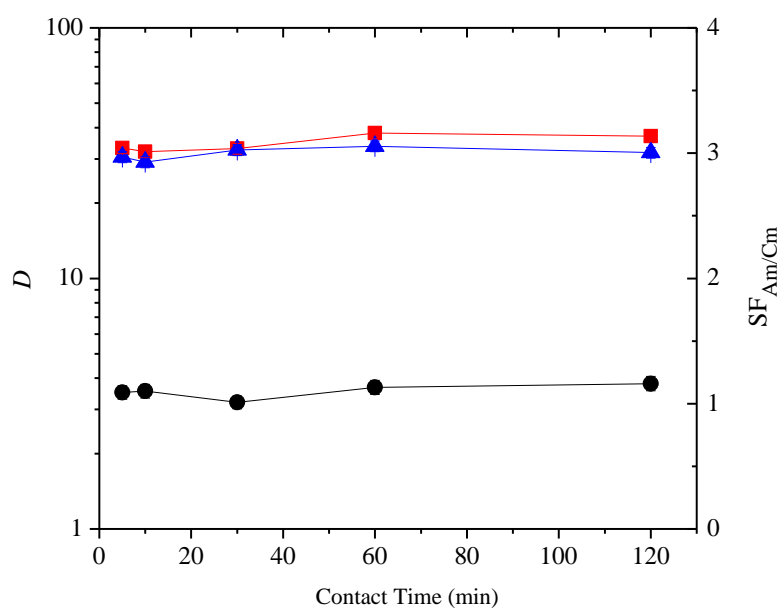

**Figure 12.** Extraction of Am(III) and Cm(III) from 1.03 M nitric acid by BTPPhen ligand **14** (0.01 M) into 1-octanol as a function of contact time ( $D$  = distribution ratio, SF = separation factor,  $\blacksquare$  =  $D_{Am}$ ,  $\blacktriangle$  =  $D_{Cm}$ ,  $\bullet$  =  $SF_{Am/Cm}$ , temperature:  $22\text{ }^{\circ}\text{C} \pm 1\text{ }^{\circ}\text{C}$ ).

**Table 14.** Extraction of Am(III) and Eu(III) from 0.3 M nitric acid by 10 mM BTPPhen ligand **14** into 1-octanol as a function of contact time. Results are from gamma spectrometry ( $D$  = distribution ratio, SF = separation factor, temperature: 22 °C ± 1 °C).

| Contact time (min) | $D_{Am}$ | $D_{Eu}$ | SF <sub>Am/Eu</sub> |
|--------------------|----------|----------|---------------------|
| 5                  | 24.0     | 2.89     | 8.3                 |
| 10                 | 25.1     | 3.04     | 8.3                 |
| 20                 | 26.6     | 2.98     | 8.9                 |
| 30                 | 24.6     | 3.01     | 8.2                 |
| 45                 | 25.8     | 3.05     | 8.5                 |
| 60                 | 25.4     | 3.05     | 8.3                 |

**Table 15.** Extraction of Am(III) and Cm(III) from 0.3 M nitric acid by 10 mM BTPPhen ligand **14** into 1-octanol as a function of contact time. Results are from alpha spectrometry ( $D$  = distribution ratio, SF = separation factor, temperature: 22 °C ± 1 °C).

| Contact time (min) | $D_{Am}$ | $D_{Cm}$ | SF <sub>Am/Cm</sub> |
|--------------------|----------|----------|---------------------|
| 5                  | 22.9     | 22.2     | 1.0                 |
| 10                 | 23.9     | 23.7     | 1.0                 |
| 20                 | 24.2     | 24.3     | 1.0                 |
| 30                 | 24.8     | 24.9     | 1.0                 |
| 45                 | 19.8     | 19.6     | 1.0                 |
| 60                 | 24.4     | 24.4     | 1.0                 |



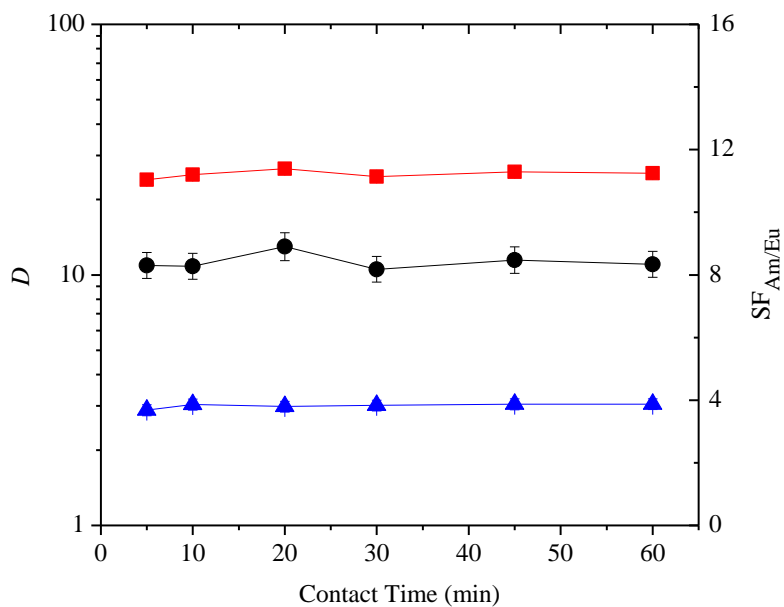

**Figure 13.** Extraction of Am(III) and Eu(III) from 0.3 M nitric acid by BTPhen ligand **14** (0.01 M) into 1-octanol as a function of contact time ( $D$  = distribution ratio, SF = separation factor,  $\blacksquare$  =  $D_{Am}$ ,  $\blacktriangle$  =  $D_{Eu}$ ,  $\bullet$  =  $SF_{Am/Eu}$ , temperature:  $22\text{ }^{\circ}\text{C} \pm 1\text{ }^{\circ}\text{C}$ ).

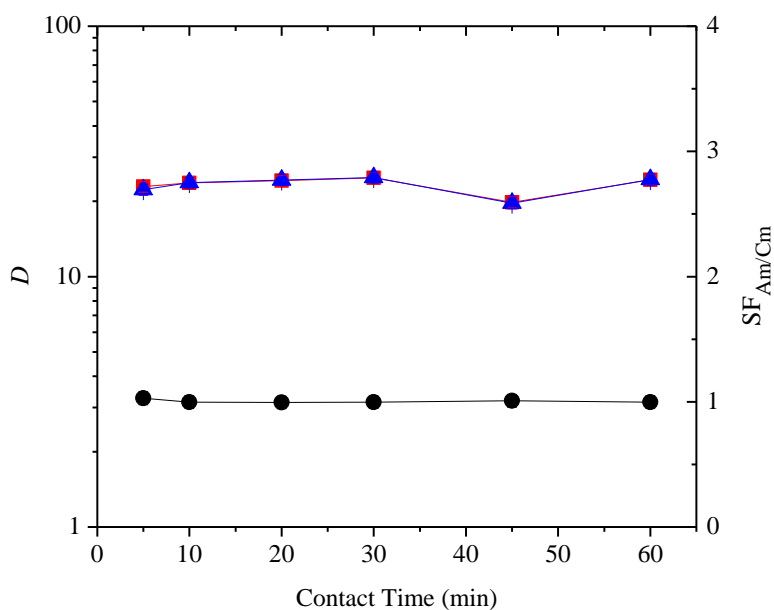

**Figure 14.** Extraction of Am(III) and Cm(III) from 0.3 M nitric acid by BTPhen ligand **14** (0.01 M) into 1-octanol as a function of contact time ( $D$  = distribution ratio, SF = separation factor,  $\blacksquare$  =  $D_{Am}$ ,  $\blacktriangle$  =  $D_{Cm}$ ,  $\bullet$  =  $SF_{Am/Cm}$ , temperature:  $22\text{ }^{\circ}\text{C} \pm 1\text{ }^{\circ}\text{C}$ ).

**Table 16.** Extraction of Y(III) and all the trivalent lanthanides (except Pm) by 10 mM BTPhen ligand **14** into 1-octanol as a function of the initial nitric acid concentration of the aqueous phase. Results are from ICP-MS ( $D$  = distribution ratio,  $SF$  = separation factor, contact time: 60 min, temperature:  $22\text{ }^{\circ}\text{C} \pm 1\text{ }^{\circ}\text{C}$ ).

| [HNO <sub>3</sub> ] (mol/L) |               | 0.01 | 0.11 | 0.30 | 0.70 | 1.03 | 3.11 |
|-----------------------------|---------------|------|------|------|------|------|------|
| Element                     | Atomic Number | $D$  | $D$  | $D$  | $D$  | $D$  | $D$  |
| Y                           | 39            | 0.01 | 0.05 | 0.11 | 0.10 | 0.09 | 0.06 |
| La                          | 57            | 0.02 | 0.22 | 0.42 | 0.33 | 0.23 | 0.07 |
| Ce                          | 58            | 0.08 | 1.11 | 2.21 | 1.74 | 1.22 | 0.34 |
| Pr                          | 59            | 0.15 | 2.02 | 4.02 | 3.17 | 2.3  | 0.67 |
| Nd                          | 60            | 0.19 | 2.51 | 4.96 | 3.99 | 2.94 | 0.91 |
| Sm                          | 62            | 0.20 | 2.51 | 4.76 | 3.77 | 2.68 | 0.99 |
| Eu                          | 63            | 0.17 | 2.0  | 3.77 | 2.99 | 2.19 | 0.88 |
| Gd                          | 64            | 0.10 | 1.14 | 2.16 | 1.74 | 1.31 | 0.57 |
| Tb                          | 65            | 0.13 | 1.45 | 2.96 | 2.55 | 1.97 | 0.96 |
| Dy                          | 66            | 0.14 | 1.57 | 3.26 | 2.94 | 2.38 | 1.27 |
| Ho                          | 67            | 0.13 | 1.61 | 3.43 | 3.23 | 2.62 | 1.53 |
| Er                          | 68            | 0.14 | 1.65 | 3.51 | 3.27 | 2.70 | 1.46 |
| Tm                          | 69            | 0.12 | 1.15 | 2.15 | 1.81 | 1.45 | 0.71 |
| Yb                          | 70            | 0.12 | 0.65 | 1.04 | 0.83 | 0.65 | 0.33 |
| Lu                          | 71            | 0.12 | 0.36 | 0.49 | 0.38 | 0.31 | 0.16 |

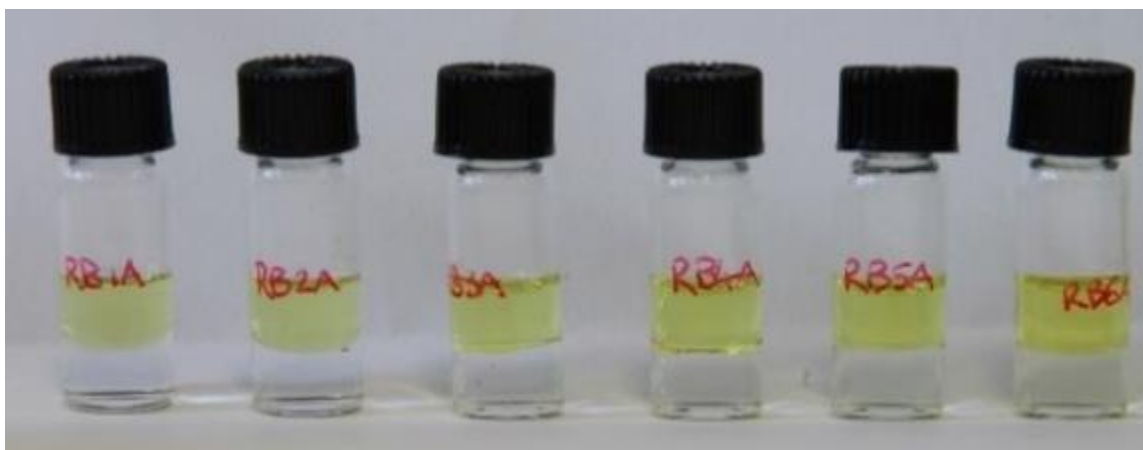

**Figure 15.** Photograph of the sample tubes from the extraction of Am(III), Cm(III) and Eu(III) by 10 mM BTPPhen ligand **14** into 1-octanol as a function of the initial nitric acid concentration of the aqueous phase, with increasing  $[\text{HNO}_3]$  going from left to right.

## 6.4 Extraction Studies for CA-BTBP Ligand 17

**Table 17.** Extraction of Am(III) and Eu(III) by 10 mM CA-BTBP ligand **17** into 1-octanol as a function of the initial nitric acid concentration of the aqueous phase. Results are from gamma spectrometry ( $D$  = distribution ratio, SF = separation factor, contact time: 60 min, temperature:  $22\text{ }^{\circ}\text{C} \pm 1\text{ }^{\circ}\text{C}$ ).

| [HNO <sub>3</sub> ] initial (mol/L) | $D_{\text{Am}}$ | $D_{\text{Eu}}$ | SF <sub>Am/Eu</sub> |
|-------------------------------------|-----------------|-----------------|---------------------|
| 0.001                               | 0.02            | 0.003           | 5.77                |
| 0.013                               | 0.17            | 0.003           | 49.0                |
| 0.296                               | 0.84            | 0.007           | 128.5               |
| 0.796                               | 3.06            | 0.020           | 153.4               |
| 1.031                               | 7.71            | 0.058           | 133.4               |
| 3.000                               | 0.11            | 0.005           | 22.0                |

**Table 18.** Extraction of Am(III) and Cm(III) by 10 mM CA-BTBP ligand **17** into 1-octanol as a function of the initial nitric acid concentration of the aqueous phase. Results are from alpha spectrometry ( $D$  = distribution ratio, SF = separation factor, contact time: 60 min, temperature:  $22\text{ }^{\circ}\text{C} \pm 1\text{ }^{\circ}\text{C}$ ).

| [HNO <sub>3</sub> ] initial (mol/L) | $D_{\text{Am}}$ | $D_{\text{Cm}}$ | SF <sub>Am/Cm</sub> |
|-------------------------------------|-----------------|-----------------|---------------------|
| 0.001                               | 0.02            | 0.01            | 2.1                 |
| 0.013                               | 0.14            | 0.06            | 2.4                 |
| 0.296                               | 0.72            | 0.31            | 2.3                 |
| 0.796                               | 2.51            | 1.10            | 2.3                 |
| 1.031                               | 3.75            | 1.75            | 2.2                 |
| 3.000                               | 0.14            | 0.07            | 2.1                 |

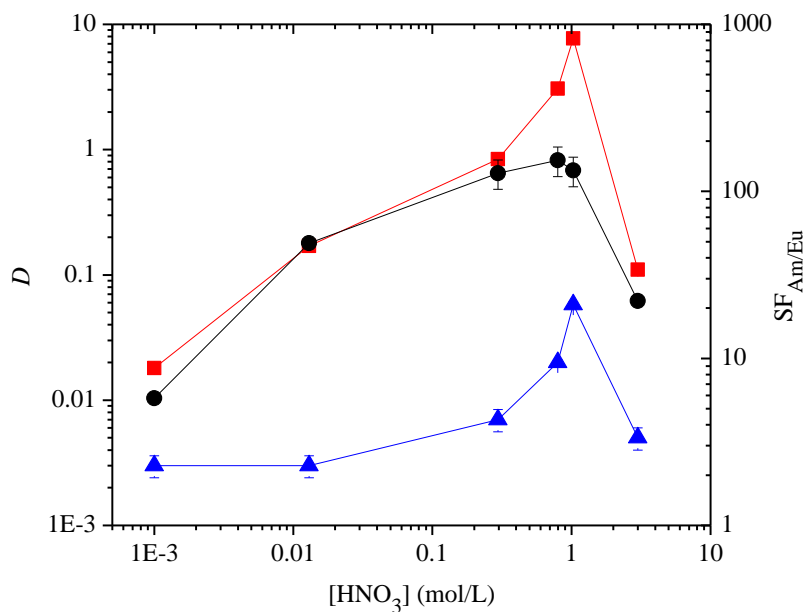

**Figure 16.** Extraction of Am(III) and Eu(III) by CA-BTBP **17** (0.01 M) into 1-octanol as a function of the initial nitric acid concentration of the aqueous phase ( $D$  = distribution ratio, SF = separation factor,  $\blacksquare$  =  $D_{Am}$ ,  $\blacktriangle$  =  $D_{Eu}$ ,  $\bullet$  =  $SF_{Am/Eu}$ , contact time: 60 min, temperature: 22 °C  $\pm$  1 °C).

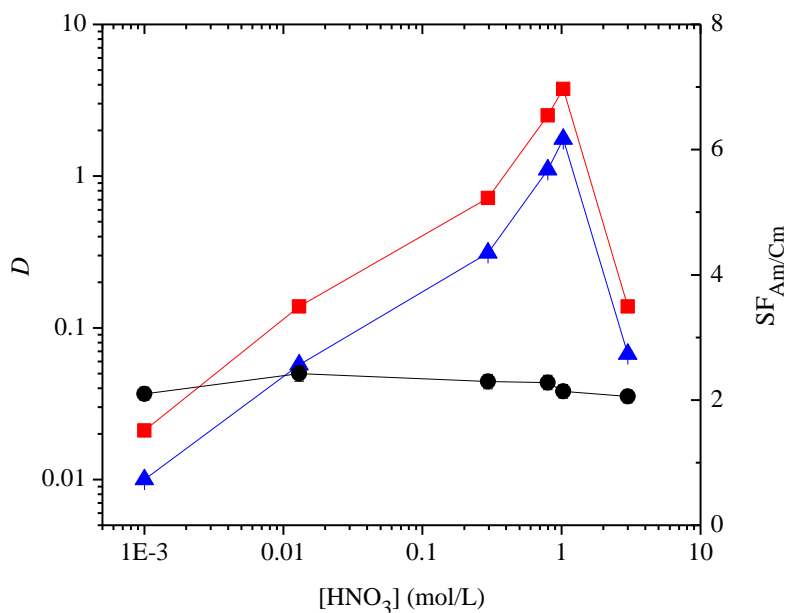

**Figure 17.** Extraction of Am(III) and Cm(III) by CA-BTBP **17** (0.01 M) into 1-octanol as a function of the initial nitric acid concentration of the aqueous phase ( $D$  = distribution ratio, SF = separation factor,  $\blacksquare$  =  $D_{Am}$ ,  $\blacktriangle$  =  $D_{Cm}$ ,  $\bullet$  =  $SF_{Am/Cm}$ , contact time: 60 min, temperature: 22 °C  $\pm$  1 °C).

**Table 19.** Extraction of Y(III) and all the trivalent lanthanides (except Pm) by 10 mM CA-BTBP ligand **17** into 1-octanol as a function of the initial nitric acid concentration of the aqueous phase. Results are from ICP-MS ( $D$  = distribution ratio, SF = separation factor, contact time: 60 min, temperature: 22 °C  $\pm$  1 °C).

| <b>[HNO<sub>3</sub>] (mol/L)</b> |                      | 0.01         | 0.11         | 0.30         | 0.70  | 1.03  | 3.11  |
|----------------------------------|----------------------|--------------|--------------|--------------|-------|-------|-------|
| <b>Element</b>                   | <b>Atomic Number</b> | $D$          | $D$          | $D$          | $D$   | $D$   | $D$   |
| Y                                | 39                   | $\leq 0.001$ | $\leq 0.001$ | $\leq 0.001$ | 0.002 | 0.001 | 0.002 |
| La                               | 57                   | $\leq 0.001$ | $\leq 0.001$ | $\leq 0.001$ | 0.001 | 0.001 | 0.002 |
| Ce                               | 58                   | $\leq 0.001$ | 0.001        | 0.001        | 0.004 | 0.002 | 0.002 |
| Pr                               | 59                   | $\leq 0.001$ | $\leq 0.001$ | 0.002        | 0.008 | 0.004 | 0.002 |
| Nd                               | 60                   | $\leq 0.001$ | 0.001        | 0.003        | 0.012 | 0.006 | 0.003 |
| Sm                               | 62                   | $\leq 0.001$ | 0.001        | 0.004        | 0.018 | 0.008 | 0.003 |
| Eu                               | 63                   | $\leq 0.001$ | 0.001        | 0.004        | 0.017 | 0.008 | 0.003 |
| Gd                               | 64                   | $\leq 0.001$ | $\leq 0.001$ | 0.003        | 0.012 | 0.006 | 0.003 |
| Tb                               | 65                   | $\leq 0.001$ | 0.001        | 0.004        | 0.021 | 0.009 | 0.004 |
| Dy                               | 66                   | $\leq 0.001$ | 0.001        | 0.006        | 0.029 | 0.014 | 0.005 |
| Ho                               | 67                   | $\leq 0.001$ | 0.001        | 0.007        | 0.036 | 0.016 | 0.006 |
| Er                               | 68                   | $\leq 0.001$ | 0.001        | 0.008        | 0.043 | 0.022 | 0.008 |
| Tm                               | 69                   | $\leq 0.001$ | 0.001        | 0.008        | 0.043 | 0.020 | 0.009 |
| Yb                               | 70                   | 0.001        | 0.001        | 0.007        | 0.040 | 0.020 | 0.009 |
| Lu                               | 71                   | 0.001        | 0.001        | 0.007        | 0.037 | 0.018 | 0.010 |

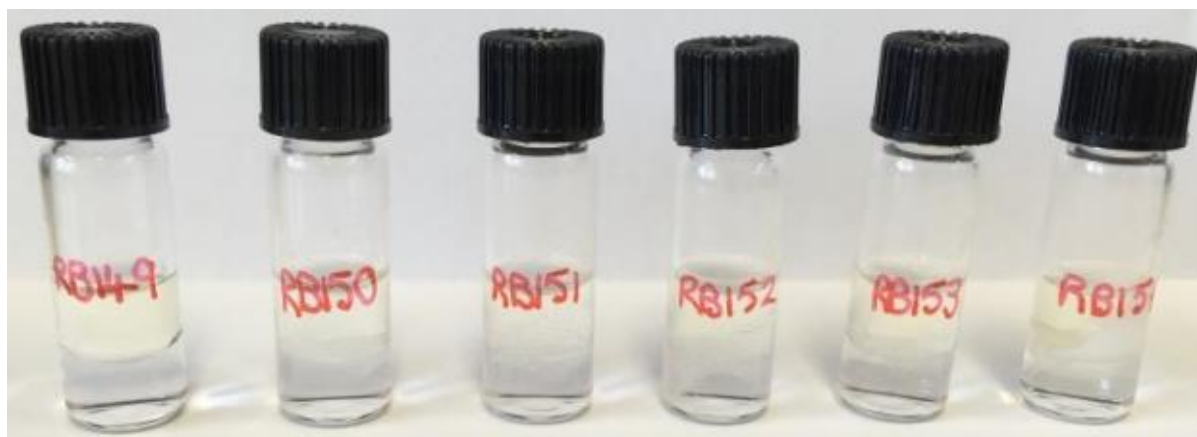

**Figure 18.** Photograph of the sample tubes from the extraction of Am(III), Cm(III) and Eu(III) by 10 mM CA-BTBP ligand **17** into 1-octanol as a function of the initial nitric acid concentration of the aqueous phase, with increasing  $[\text{HNO}_3]$  going from left to right.

## 6.5 Extraction Studies for CA-BTPhen Ligand 18

**Table 20.** Extraction of Am(III) and Eu(III) by 10 mM CA-BTPhen ligand **18** into 1-octanol as a function of the initial nitric acid concentration of the aqueous phase. Results are from gamma spectrometry ( $D$  = distribution ratio, SF = separation factor, contact time: 60 min, temperature:  $22\text{ }^{\circ}\text{C} \pm 1\text{ }^{\circ}\text{C}$ ).

| [HNO <sub>3</sub> ] initial (mol/L) | $D_{\text{Am}}$ | $D_{\text{Eu}}$ | SF <sub>Am/Eu</sub> |
|-------------------------------------|-----------------|-----------------|---------------------|
| 0.001                               | 2.19            | 0.02            | 129.7               |
| 0.013                               | 15.0            | 0.07            | 223.3               |
| 0.296                               | 40.4            | 0.15            | 264.6               |
| 0.796                               | 47.0            | 0.18            | 264.4               |
| 1.031                               | 25.1            | 0.24            | 105.5               |
| 3.000                               | 7.91            | 0.04            | 211.7               |

**Table 21.** Extraction of Am(III) and Cm(III) by 10 mM CA-BTPhen ligand **18** into 1-octanol as a function of the initial nitric acid concentration of the aqueous phase. Results are from alpha spectrometry ( $D$  = distribution ratio, SF = separation factor, contact time: 60 min, temperature:  $22\text{ }^{\circ}\text{C} \pm 1\text{ }^{\circ}\text{C}$ ).

| [HNO <sub>3</sub> ] initial (mol/L) | $D_{\text{Am}}$ | $D_{\text{Cm}}$ | SF <sub>Am/Cm</sub> |
|-------------------------------------|-----------------|-----------------|---------------------|
| 0.001                               | 1.99            | 0.83            | 2.4                 |
| 0.013                               | 9.70            | 4.92            | 2.0                 |
| 0.296                               | 10.8            | 7.70            | 1.4                 |
| 0.796                               | 23.7            | 12.2            | 1.9                 |
| 1.031                               | 22.3            | 12.1            | 1.8                 |
| 3.000                               | 4.86            | 2.66            | 1.8                 |



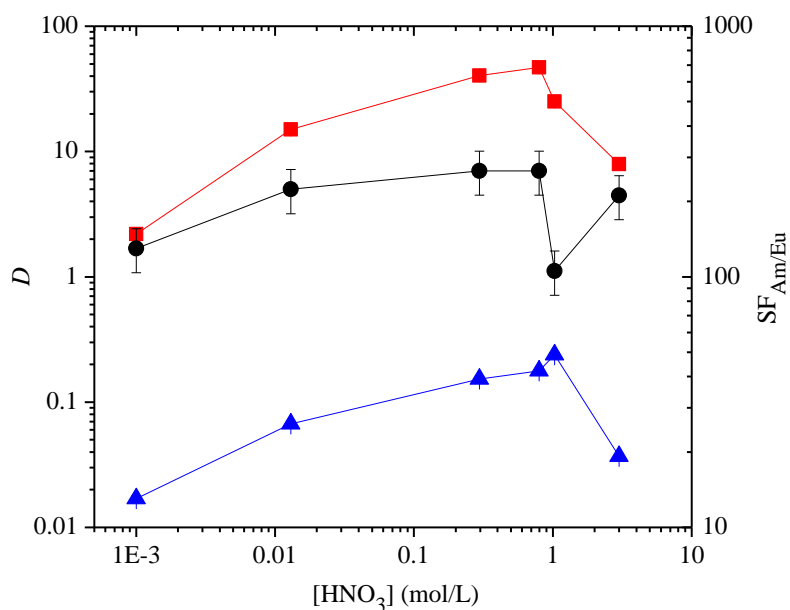

**Figure 19.** Extraction of Am(III) and Eu(III) by CA-BTPhen **18** (0.01 M) into 1-octanol as a function of the initial nitric acid concentration of the aqueous phase ( $D$  = distribution ratio, SF = separation factor,  $\blacksquare$  =  $D_{Am}$ ,  $\blacktriangle$  =  $D_{Eu}$ ,  $\bullet$  =  $SF_{Am/Eu}$ , contact time: 60 min, temperature:  $22\text{ }^{\circ}\text{C} \pm 1\text{ }^{\circ}\text{C}$ ).

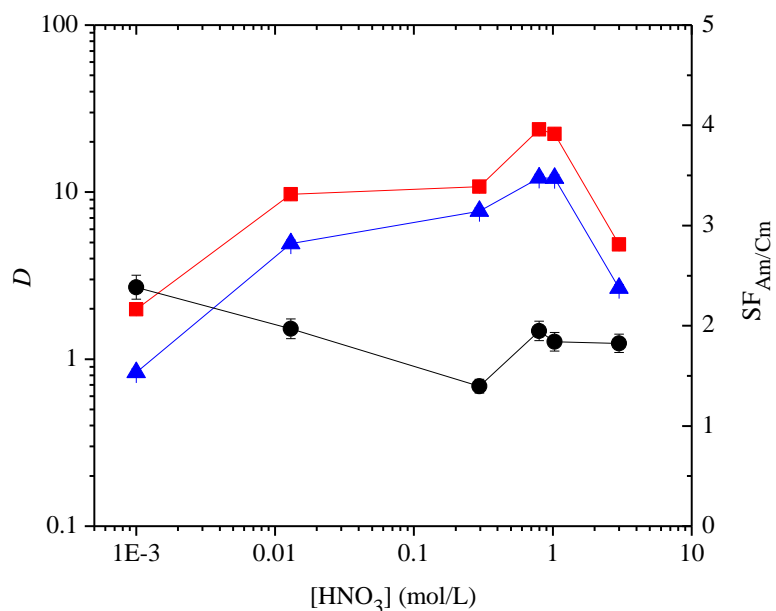

**Figure 20.** Extraction of Am(III) and Cm(III) by CA-BTPhen **18** (0.01 M) into 1-octanol as a function of the initial nitric acid concentration of the aqueous phase ( $D$  = distribution ratio, SF = separation factor,  $\blacksquare$  =  $D_{Am}$ ,  $\blacktriangle$  =  $D_{Cm}$ ,  $\bullet$  =  $SF_{Am/Cm}$ , contact time: 60 min, temperature:  $22\text{ }^{\circ}\text{C} \pm 1\text{ }^{\circ}\text{C}$ ).

**Table 22.** Extraction of Y(III) and all the trivalent lanthanides (except Pm) by 10 mM CA-BTPhen ligand **18** into 1-octanol as a function of the initial nitric acid concentration of the aqueous phase. Results are from ICP-MS ( $D$  = distribution ratio,  $SF$  = separation factor, contact time: 60 min, temperature: 22 °C  $\pm$  1 °C).

| [HNO <sub>3</sub> ] (mol/L) |               | 0.01  | 0.11  | 0.30  | 0.70  | 1.03  | 3.11  |
|-----------------------------|---------------|-------|-------|-------|-------|-------|-------|
| Element                     | Atomic Number | $D$   | $D$   | $D$   | $D$   | $D$   | $D$   |
| Y                           | 39            | 0.002 | 0.002 | 0.004 | 0.006 | 0.007 | 0.005 |
| La                          | 57            | 0.011 | 0.011 | 0.019 | 0.019 | 0.017 | 0.004 |
| Ce                          | 58            | 0.031 | 0.043 | 0.090 | 0.092 | 0.074 | 0.011 |
| Pr                          | 59            | 0.038 | 0.072 | 0.171 | 0.173 | 0.141 | 0.020 |
| Nd                          | 60            | 0.034 | 0.087 | 0.231 | 0.237 | 0.187 | 0.029 |
| Sm                          | 62            | 0.024 | 0.085 | 0.232 | 0.244 | 0.205 | 0.041 |
| Eu                          | 63            | 0.017 | 0.063 | 0.179 | 0.197 | 0.167 | 0.041 |
| Gd                          | 64            | 0.009 | 0.032 | 0.094 | 0.109 | 0.095 | 0.026 |
| Tb                          | 65            | 0.011 | 0.039 | 0.117 | 0.147 | 0.129 | 0.044 |
| Dy                          | 66            | 0.012 | 0.038 | 0.119 | 0.152 | 0.136 | 0.053 |
| Ho                          | 67            | 0.012 | 0.037 | 0.115 | 0.156 | 0.142 | 0.060 |
| Er                          | 68            | 0.014 | 0.036 | 0.115 | 0.157 | 0.144 | 0.070 |
| Tm                          | 69            | 0.014 | 0.029 | 0.093 | 0.129 | 0.120 | 0.067 |
| Yb                          | 70            | 0.016 | 0.024 | 0.074 | 0.105 | 0.097 | 0.062 |
| Lu                          | 71            | 0.018 | 0.019 | 0.059 | 0.081 | 0.077 | 0.053 |

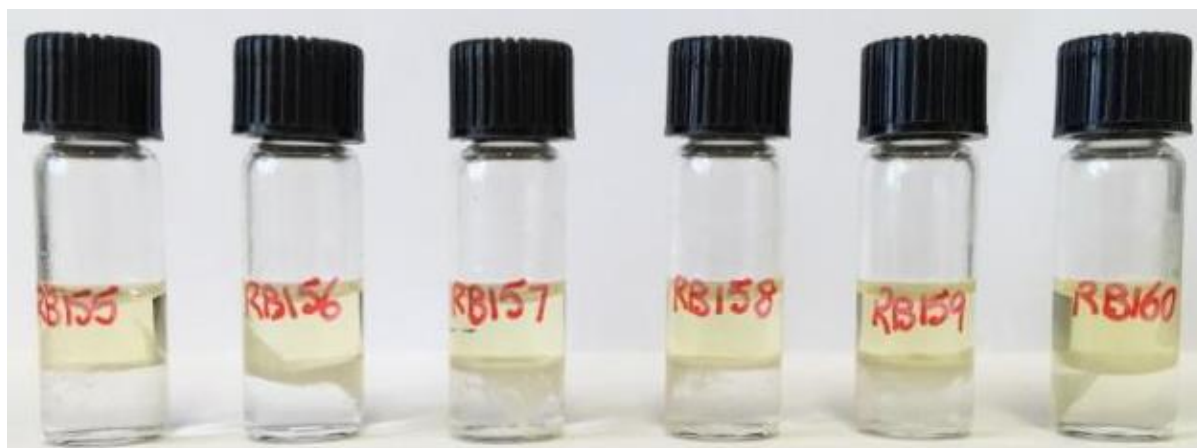

**Figure 21.** Photograph of the sample tubes from the extraction of Am(III), Cm(III) and Eu(III) by 10 mM CA-BTPhen ligand **18** into 1-octanol as a function of the initial nitric acid concentration of the aqueous phase, with increasing  $[\text{HNO}_3]$  going from left to right.

## 7: NMR Titrations with Metal Salts

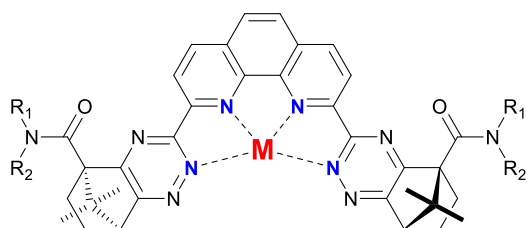

**Species A:**  
(symmetrical tetradentate coordination mode)

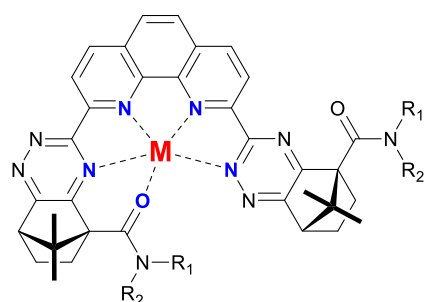

**Species B:**  
(unsymmetrical pentadentate coordination mode)

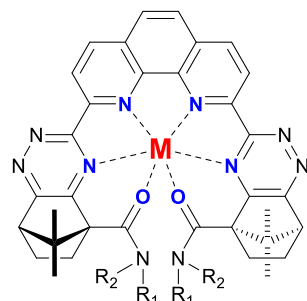

**Species C:**  
(symmetrical hexadentate coordination mode)

**Figure 22.** The three possible coordination modes of BTPhen ligands **12–14** with lanthanide ions **M** in their 1:1 metal:ligand complexes (species A: symmetrical tetradentate coordination mode, species B: unsymmetrical pentadentate coordination mode, species C: symmetrical hexadentate coordination mode). These species are labelled as follows in the species distribution diagrams; species A = ●, species B = ▼, species C = ◀. Species B can be distinguished from species A and C by  $^1\text{H}$  NMR spectroscopy.

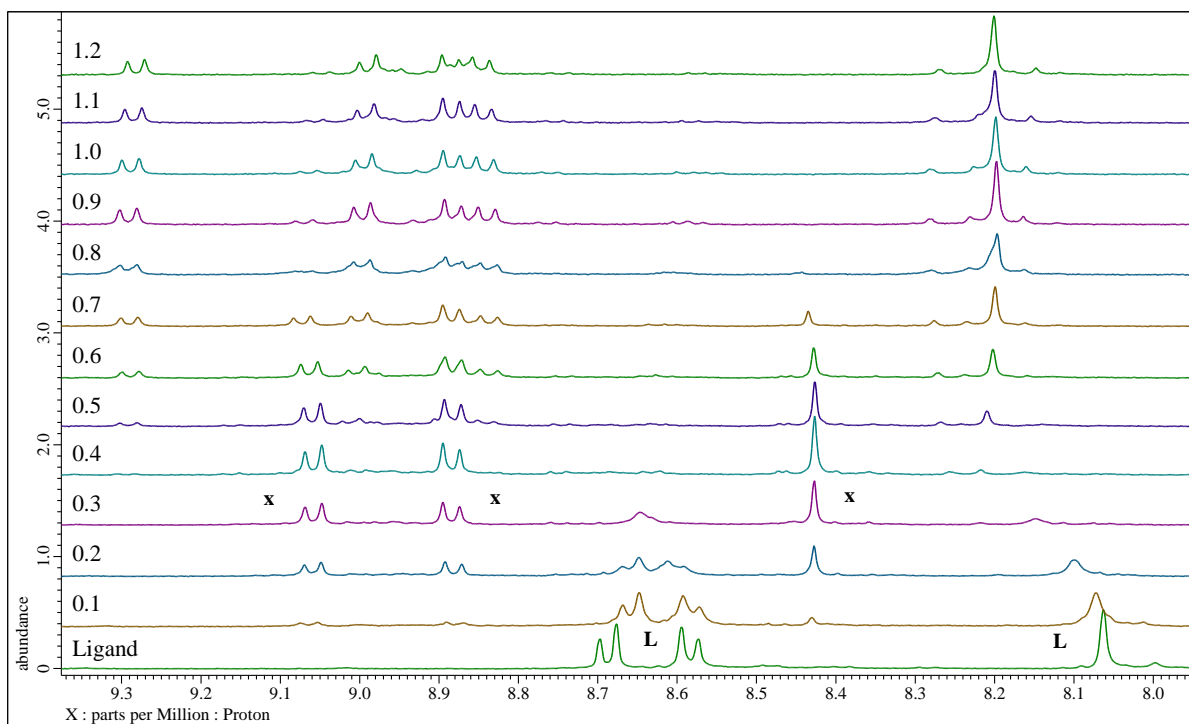

**Figure 23.** Aromatic region of the stack plot for the  $^1\text{H}$  NMR titration of BTPhen ligand **12** with  $\text{La}(\text{NO}_3)_3$  in  $\text{CD}_3\text{CN}$ . Bottom spectrum = free ligand. Each preceding spectrum corresponds to the addition of 0.1 equivalents of metal salt solution (L = free ligand, x = 1:2 complex  $[\text{La}(\mathbf{12})_2(\text{NO}_3)]^{2+}$ ).

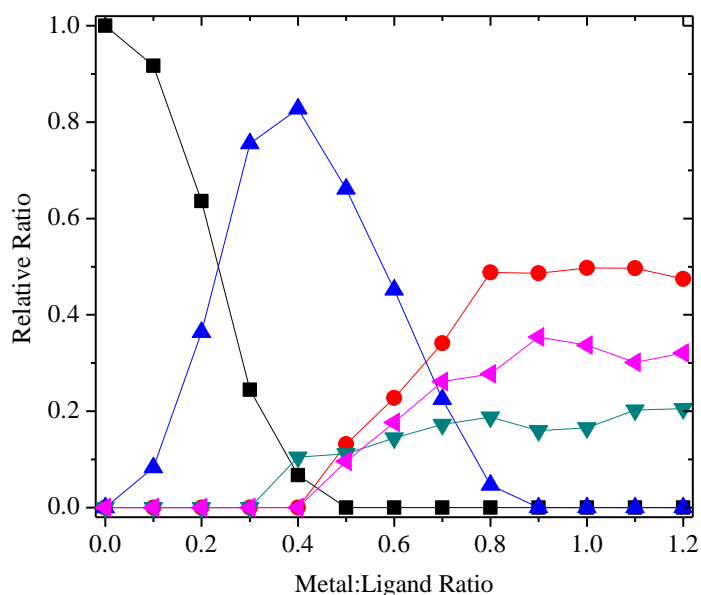

**Figure 24.** Species distribution for the  $^1\text{H}$  NMR titration of BTPhen **12** with  $\text{La}(\text{NO}_3)_3$  in  $\text{CD}_3\text{CN}$  (■ = free ligand, ▲ = 1:2 complex, ● = species A, ▼ = species B, ◄ = species C).

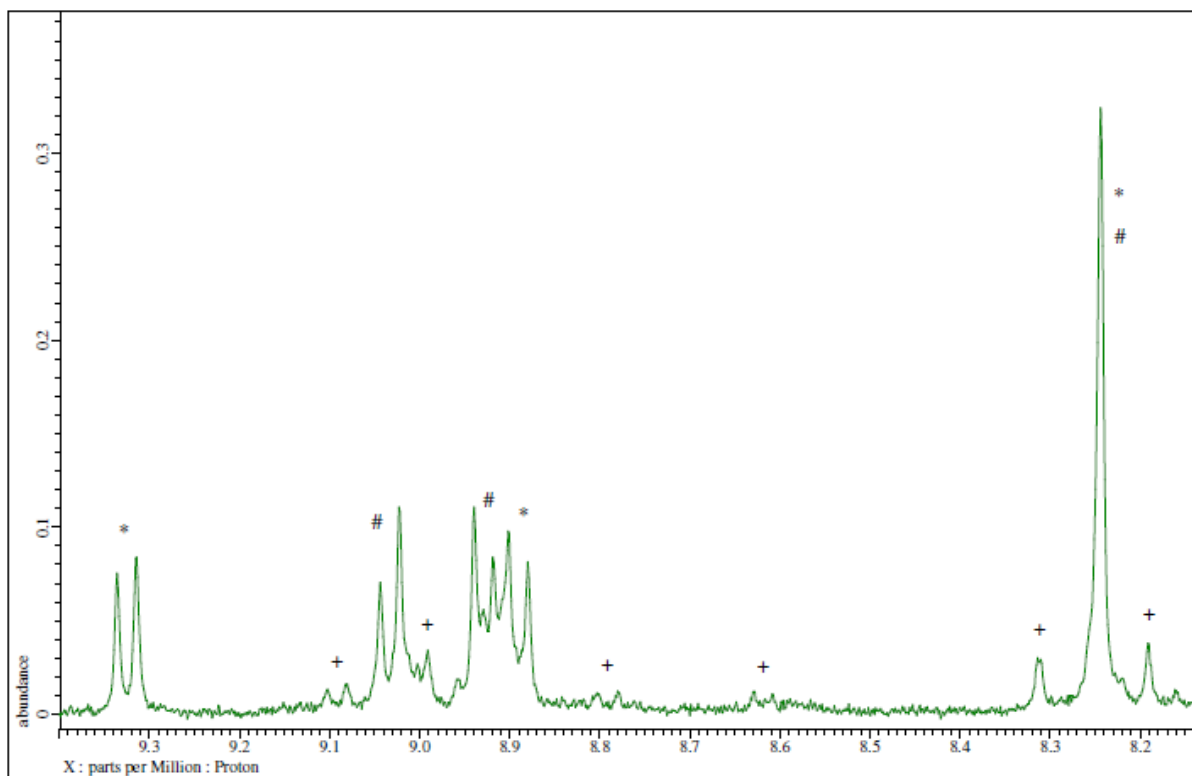

**Figure 25.** Enlargement of the aromatic region of the  $^1\text{H}$  NMR spectrum of a mixture of BTPPhen ligand **12** with  $\text{La}(\text{NO}_3)_3$  (1.2 equivalents) in  $\text{CD}_3\text{CN}$ . Assignments: \* = species A (symmetrical 1:1 complex with tetradentate coordination of ligand), + = species B (unsymmetrical 1:1 complex with pentadentate coordination of ligand), # = species C (symmetrical 1:1 complex with hexadentate coordination of ligand).

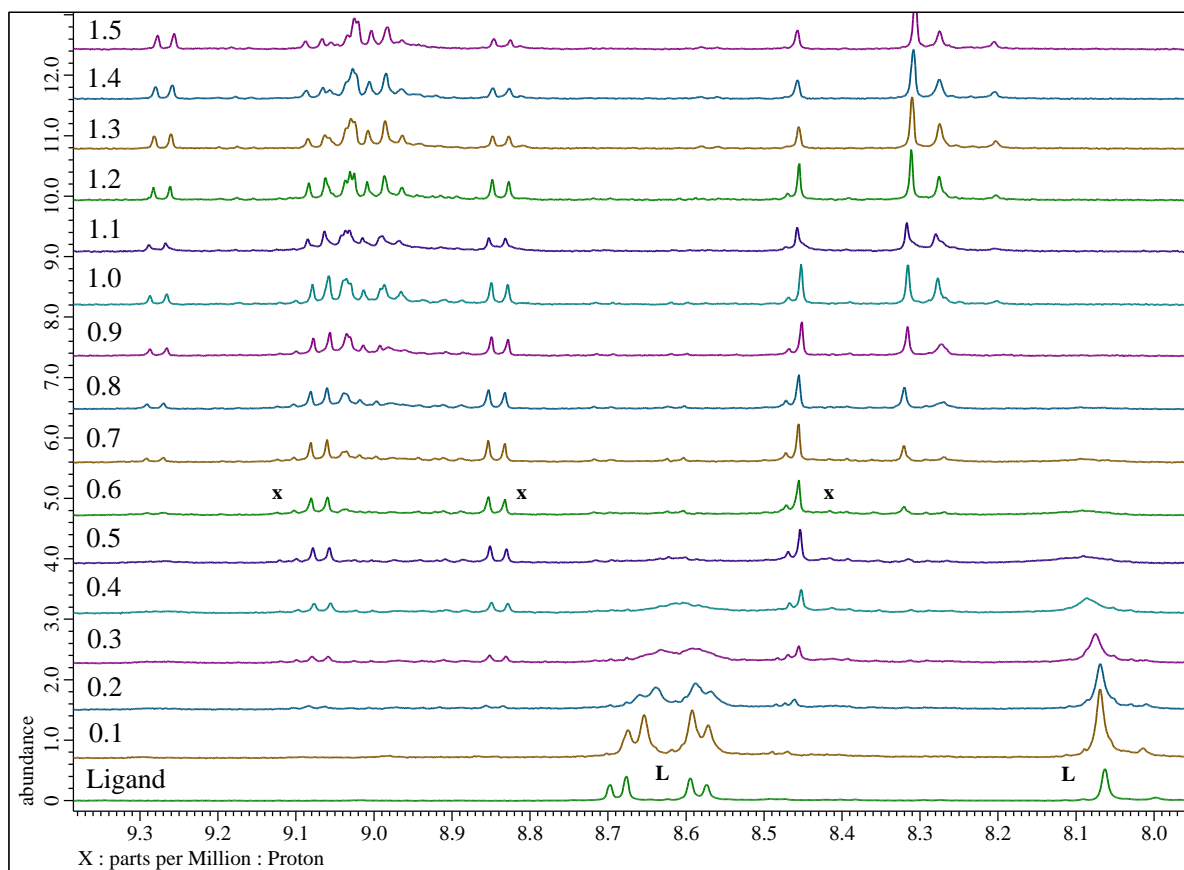

**Figure 26.** Aromatic region of the stack plot for the  $^1\text{H}$  NMR titration of BTPhen ligand **12** with  $\text{Lu}(\text{NO}_3)_3$  in  $\text{CD}_3\text{CN}$ . Bottom spectrum = free ligand. Each preceding spectrum corresponds to the addition of 0.1 equivalents of metal salt solution (L = free ligand, x = 1:2 complex  $[\text{Lu}(\mathbf{12})_2(\text{NO}_3)]^{2+}$ ).

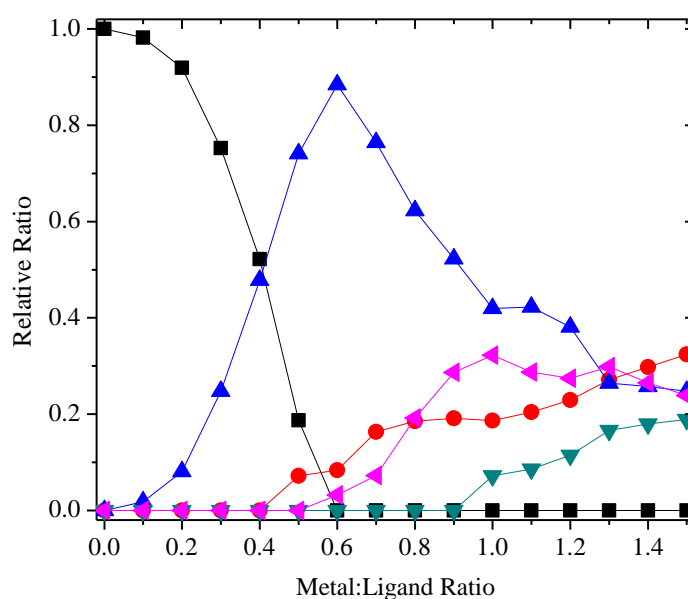

**Figure 27.** Species distribution for the  $^1\text{H}$  NMR titration of BTPhen **12** with  $\text{Lu}(\text{NO}_3)_3$  in  $\text{CD}_3\text{CN}$  (■ = free ligand, ▲ = 1:2 complex, ● = species A, ▼ = species B, ◀ = species C).

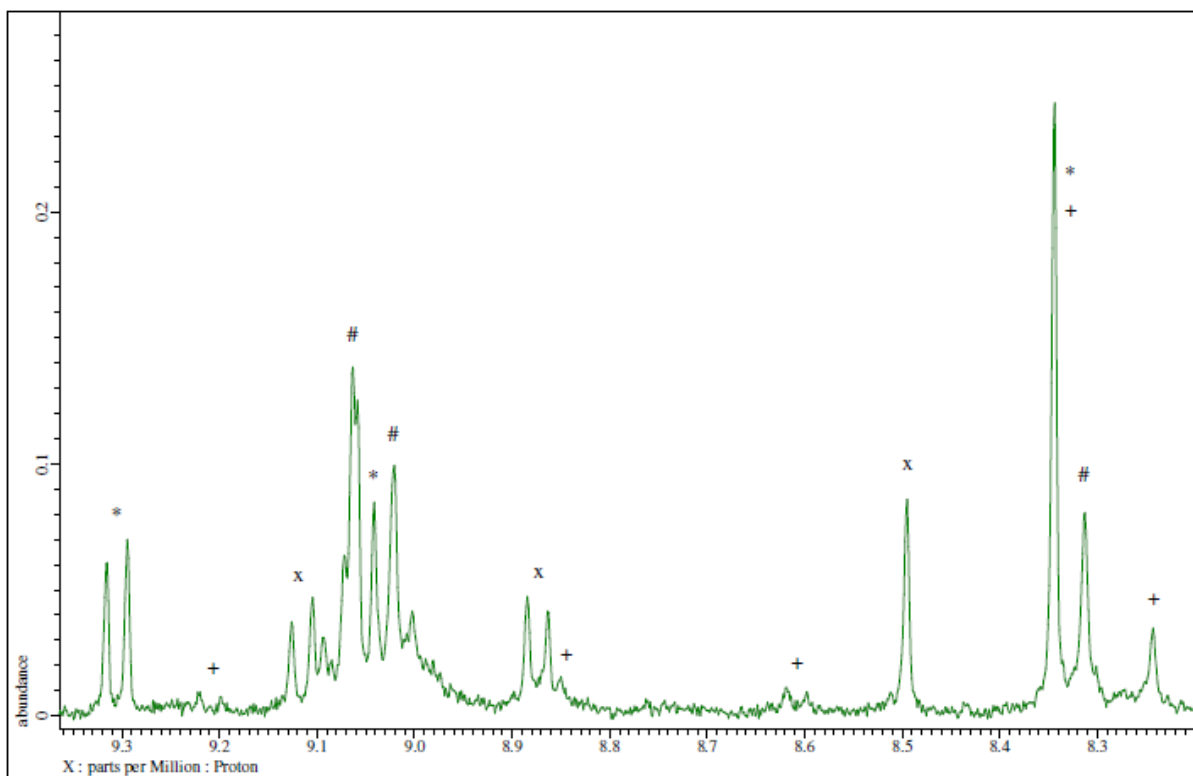

**Figure 28.** Enlargement of the aromatic region of the  $^1\text{H}$  NMR spectrum of a mixture of BTPPhen ligand **12** with  $\text{Lu}(\text{NO}_3)_3$  (1.5 equivalents) in  $\text{CD}_3\text{CN}$ . Assignments: x = 1:2 complex, \* = species A (symmetrical 1:1 complex with tetradentate coordination of ligand), + = species B (unsymmetrical 1:1 complex with pentadentate coordination of ligand), # = species C (symmetrical 1:1 complex with hexadentate coordination of ligand).



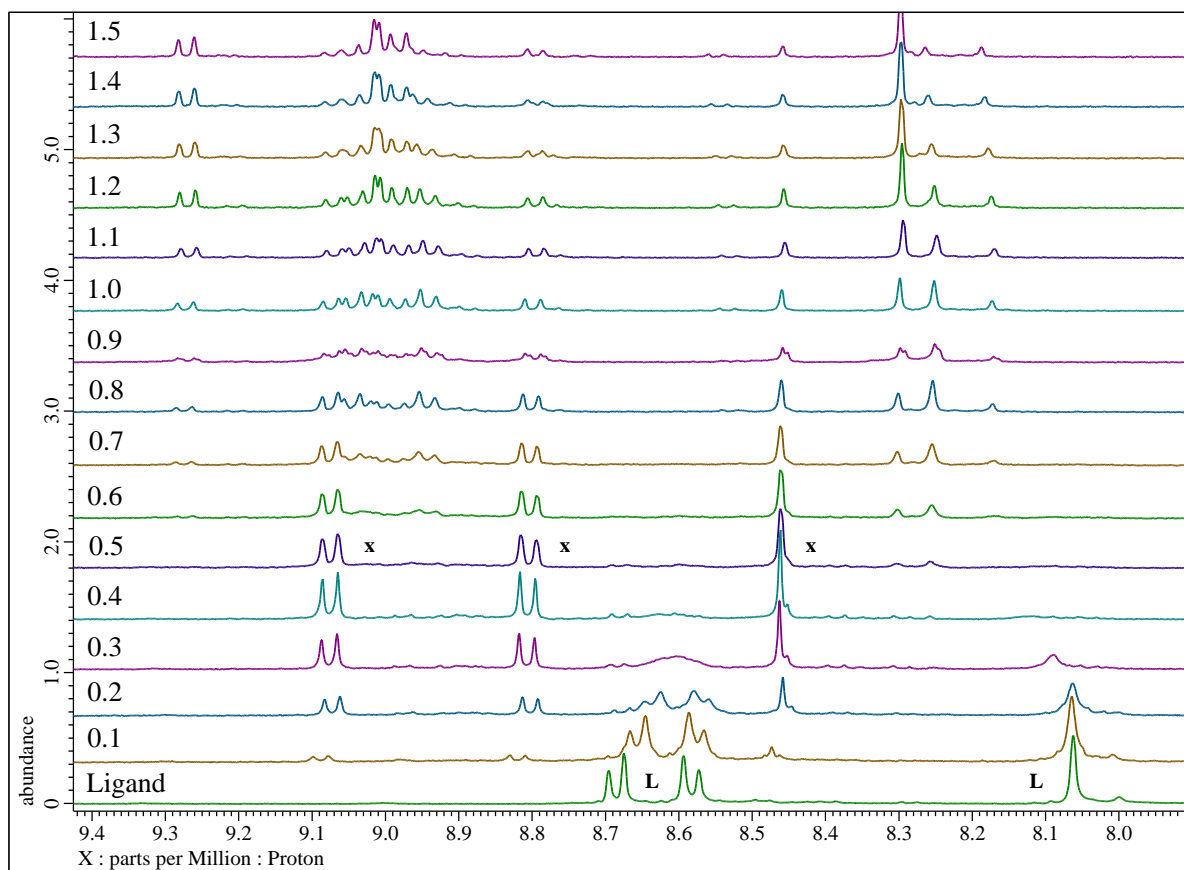

**Figure 29.** Aromatic region of the stack plot for the  $^1\text{H}$  NMR titration of BTPhen ligand **12** with  $\text{Y}(\text{NO}_3)_3$  in  $\text{CD}_3\text{CN}$ . Bottom spectrum = free ligand. Each preceding spectrum corresponds to the addition of 0.1 equivalents of metal salt solution (L = free ligand, x = 1:2 complex  $[\text{Y}(\mathbf{12})_2(\text{NO}_3)]^{2+}$ ).

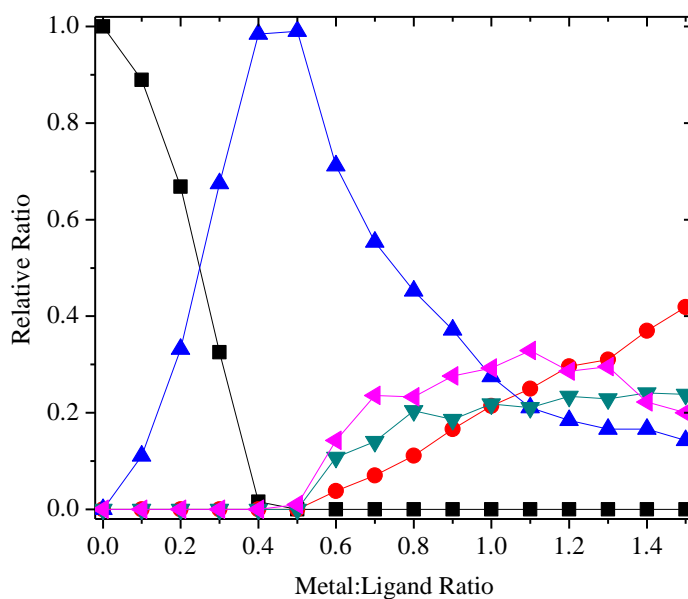

**Figure 30.** Species distribution for the  $^1\text{H}$  NMR titration of BTPhen **12** with  $\text{Y}(\text{NO}_3)_3$  in  $\text{CD}_3\text{CN}$  (■ = free ligand, ▲ = 1:2 complex, ● = species A, ▼ = species B, ◄ = species C).

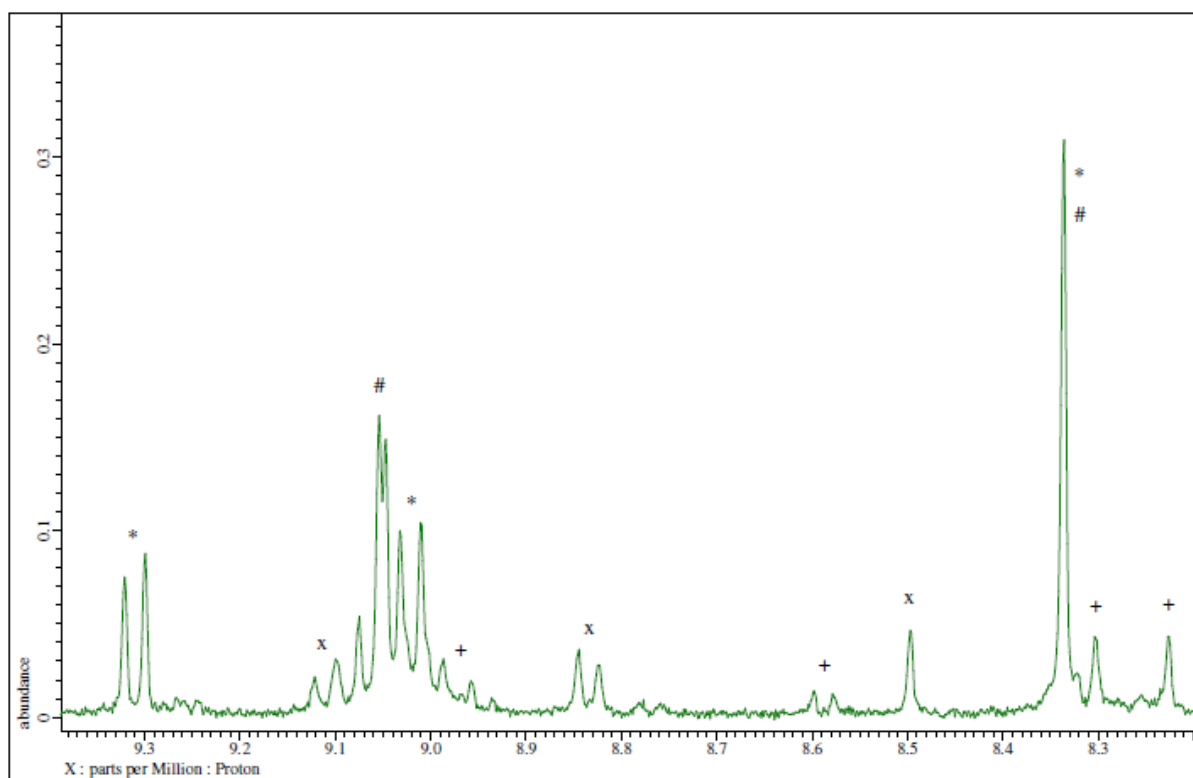

**Figure 31.** Enlargement of the aromatic region of the  $^1\text{H}$  NMR spectrum of a mixture of BTPhen ligand **12** with  $\text{Y}(\text{NO}_3)_3$  (1.5 equivalents) in  $\text{CD}_3\text{CN}$ . Assignments: x = 1:2 complex, \* = species A (symmetrical 1:1 complex with tetradentate coordination of ligand), + = species B (unsymmetrical 1:1 complex with pentadentate coordination of ligand), # = species C (symmetrical 1:1 complex with hexadentate coordination of ligand).

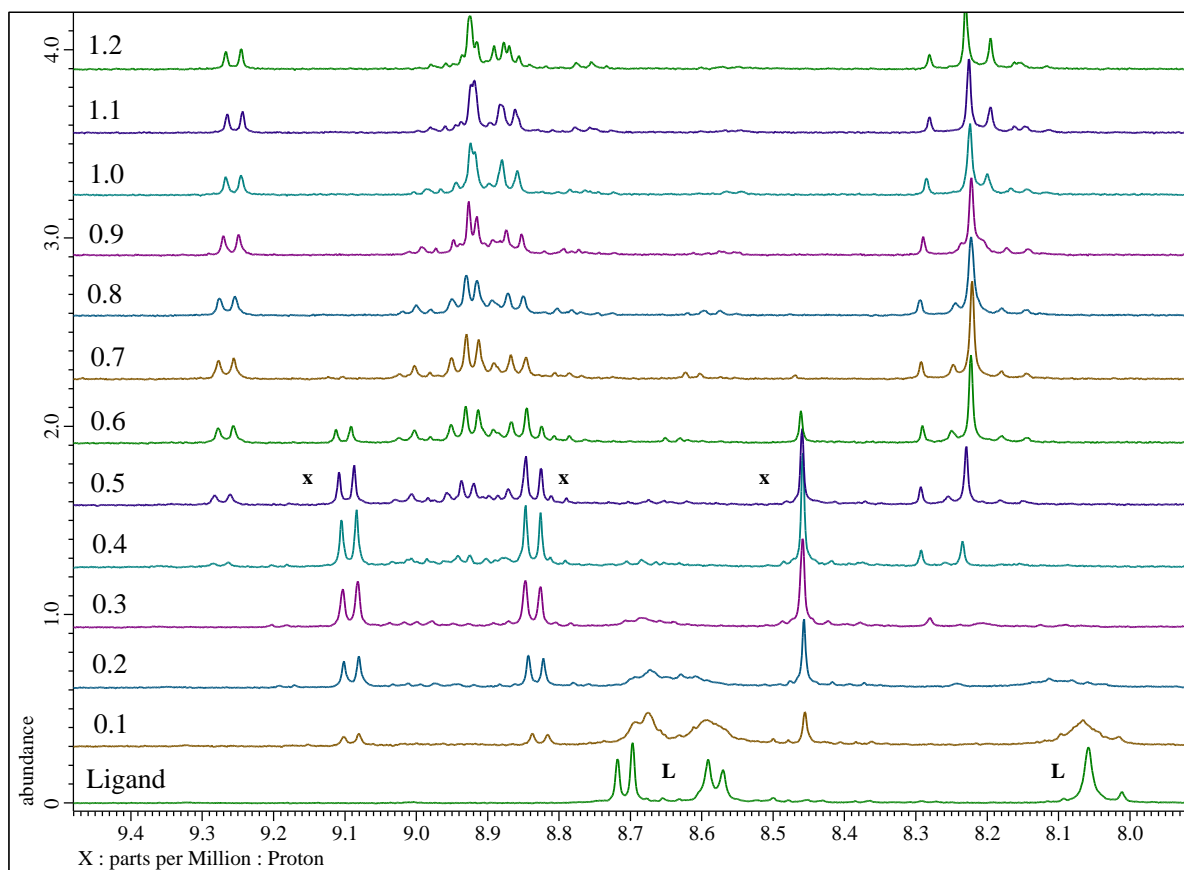

**Figure 32.** Aromatic region of the stack plot for the  $^1\text{H}$  NMR titration of BTPhen ligand **14** with  $\text{La}(\text{NO}_3)_3$  in  $\text{CD}_3\text{CN}$ . Bottom spectrum = free ligand. Each preceding spectrum corresponds to the addition of 0.1 equivalents of metal salt solution (L = free ligand, x = 1:2 complex  $[\text{La}(\mathbf{14})_2(\text{NO}_3)]^{2+}$ ).

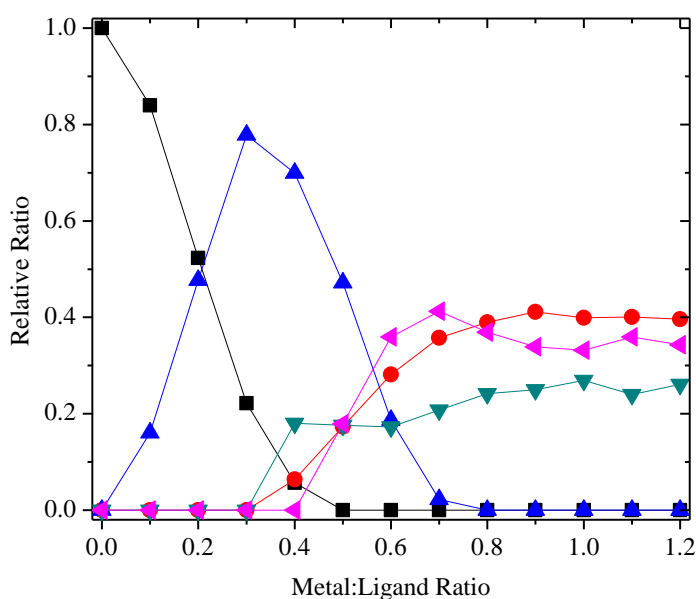

**Figure 33.** Species distribution for the  $^1\text{H}$  NMR titration of BTPhen **14** with  $\text{La}(\text{NO}_3)_3$  in  $\text{CD}_3\text{CN}$  (■ = free ligand, ▲ = 1:2 complex, ● = species A, ▼ = species B, ◄ = species C).

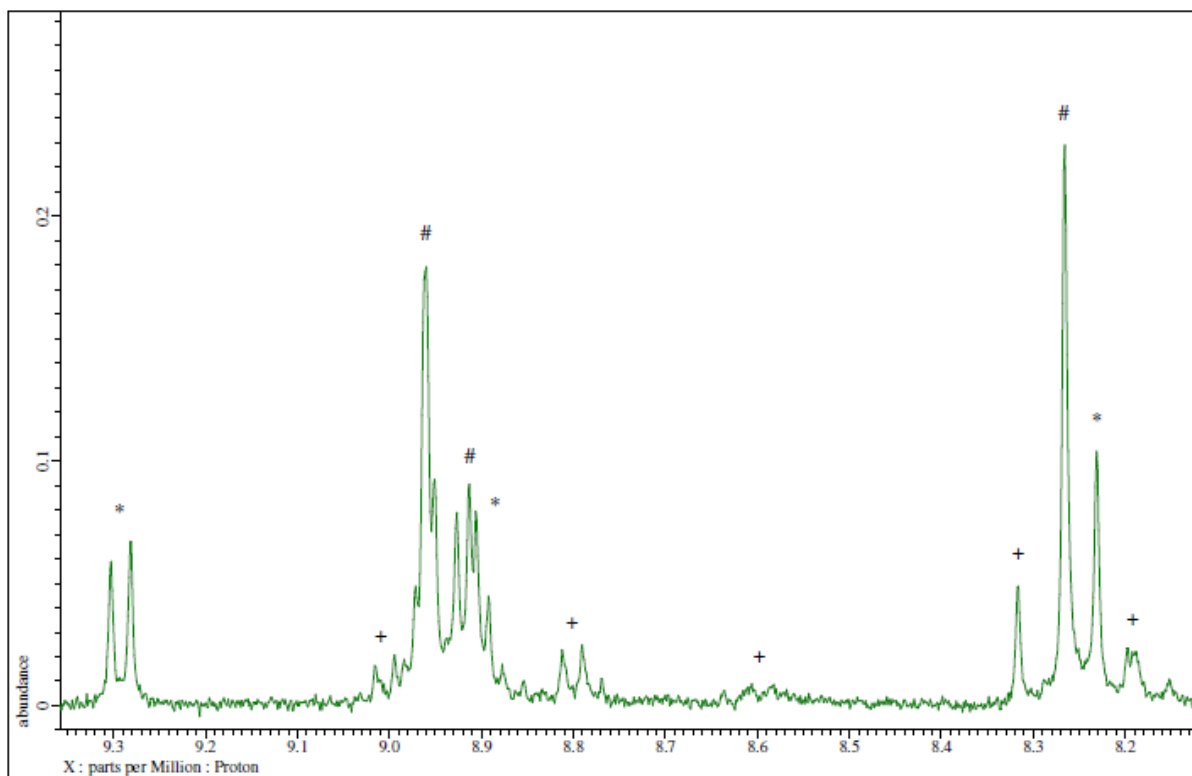

**Figure 34.** Enlargement of the aromatic region of the  $^1\text{H}$  NMR spectrum of a mixture of BTPPhen ligand **14** with  $\text{La}(\text{NO}_3)_3$  (1.2 equivalents) in  $\text{CD}_3\text{CN}$ . Assignments: \* = species A (symmetrical 1:1 complex with tetradentate coordination of ligand), + = species B (unsymmetrical 1:1 complex with pentadentate coordination of ligand), # = species C (symmetrical 1:1 complex with hexadentate coordination of ligand).

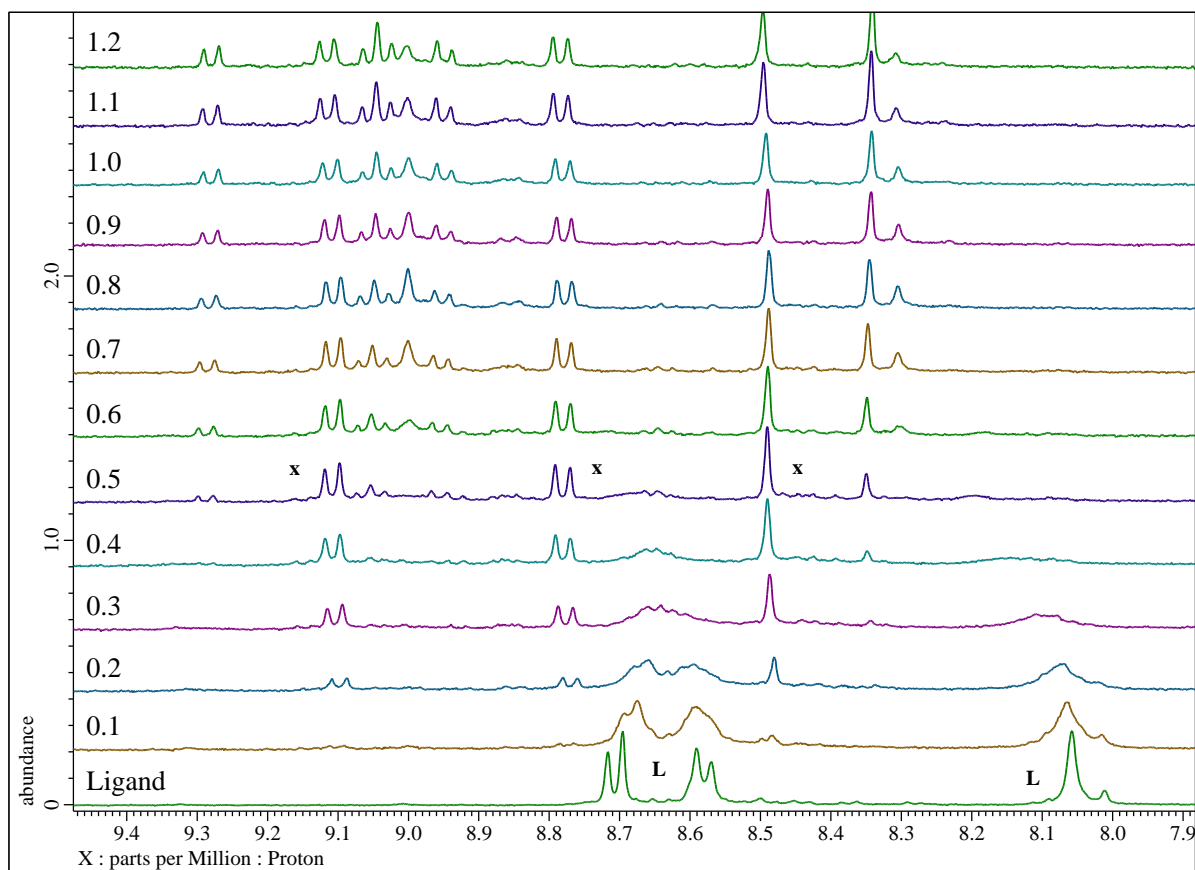

**Figure 35.** Aromatic region of the stack plot for the  $^1\text{H}$  NMR titration of BTPhen ligand **14** with  $\text{Lu}(\text{NO}_3)_3$  in  $\text{CD}_3\text{CN}$ . Bottom spectrum = free ligand. Each preceding spectrum corresponds to the addition of 0.1 equivalents of metal salt solution ( $\text{L}$  = free ligand,  $x = 1:2$  complex  $[\text{Lu}(\mathbf{14})_2(\text{NO}_3)]^{2+}$ ).

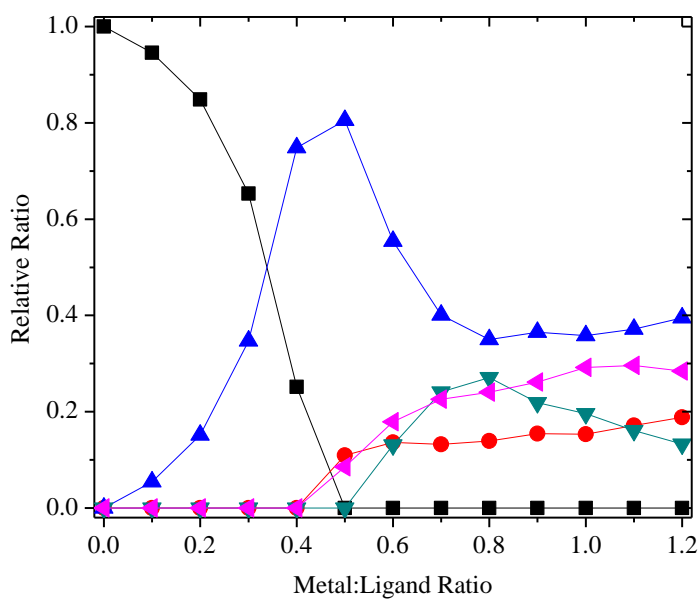

**Figure 36.** Species distribution for the  $^1\text{H}$  NMR titration of BTPhen **14** with  $\text{Lu}(\text{NO}_3)_3$  in  $\text{CD}_3\text{CN}$  (■ = free ligand, ▲ = 1:2 complex, ● = species A, ▼ = species B, ◄ = species C).

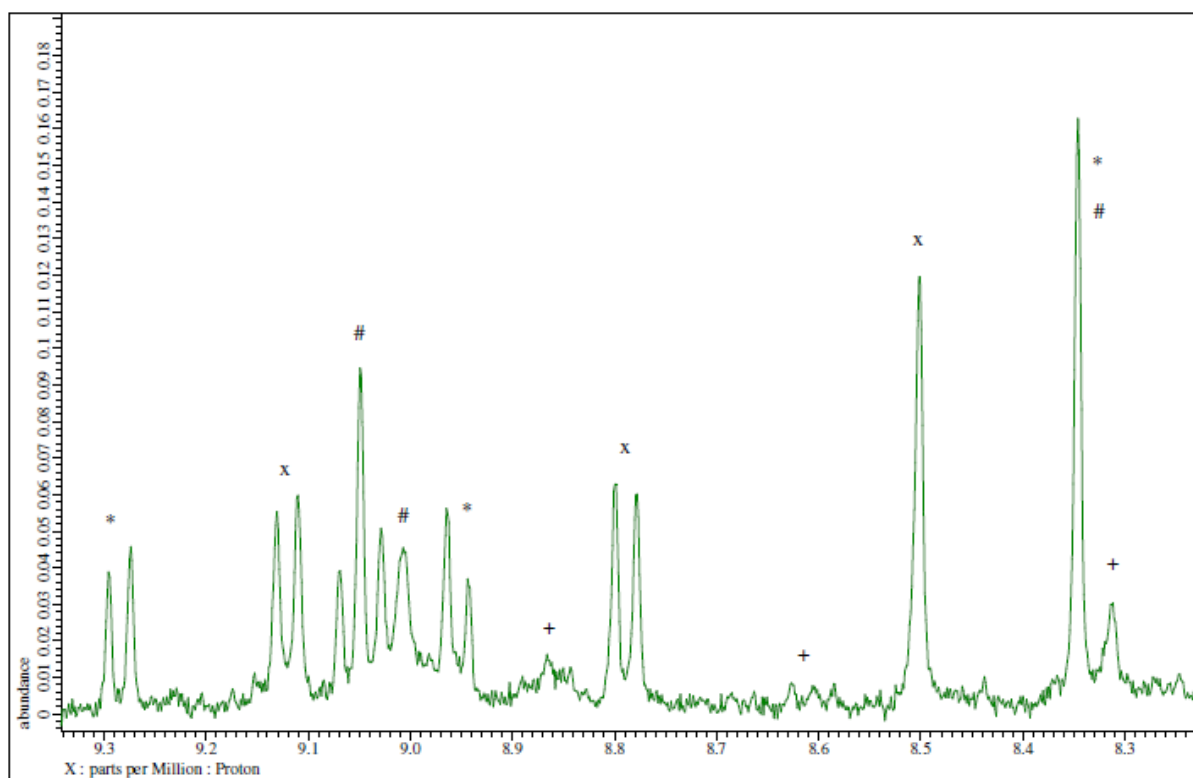

**Figure 37.** Enlargement of the aromatic region of the  $^1\text{H}$  NMR spectrum of a mixture of BTPPhen ligand **14** with  $\text{Lu}(\text{NO}_3)_3$  (1.2 equivalents) in  $\text{CD}_3\text{CN}$ . Assignments: x = 1:2 complex, \* = species A (symmetrical 1:1 complex with tetradentate coordination of ligand), + = species B (unsymmetrical 1:1 complex with pentadentate coordination of ligand), # = species C (symmetrical 1:1 complex with hexadentate coordination of ligand).

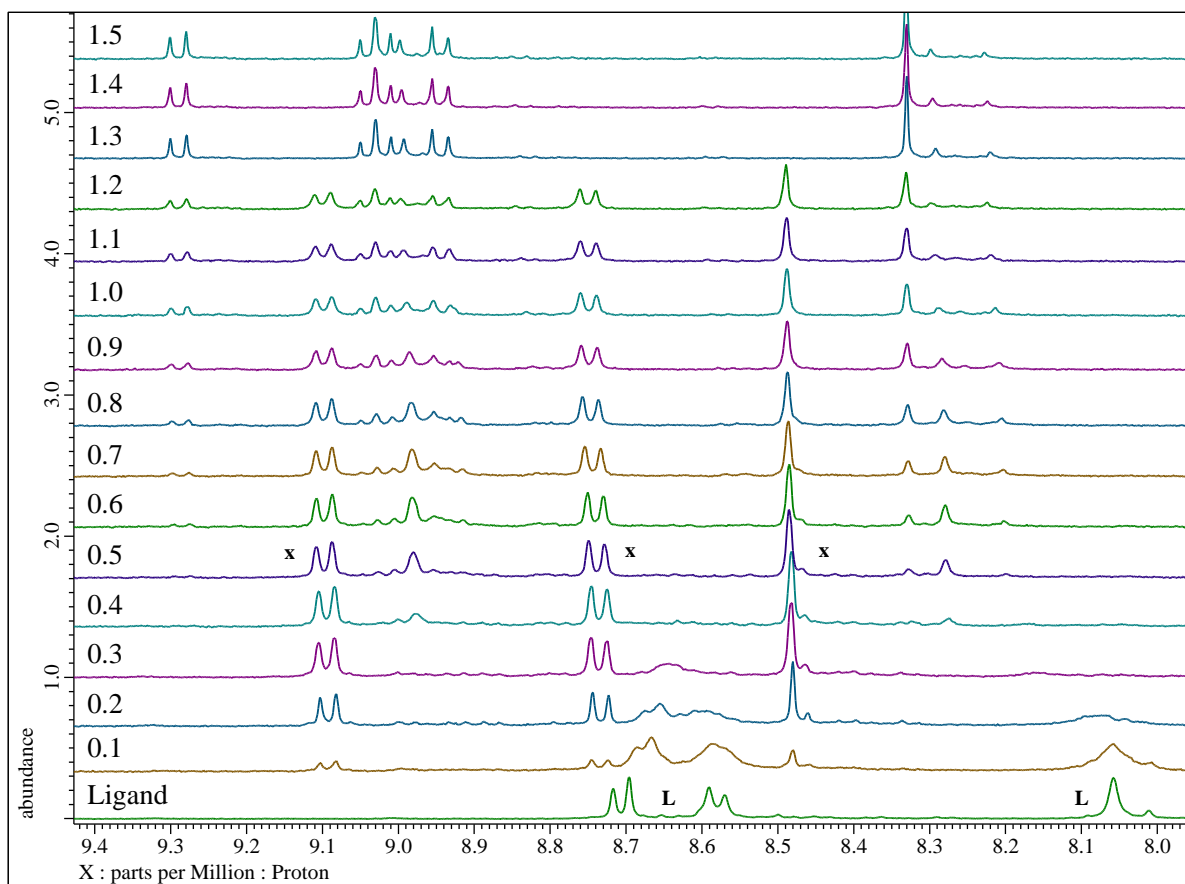

**Figure 38.** Aromatic region of the stack plot for the <sup>1</sup>H NMR titration of BTPhen ligand **14** with Y(NO<sub>3</sub>)<sub>3</sub> in CD<sub>3</sub>CN. Bottom spectrum = free ligand. Each preceding spectrum corresponds to the addition of 0.1 equivalents of metal salt solution (L = free ligand, x = 1:2 complex [Y(**14**)<sub>2</sub>(NO<sub>3</sub>)<sub>2</sub>]<sup>2+</sup>). The titration was stopped at a metal:ligand ratio of 1.2 and then resumed again after 1 week. After 1 week, the <sup>1</sup>H NMR spectrum at a metal:ligand ratio of 1.2 showed that all of the remaining 1:2 complex had dissociated to give the corresponding 1:1 complexes (species A, B and C).

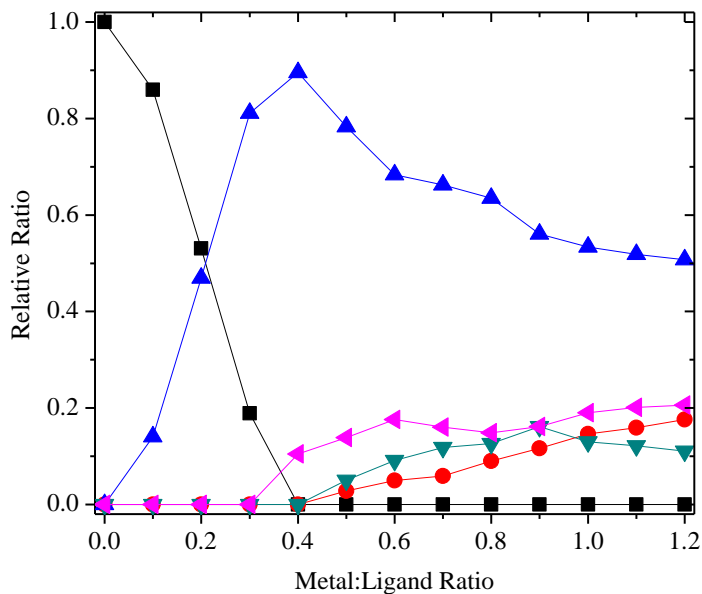

**Figure 39.** Species distribution for the  $^1\text{H}$  NMR titration of BTPhen **14** with  $\text{Y}(\text{NO}_3)_3$  in  $\text{CD}_3\text{CN}$  (■ = free ligand, ▲ = 1:2 complex, ● = species A, ▼ = species B, ◄ = species C).

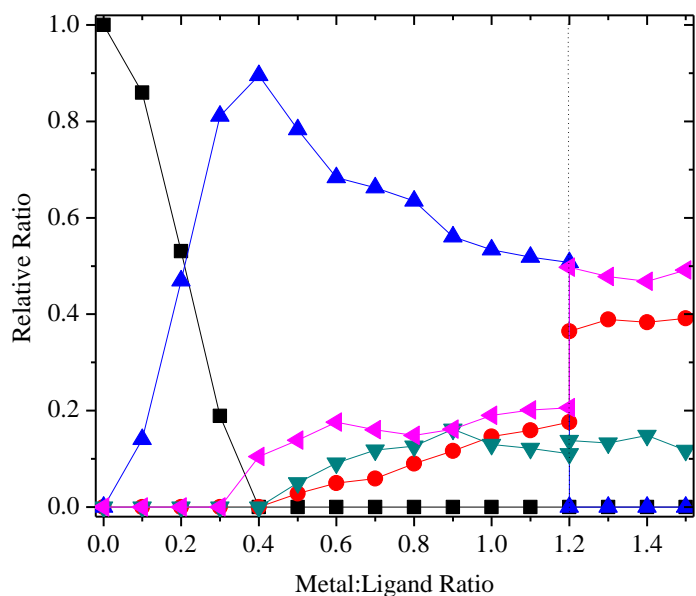

**Figure 40.** Species distribution for the  $^1\text{H}$  NMR titration of BTPhen **14** with  $\text{Y}(\text{NO}_3)_3$  in  $\text{CD}_3\text{CN}$  (■ = free ligand, ▲ = 1:2 complex, ● = species A, ▼ = species B, ◄ = species C). The dashed vertical line at a metal:ligand ratio of 1.2 indicates the titration was stopped at this point and then resumed again after 1 week. The  $^1\text{H}$  NMR spectrum at a metal:ligand ratio of 1.2 was acquired again after 1 week before the titration was resumed.



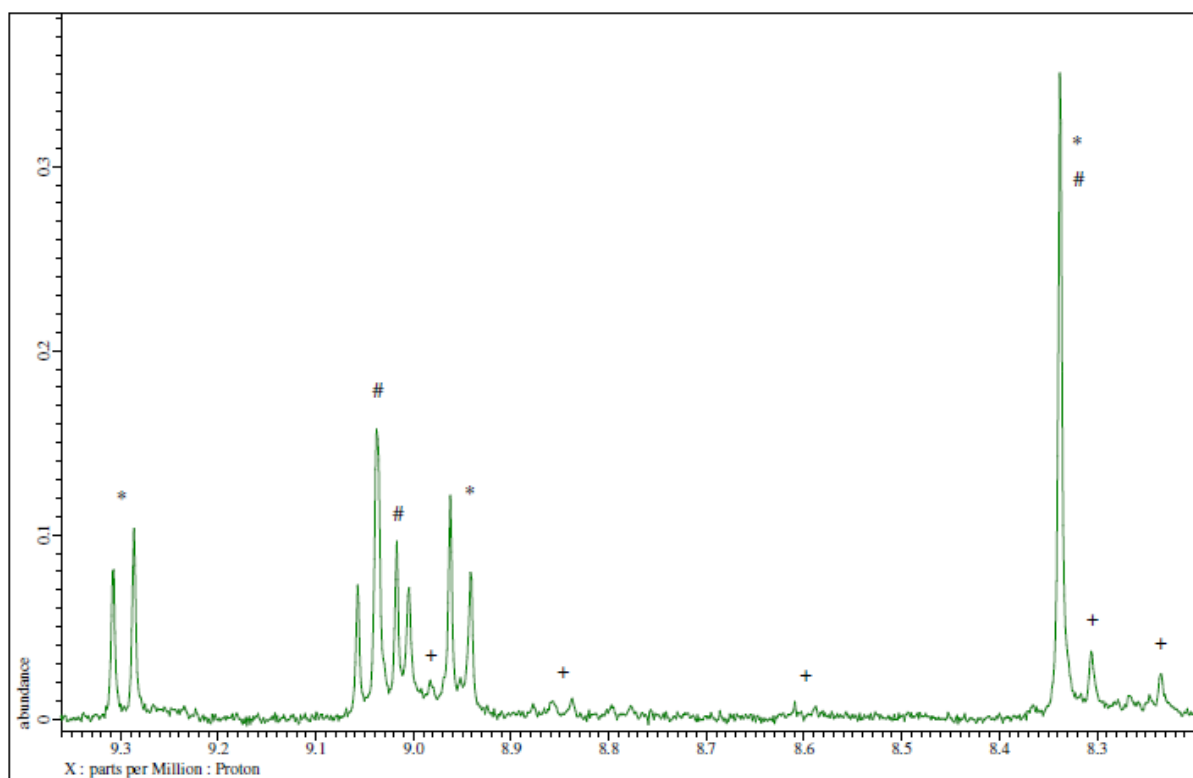

**Figure 41.** Enlargement of the aromatic region of the <sup>1</sup>H NMR spectrum of a mixture of BTPhen ligand **14** with Y(NO<sub>3</sub>)<sub>3</sub> (1.5 equivalents) in CD<sub>3</sub>CN. Assignments: \* = species A (symmetrical 1:1 complex with tetradentate coordination of ligand), + = species B (unsymmetrical 1:1 complex with pentadentate coordination of ligand), # = species C (symmetrical 1:1 complex with hexadentate coordination of ligand).

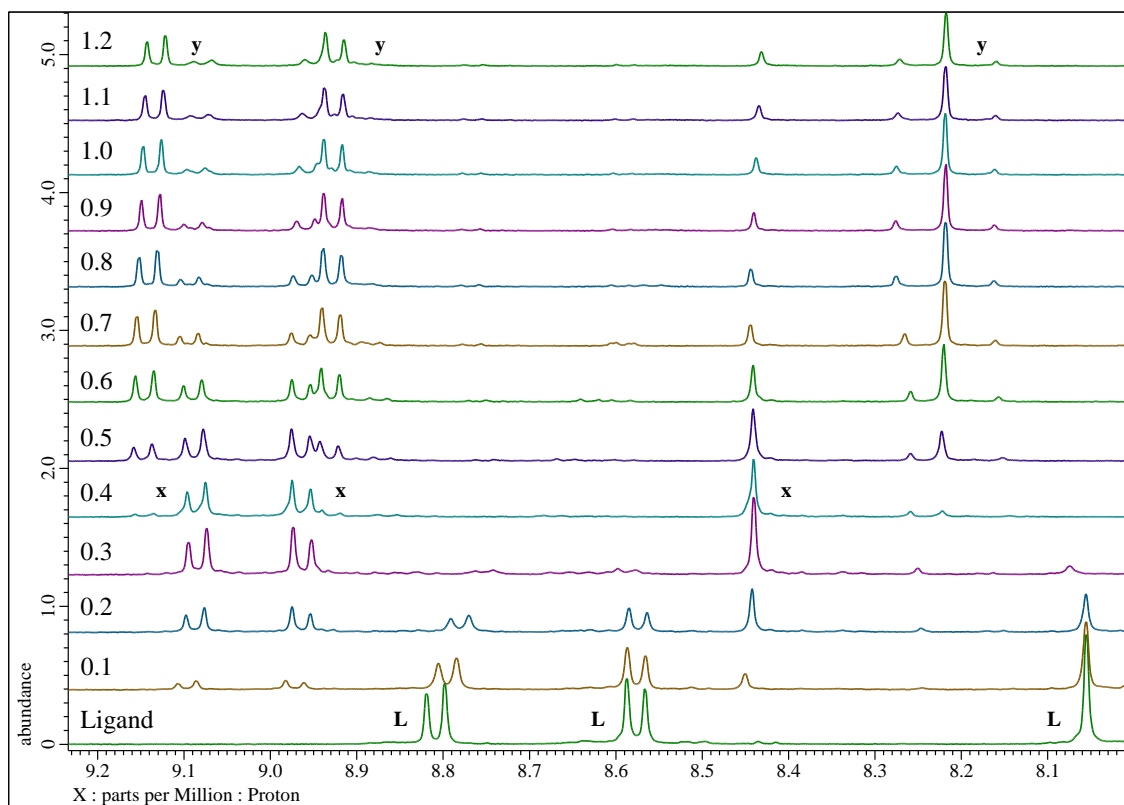

**Figure 42.** Aromatic region of the stack plot for the <sup>1</sup>H NMR titration of CA-BTPPhen ligand **18** with La(NO<sub>3</sub>)<sub>3</sub> in CD<sub>3</sub>CN. Bottom spectrum = free ligand. Each preceding spectrum corresponds to the addition of 0.1 equivalents of metal salt solution (L = free ligand, x = 1:2 complex [La(**18**)<sub>2</sub>(NO<sub>3</sub>)<sub>2</sub>]<sup>2+</sup>, y = 1:1 complex [La(**18**)(NO<sub>3</sub>)<sub>3</sub>]).

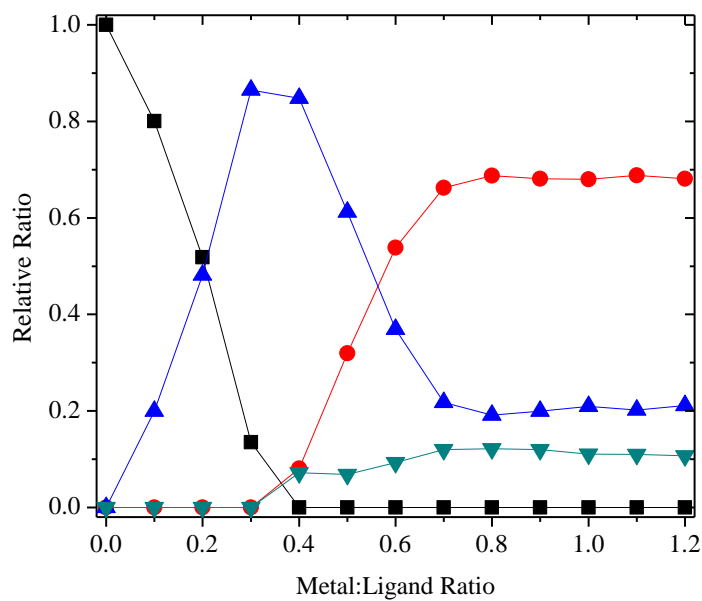

**Figure 43.** Species distribution for the  $^1\text{H}$  NMR titration of CA-BTPhen **18** with  $\text{La}(\text{NO}_3)_3$  in  $\text{CD}_3\text{CN}$  (■ = free ligand, ▲ = 1:2 complex, ● = symmetrical 1:1 complex with tetradentate coordination of ligand, ▼ = unsymmetrical 1:1 complex with pentadentate coordination of ligand).

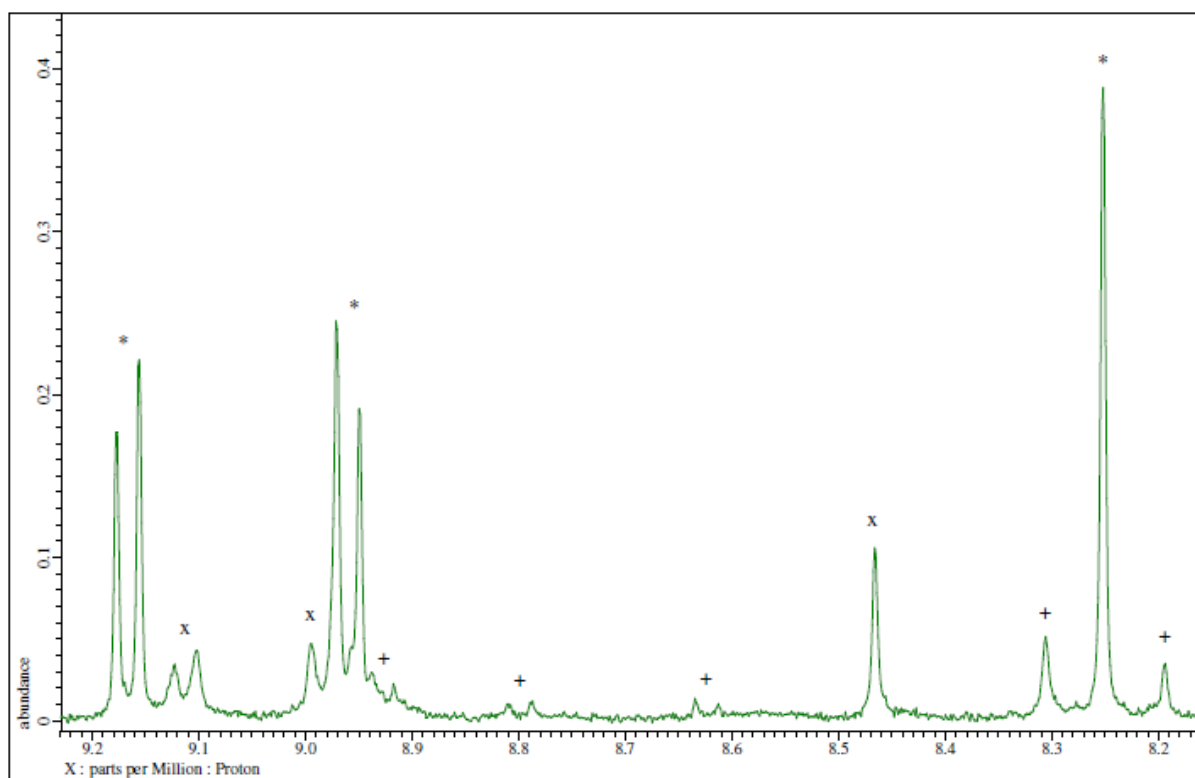

**Figure 44.** Enlargement of the aromatic region of the <sup>1</sup>H NMR spectrum of a mixture of CA-BTPhen ligand **18** with La(NO<sub>3</sub>)<sub>3</sub> (1.2 equivalents) in CD<sub>3</sub>CN. Assignments: x = 1:2 complex, \* = symmetrical 1:1 complex with tetradentate coordination of ligand, + = unsymmetrical 1:1 complex with pentadentate coordination of ligand.

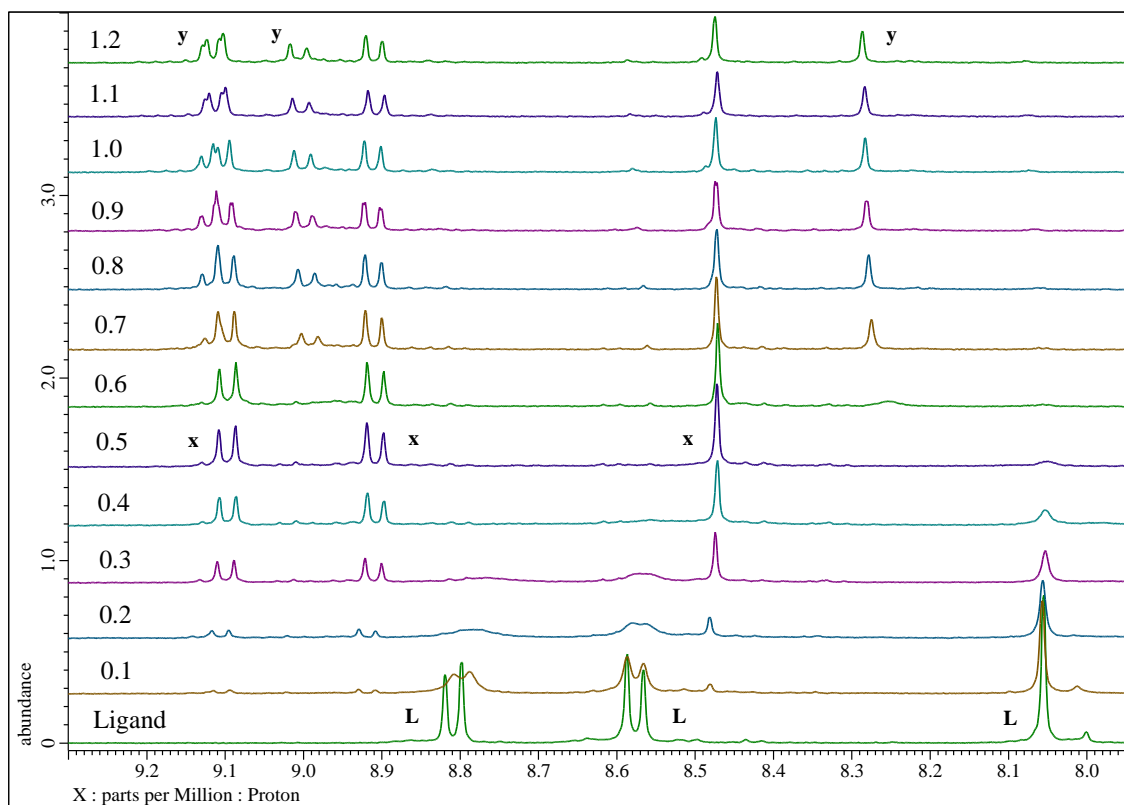

**Figure 45.** Aromatic region of the stack plot for the  $^1\text{H}$  NMR titration of CA-BTPPhen ligand **18** with  $\text{Lu}(\text{NO}_3)_3$  in  $\text{CD}_3\text{CN}$ . Bottom spectrum = free ligand. Each preceding spectrum corresponds to the addition of 0.1 equivalents of metal salt solution (L = free ligand, x = 1:2 complex  $[\text{Lu}(\mathbf{18})_2(\text{NO}_3)]^{2+}$ , y = 1:1 complex  $[\text{Lu}(\mathbf{18})(\text{NO}_3)_3]$ ).

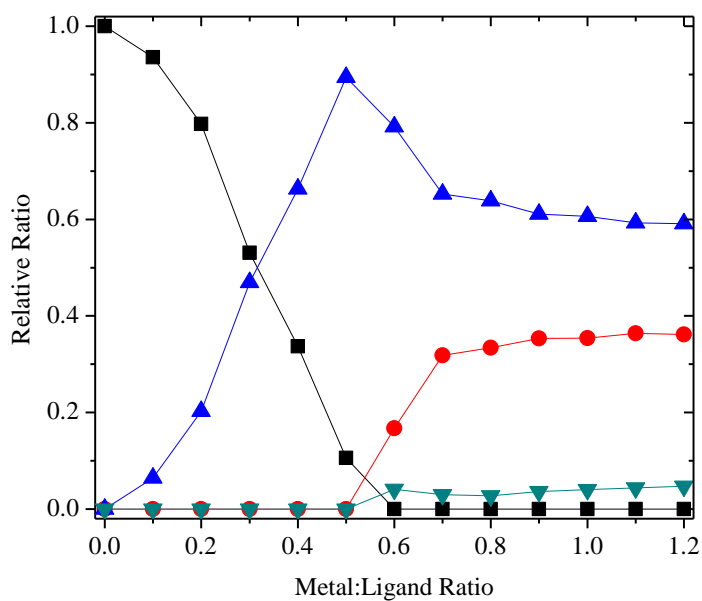

**Figure 46.** Species distribution for the  $^1\text{H}$  NMR titration of CA-BTPhen **18** with  $\text{Lu}(\text{NO}_3)_3$  in  $\text{CD}_3\text{CN}$  (■ = free ligand, ▲ = 1:2 complex, ● = symmetrical 1:1 complex with tetradentate coordination of ligand, ▼ = unsymmetrical 1:1 complex with pentadentate coordination of ligand).

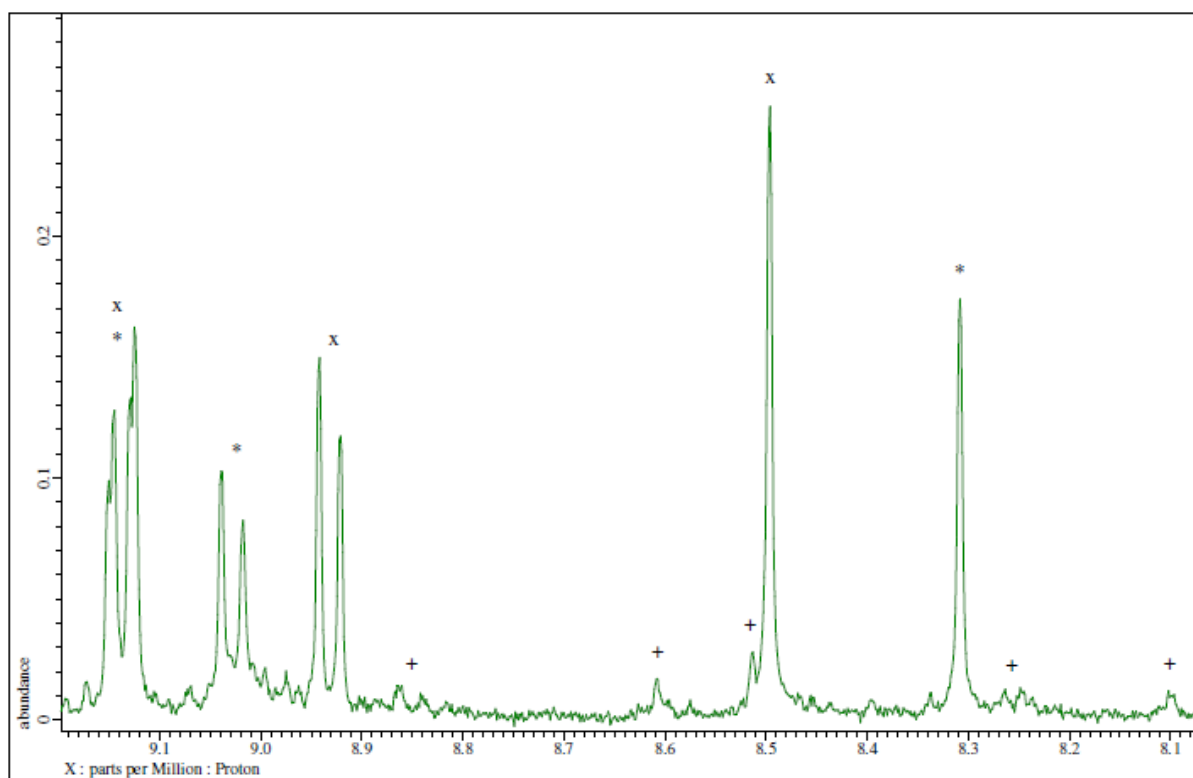

**Figure 47.** Enlargement of the aromatic region of the  $^1\text{H}$  NMR spectrum of a mixture of CA-BTPhen ligand **18** with  $\text{Lu}(\text{NO}_3)_3$  (1.2 equivalents) in  $\text{CD}_3\text{CN}$ . Assignments: x = 1:2 complex, \* = symmetrical 1:1 complex with tetradentate coordination of ligand, + = unsymmetrical 1:1 complex with pentadentate coordination of ligand.

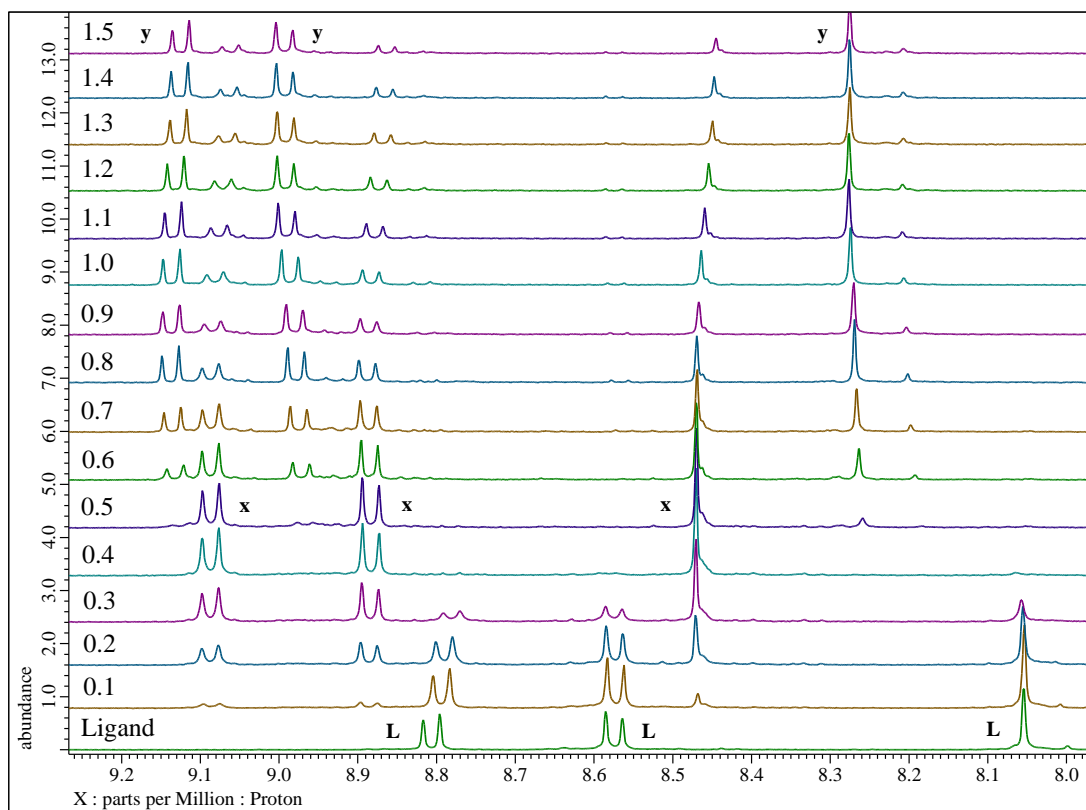

**Figure 48.** Aromatic region of the stack plot for the <sup>1</sup>H NMR titration of CA-BTPPhen ligand **18** with Y(NO<sub>3</sub>)<sub>3</sub> in CD<sub>3</sub>CN. Bottom spectrum = free ligand. Each preceding spectrum corresponds to the addition of 0.1 equivalents of metal salt solution (L = free ligand, x = 1:2 complex [Y(**18**)<sub>2</sub>(NO<sub>3</sub>)<sub>2</sub>]<sup>2+</sup>, y = 1:1 complex [Y(**18**)(NO<sub>3</sub>)<sub>3</sub>]).



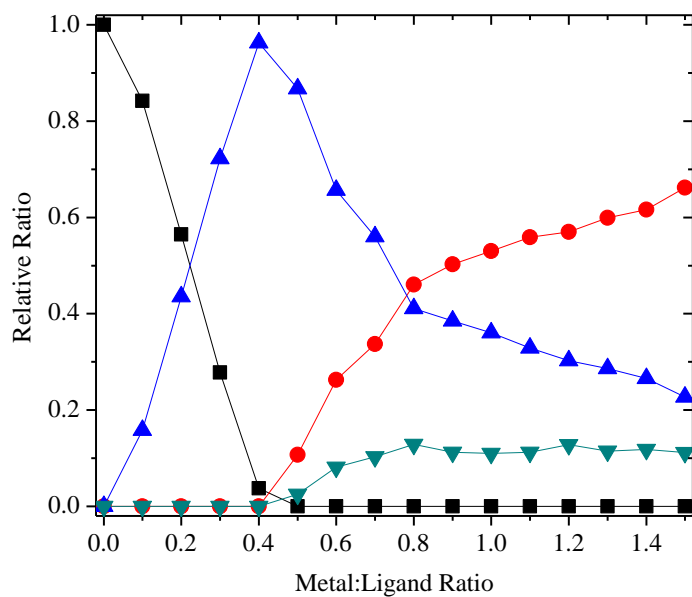

**Figure 49.** Species distribution for the  $^1\text{H}$  NMR titration of CA-BTPhen **18** with  $\text{Y}(\text{NO}_3)_3$  in  $\text{CD}_3\text{CN}$  (■ = free ligand, ▲ = 1:2 complex, ● = symmetrical 1:1 complex with tetradentate coordination of ligand, ▼ = unsymmetrical 1:1 complex with pentadentate coordination of ligand).

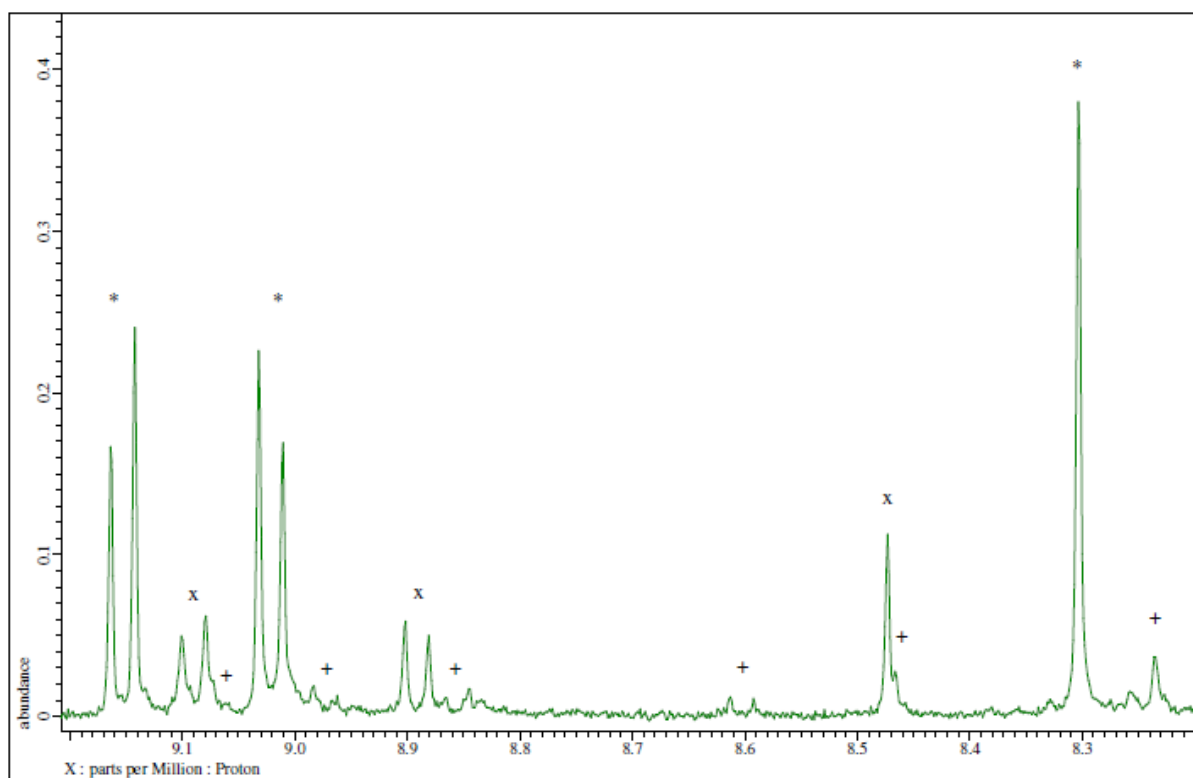

**Figure 50.** Enlargement of the aromatic region of the  $^1\text{H}$  NMR spectrum of a mixture of CA-BTPhen ligand **18** with  $\text{Y}(\text{NO}_3)_3$  (1.5 equivalents) in  $\text{CD}_3\text{CN}$ . Assignments: x = 1:2 complex, \* = symmetrical 1:1 complex with tetradentate coordination of ligand, + = unsymmetrical 1:1 complex with pentadentate coordination of ligand.

**Table 23.** Percentage of the 1:2 complex that is present at the end of the  $^1\text{H}$  NMR titrations of each of the BTPhen ligands **3a**, **3b**, **12**, **14** and **18** with La(III), Lu(III) and Y(III) in  $\text{CD}_3\text{CN}$ .

| Ligand                        | La(III) | Lu(III) | Y(III)           |
|-------------------------------|---------|---------|------------------|
| BTPhen <b>3a</b> <sup>a</sup> | 73%     | 79%     | 95%              |
| BTPhen <b>3b</b> <sup>b</sup> | 64%     | 70%     | 82%              |
| BTPhen <b>12</b>              | 0%      | 25%     | 14%              |
| BTPhen <b>14</b>              | 0%      | 39%     | 50% <sup>c</sup> |
| CA-BTPhen <b>18</b>           | 21%     | 59%     | 23%              |

<sup>a</sup> Taken from ref. 10. <sup>b</sup> Taken from ref. 11. <sup>c</sup> This decreased to 0% after 1 week, see **Figure**

**40.**

## 8: Kinetics and Interfacial Tension Measurements

**Table 24.** Interfacial tension measurements for BTPhen **12** in 1-octanol as a function of the ligand concentration (organic phase: pre-equilibrated solutions of **12** in 1-octanol; aqueous phase: pre-equilibrated 1 M HNO<sub>3</sub> at 22–23 °C).

| [BTPhen <b>12</b> ] (mM) | Measured $\sigma$ (mN/m) | Absolute $\sigma$ (mN/m) |
|--------------------------|--------------------------|--------------------------|
| 12.0                     | 0.2                      | 0.2                      |
| 10.0                     | 0.5                      | 0.4                      |
| 7.5                      | 3.4                      | 3.0                      |
| 7.5                      | 3.2                      | 2.8                      |
| 6.7                      | 4.1                      | 3.6                      |
| 5.0                      | 4.8                      | 4.2                      |
| 2.3                      | 4.9                      | 4.3                      |
| 1.02                     | 5.4                      | 4.8                      |
| 0.442                    | 5.6                      | 5.0                      |
| 0.121                    | 5.6                      | 5.0                      |
| 0.012                    | 5.4                      | 4.8                      |
| 0.000                    | 5.6                      | 5.0                      |

**Table 25.** Interfacial tension measurements for BTPhen **3a** in 1-octanol as a function of the ligand concentration (organic phase: pre-equilibrated solutions of **3a** in 1-octanol; aqueous phase: pre-equilibrated 1 M HNO<sub>3</sub> at 22–23 °C, data taken from ref. 12).

| [BTPhen <b>3a</b> ] (mM) | Measured $\sigma$ (mN/m) | Absolute $\sigma$ (mN/m) |
|--------------------------|--------------------------|--------------------------|
| 10                       | 0.4                      | 0.3                      |
| 10                       | 0.3                      | 0.3                      |
| 7.61                     | 1.2                      | 1.0                      |
| 6.2                      | 3.4                      | 3.0                      |
| 0.698                    | 4.2                      | 3.7                      |
| 0.123                    | 4.6                      | 4.0                      |
| 0.0125                   | 4.9                      | 4.3                      |
| 0                        | 5.3                      | 4.7                      |

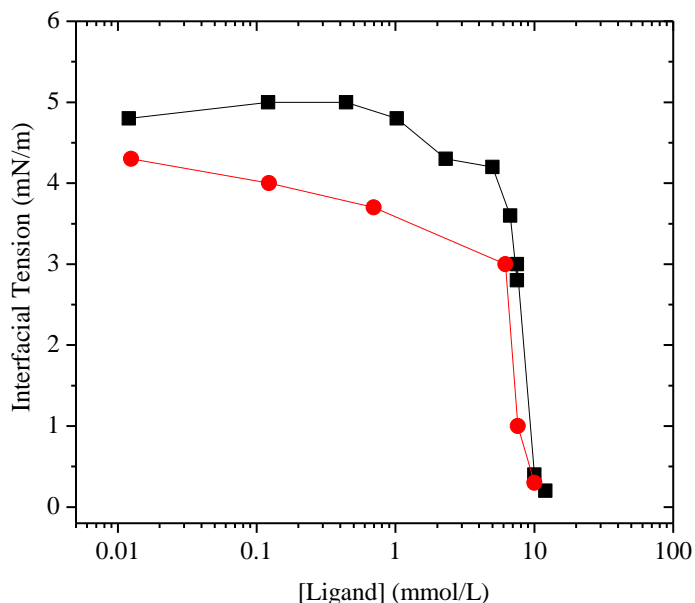

**Figure 51.** Interfacial tension measurements for BTPhen ligands **12** and **3a** in 1-octanol as a function of the ligand concentration (■ = BTPhen **12**, ● = BTPhen **3a**, organic phase: pre-equilibrated solutions of **12** or **3a** in 1-octanol, aqueous phase: pre-equilibrated 1 M HNO<sub>3</sub> at 22–23 °C). Data for BTPhen **3a** taken from ref. 12.

**Table 26.** Extraction ( $k_{\text{ext}}$ ) and back-extraction ( $k_{\text{str}}$ ) rate constants for the extraction/back-extraction of <sup>241</sup>Am(III) and <sup>152</sup>Eu(III) by BTPhen ligands **12** and **3a** (organic phase: 10 mM **12** or **3a** in 1-octanol, aqueous phase: 3 M HNO<sub>3</sub>).

| Ligand                     | Metal   | <i>D</i> | $k_{\text{ext}}$ (cm/s) | $k_{\text{str}}$ (cm/s) |
|----------------------------|---------|----------|-------------------------|-------------------------|
| <b>12</b> <sup>a</sup>     | Eu(III) | 0.334    | $2.7 \times 10^{-5}$    | $8.2 \times 10^{-5}$    |
| <b>12</b> <sup>b</sup>     | Eu(III) | 0.334    | $2.2 \times 10^{-5}$    | $6.4 \times 10^{-5}$    |
| <b>12</b> <sup>a</sup>     | Am(III) | 74.5     | $9.6 \times 10^{-5}$    | $1.3 \times 10^{-6}$    |
| <b>3a</b> <sup>a,c</sup>   | Eu(III) | 9.0      | $3.8 \times 10^{-6}$    | $0.43 \times 10^{-6}$   |
| <b>3a</b> <sup>a,c,d</sup> | Eu(III) | 12.6     | $1.85 \times 10^{-5}$   | $1.47 \times 10^{-6}$   |

<sup>a</sup> Results measured for extraction. <sup>b</sup> Results measured for back-extraction. <sup>c</sup> Data taken from ref. 12. <sup>d</sup> 0.01 M TODGA (*N,N,N',N'*-tetraoctyldiglycolamide) was added to the organic phase.

## 9: References

1. (a) A. C. Edwards, C. Wagner, A. Geist, N. A. Burton, C. A. Sharrad, R. W. Adams, R. G. Pritchard, P. J. Panak, R. C. Whitehead, L. M. Harwood, *Dalton Trans.* **2016**, 45, 18102–18112; (b) A. Afsar, J. Cowell, P. Distler, L. M. Harwood, J. John, J. Westwood, *Synlett* **2017**, 28, 2795–2799.
2. F. W. Lewis, L. M. Harwood, M. J. Hudson, A. Geist, V. N. Kozhevnikov, P. Distler, J. John, *Chem. Sci.* **2015**, 6, 4812–4821.
3. U. Huynh, S. L. McDonald, D. Lim, Md. N. Uddin, S. E. Wengryniuk, S. Dey, D. M. Coltart, *J. Org. Chem.* **2018**, 83, 12951–12964.
4. (a) T. Poloński, *J. Chem. Soc. Perkin Trans. 1* **1983**, 305–309; (b) A. García Martínez, E. Teso Vilar, A. García Fraile, P. Martínez-Ruiz, *Tetrahedron: Asymmetry* **2005**, 16, 2329–2332.
5. D. M. Laventine, A. Afsar, M. J. Hudson, L. M. Harwood, *Heterocycles* **2012**, 86, 1419–1429.
6. D. Magnusson, B. Christiansen, M. R. S. Foreman, A. Geist, J.-P. Glatz, R. Malmbeck, G. Modolo, D. Serrano-Purroy, C. Sorel, *Solvent Extr. Ion Exch.* **2009**, 27, 97–106.
7. V. G. Levich, *Physicochemical Hydrodynamics*; Prentice Hall, Englewood Cliffs, New Jersey, **1962**.
8. J.-P. Simonin, R. Mills, A. Perera, P. Turq, F. Tallet, *J. Solution Chem.* **1986**, 15, 1015–1030.
9. (a) S. Trumm, A. Geist, P. J. Panak, T. Fanghänel, *Solvent Extr. Ion Exch.* **2011**, 29, 213–229; (b) S. Trumm, A. Geist, P. J. Panak, T. Fanghänel, EP2377859A1, **2011**.
10. F. W. Lewis, L. M. Harwood, M. J. Hudson, M. G. B. Drew, V. Hubscher-Bruder, V. Videva, F. Arnaud-Neu, K. Stamberg, S. Vyas, *Inorg. Chem.* **2013**, 52, 4993–5005.
11. A. V. Zaytsev, R. Bulmer, V. N. Kozhevnikov, M. Sims, G. Modolo, A. Wilden, P. G. Waddell, A. Geist, P. J. Panak, P. Wessling, F. W. Lewis, *Chem. Eur. J.* **2020**, 26, 428–437.
12. F. W. Lewis, L. M. Harwood, M. J. Hudson, M. G. B. Drew, J. F. Desreux, G. Vidick, N. Bouslimani, G. Modolo, A. Wilden, M. Sypula, T.-H. Vu, J.-P. Simonin, *J. Am. Chem. Soc.* **2011**, 133, 13093–13102.
